# Supplementary material for: Elucidation of Akkermansia muciniphila Probiotic Traits Driven by Mucin Depletion
Source: PubMed Central journal article supplement (PMC6538878; doi:10.3389/fmicb.2019.01137), 2019-05-22
Supplement: Data_Sheet_1.pdf [file Data_Sheet_1.pdf]

## *Supplementary Material*

### **Elucidation of *Akkermansia muciniphila* probiotic traits driven by mucin depletion**

**Jongoh Shin<sup>1,#</sup>, Jung-Ran Noh<sup>2,#</sup>, Dong-Ho Chang<sup>3</sup>, Yong-Hoon Kim<sup>2</sup>, Myung Hee Kim<sup>4</sup>, Eaum Seok Lee<sup>5</sup>, Suhyung Cho<sup>1</sup>, Bon Jeong Ku<sup>5</sup>, Moon-Soo Rhee<sup>6</sup>, Byoung-Chan Kim<sup>3,7,8,\*</sup>, Chul-Ho Lee<sup>2,\*</sup>, and Byung-Kwan Cho<sup>1,9,\*</sup>**

**\* Correspondence:** Byoung-Chan Kim, [bckim@kribb.re.kr](mailto:bckim@kribb.re.kr); Chul-Ho Lee, [chullee@kribb.re.kr](mailto:chullee@kribb.re.kr); Byung-Kwan Cho, [bcho@kaist.ac.kr](mailto:bcho@kaist.ac.kr)

## Supplementary Figure

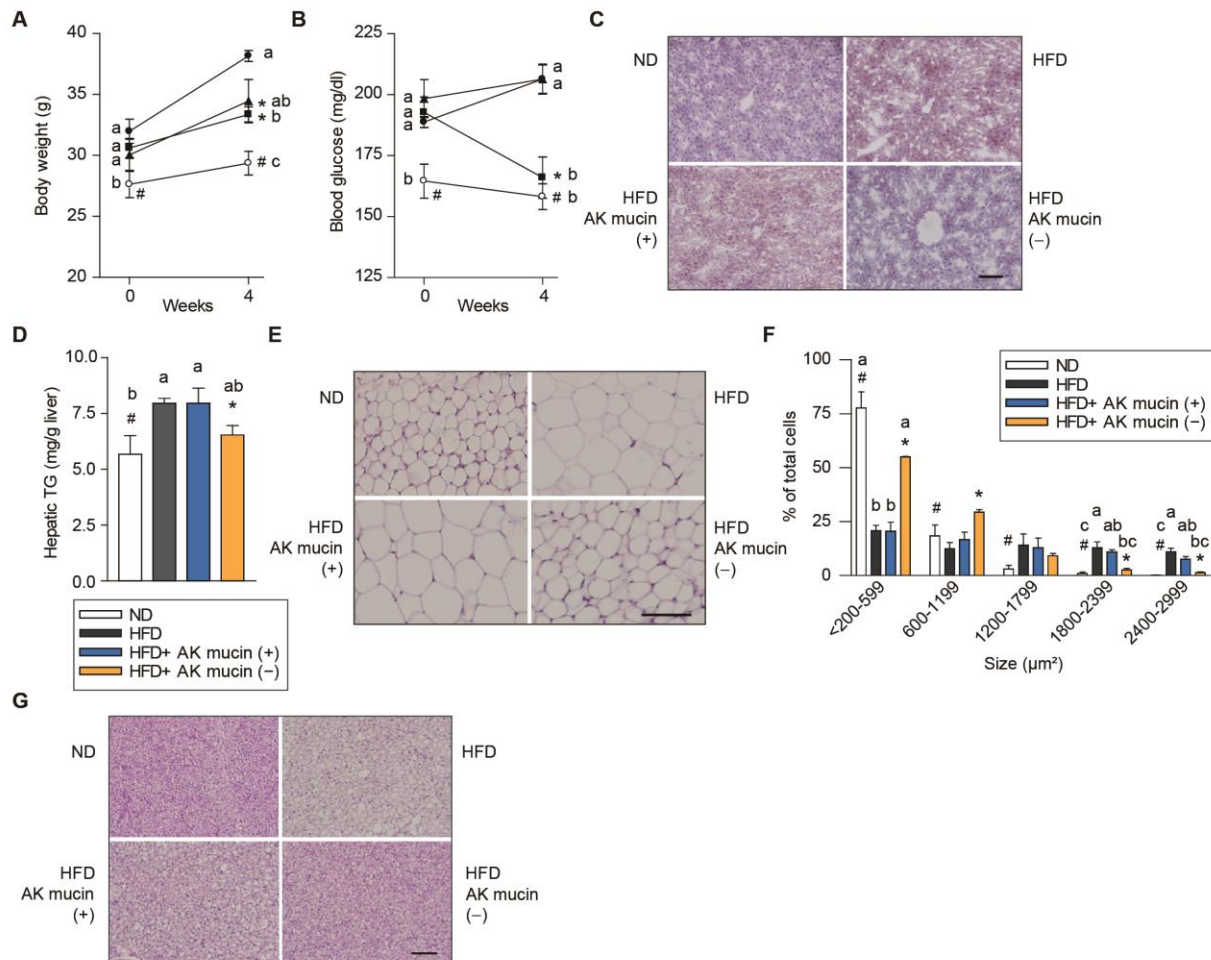

**Supplementary Figure 1. Effects of *A. muciniphila* on HFD-induced obesity.** (A) Absolute body weight (g) and (B) blood glucose (mg/dl) after 4 weeks of treatment. (C) Representative liver Oil-red O-stained pictures and (D) quantification of hepatic triglyceride content. Scale bars, 200  $\mu\text{m}$ . (E) Representative H&E-stained pictures and (F) size distribution of subcutaneous adipose tissue deposits. Scale bars, 100  $\mu\text{m}$ . (G) Representative H&E-stained pictures of brown adipose tissues. Scale bars, 100  $\mu\text{m}$ . Data are means  $\pm$  SEM (n=4-5 for each group). # $P$ < 0.05, High fat diet (HFD) vs. Normal chow diet (ND) group, \* $P$ <0.05, HFD vs. *A. muciniphila*-treated group (two-tailed Student's t-test). <sup>abc</sup>Means not sharing a common letter are significantly different at  $P$ <0.05 (Tukey-Kramer HSD test).
