# Supplementary material for: Elucidation of Akkermansia muciniphila Probiotic Traits Driven by Mucin Depletion
Source: Front Microbiol. 2019 May 22;10:1137. doi: 10.3389/fmicb.2019.01137 (PMC6538878; doi:10.3389/fmicb.2019.01137)
Supplement: Supplementary file 2 [file Table_2.XLSX]

## Sheet: Sheet1
	Supplementary Table S2. mRNA expression profiles according to mucin (+) and mucin (-) growth condition in A. muciniphila
	Locus_tag	Locus_tag_old	Mucin(+)	Mucin (-)	Fold change	Padj-value	Uniprot	Function
	AMUC_RS00005		116.481	27.204	0.23355	1.1317e-16
	AMUC_RS00015	Amuc_0001	91.3806	147.025	1.60893	0.000781339	B2UL59_AKKM8	NUDIX hydrolase
	AMUC_RS00020	Amuc_0002	78.9313	113.293	1.43534	0.0260352
	AMUC_RS00025	Amuc_0003	267.616	316.562	1.1829	0.0896776	B2UL61_AKKM8	ABC transporter related
	AMUC_RS00030	Amuc_0004	62.4247	77.7938	1.2462	0.237066	B2UL62_AKKM8	Uncharacterized protein
	AMUC_RS00035	Amuc_0005	107.808	365.719	3.39233	7.96306e-26	B2UL63_AKKM8	Uncharacterized protein
	AMUC_RS00040	Amuc_0006	474.845	247.319	0.520842	6.8812e-13	B2UL64_AKKM8	Uncharacterized protein
	AMUC_RS00045	Amuc_0007	24.2386	56.2005	2.31864	0.00147847	B2UL65_AKKM8	Uncharacterized protein
	AMUC_RS00050	Amuc_0008	17.0278	45.3481	2.66318	0.000390102	B2UL66_AKKM8	Pseudouridine synthase (EC 5.4.99.-)
	AMUC_RS00055	Amuc_0009	199.052	176.225	0.88532	0.30018	B2UL67_AKKM8	Chorismate mutase
	AMUC_RS00060	Amuc_0010	83.1347	105.683	1.27123	0.131195	B2UL68_AKKM8	Alpha-L-fucosidase (EC 3.2.1.51)
	AMUC_RS00065	Amuc_0011	468.67	154.626	0.329926	1.23697e-17	DNLJ_AKKM8	DNA ligase (EC 6.5.1.2) (Polydeoxyribonucleotide synthase [NAD(+)])
	AMUC_RS00070	Amuc_0012	267.399	130.287	0.487239	2.50514e-09	A0A1Y3SY17_9BACT	CDP-diacylglycerol--glycerol-3-phosphate 3-phosphatidyltransferase
	AMUC_RS00075	Amuc_0014	97.0722	54.2378	0.558737	0.00358416	B2UL72_AKKM8	Uncharacterized protein
	AMUC_RS00080	Amuc_0015	6211.46	1550.06	0.249548	2.3673e-116	B2UL73_AKKM8	DEAD/DEAH box helicase domain protein
	AMUC_RS00085	Amuc_0016	239764	9961.29	0.0415463	0	B2UL74_AKKM8	Uncharacterized protein
	AMUC_RS00090		25695	2647.45	0.103034	1.79842e-121
	AMUC_RS00095	Amuc_0017	2008.72	805.333	0.400918	3.36745e-38	G1091_AKKM8	Glycosyl hydrolase family 109 protein 1 (EC 3.2.1.-)
	AMUC_RS00100	Amuc_0018	492.706	97.4174	0.197719	3.28275e-56	B2UL76_AKKM8	Uncharacterized protein
	AMUC_RS00110	Amuc_0020	35.0313	183.786	5.24632	2.07743e-20	B2UL78_AKKM8	Major facilitator superfamily MFS_1
	AMUC_RS00115	Amuc_0021	182.009	171.295	0.941138	0.638795
	AMUC_RS00120	Amuc_0022	235.23	93.5209	0.397573	2.01832e-13
	AMUC_RS00125	Amuc_0023	77.2412	37.4868	0.485322	0.000110971	B2UL81_AKKM8	Phenazine biosynthesis protein PhzF family
	AMUC_RS00135	Amuc_0025	638.877	591.511	0.925859	0.343101
	AMUC_RS00140	Amuc_0026	320.986	476.852	1.48558	2.46687e-05	B2UL84_AKKM8	Uncharacterized protein
	AMUC_RS00145		11.5773	12.1001	1.04515	0.991961	A0A1Y3SXI8_9BACT	Uncharacterized protein
	AMUC_RS00150	Amuc_0027	232.189	215.099	0.926394	0.847426
	AMUC_RS00155	Amuc_0028	33.7033	17.864	0.530037	0.0306081	B2UL86_AKKM8	Uncharacterized protein
	AMUC_RS00160	Amuc_0029	1439.07	1442.67	1.0025	0.999182	B2UL87_AKKM8	NAD-dependent epimerase/dehydratase
	AMUC_RS00165	Amuc_0030	476.27	1039.31	2.18219	7.89318e-20	B2UL88_AKKM8	Uncharacterized protein
	AMUC_RS00170	Amuc_0031	715.75	648.94	0.906657	0.235629
	AMUC_RS00175	Amuc_0032	662.802	486.318	0.73373	0.0261826	B2UL90_AKKM8	Uncharacterized protein
	AMUC_RS00180	Amuc_0033	40.7076	211.514	5.19592	2.88321e-25	B2UL91_AKKM8	Peptidase M50
	AMUC_RS00185	Amuc_0034	91.4869	1253.72	13.7038	1.64734e-127	SYP_AKKM8	Proline--tRNA ligase (EC 6.1.1.15) (Prolyl-tRNA synthetase) (ProRS)
	AMUC_RS00195	Amuc_0035	166.196	792.27	4.76709	9.18408e-52	B2UL93_AKKM8	Uncharacterized protein
	AMUC_RS00200		215.143	410.982	1.91027	2.7754e-09	A0A1Y3SXJ7_9BACT	Uncharacterized protein
	AMUC_RS00205	Amuc_0036	3576.77	3314.95	0.9268	0.240079
	AMUC_RS00210	Amuc_0037	2665.24	1134.78	0.425772	5.80309e-40	A0A1Y3SY57_9BACT	Amino acid transporter
	AMUC_RS00215	Amuc_0038	1437.75	400.14	0.278309	5.75714e-56	GLSA_AKKM8	Glutaminase (EC 3.5.1.2)
	AMUC_RS00220	Amuc_0039	19.6408	34.094	1.73588	0.0615127	B2UL97_AKKM8	GCN5-related N-acetyltransferase
	AMUC_RS00225		10.1432	6.00319	0.591846	0.292671	A0A1Y3SXK1_9BACT	Uncharacterized protein
	AMUC_RS00230	Amuc_0040	51.8191	47.2167	0.911183	0.681986	B2UL98_AKKM8	Amino acid carrier protein
	AMUC_RS00240	Amuc_0041	695.709	883.611	1.27009	0.00116252	RF1_AKKM8	Peptide chain release factor 1 (RF-1)
	AMUC_RS00245	Amuc_0042	198.565	318.897	1.60601	3.86839e-06	A0A1Y3T481_9BACT	Release factor glutamine methyltransferase (RF MTase) (EC 2.1.1.297) (N5-glutamine methyltransferase PrmC) (Protein-(glutamine-N5) MTase PrmC) (Protein-glutamine N-methyltransferase PrmC)
	AMUC_RS00250	Amuc_0043	55.1745	196.444	3.56041	1.07088e-17	B2ULA1_AKKM8	Primosomal protein N' (EC 3.6.4.-) (ATP-dependent helicase PriA)
	AMUC_RS00255	Amuc_0044	116.587	268.831	2.30584	3.27314e-11	B2ULA2_AKKM8	Diaminopimelate epimerase (DAP epimerase) (EC 5.1.1.7) (PLP-independent amino acid racemase)
	AMUC_RS00260	Amuc_0045	41.2375	12.8713	0.312125	2.16246e-05	B2ULA3_AKKM8	Uncharacterized protein
	AMUC_RS00265		3.3748	4.56874	1.35378	0.605287	A0A1Y3SY69_9BACT	Uncharacterized protein
	AMUC_RS00275	Amuc_0047	95.8628	125.688	1.31112	0.0660502	B2ULA5_AKKM8	Demethylmenaquinone methyltransferase (EC 2.1.1.163)
	AMUC_RS00280	Amuc_0048	255.823	156.687	0.61248	5.42508e-06
	AMUC_RS00300	Amuc_0051	1373.64	522.675	0.380504	1.35258e-46	B2ULA8_AKKM8	Single-stranded-DNA-specific exonuclease RecJ
	AMUC_RS00310		0.808627	1.37435	1.69961	0.786489
	AMUC_RS00315	Amuc_0053	210.618	462.14	2.19421	5.0079e-15	A0A1Y3SY79_9BACT	Zinc ABC transporter substrate-binding protein
	AMUC_RS00320	Amuc_0054	85.5793	182.059	2.12737	4.23785e-08	B2ULB1_AKKM8	Uncharacterized protein
	AMUC_RS00325	Amuc_0055	51.7944	150.635	2.90833	1.53598e-10	B2ULB2_AKKM8	ABC transporter related
	AMUC_RS00330	Amuc_0056	58.1912	196.923	3.38406	8.08517e-16	B2ULB3_AKKM8	ABC-3 protein
	AMUC_RS00335	Amuc_0057	1506.94	1004.19	0.666377	1.04425e-08	B2ULB4_AKKM8	UvrB/UvrC protein
	AMUC_RS00340	Amuc_0058	1990.53	2509.78	1.26086	0.000967308	B2ULB5_AKKM8	Protein-arginine kinase (EC 2.7.14.1)
	AMUC_RS00345	Amuc_0059	3592.04	6444.35	1.79406	3.14513e-10	B2ULB6_AKKM8	ATPase AAA-2 domain protein
	AMUC_RS00350	Amuc_0060	78.0082	63.6879	0.816425	0.300654	B2ULB7_AKKM8	Alpha-N-acetylglucosaminidase (EC 3.2.1.50)
	AMUC_RS00355		13.0315	64.206	4.927	1.81291e-08	A0A1Y3T7P1_9BACT	Uncharacterized protein
	AMUC_RS00360		7.37514	1.72647	0.234093	0.0405957
	AMUC_RS00365		47.8281	87.5843	1.83123	0.000657257
	AMUC_RS00370		49.3819	48.4789	0.981714	0.944199
	AMUC_RS00375	Amuc_0063	74.4913	102.939	1.3819	0.0789482
	AMUC_RS00380	Amuc_0064	961.667	1053.58	1.09557	0.232768	B2ULC0_AKKM8	5-oxopent-3-ene-1,2,5-tricarboxylate decarboxylase (EC 4.1.1.68)
	AMUC_RS00385	Amuc_0065	604.156	1294.82	2.14319	4.46658e-23	B2ULC1_AKKM8	2-isopropylmalate synthase (EC 2.3.3.13) (Alpha-IPM synthase) (Alpha-isopropylmalate synthase)
	AMUC_RS00390	Amuc_0066	267.291	465.545	1.74171	1.11163e-09	B2ULC2_AKKM8	Putative ATP/GTP-binding protein
	AMUC_RS00395	Amuc_0067	385.272	721.729	1.8733	2.99425e-13	B2ULC3_AKKM8	GatB/YqeY domain protein
	AMUC_RS00400	Amuc_0068	277.394	503.209	1.81406	6.04785e-09	B2ULC4_AKKM8	2-C-methyl-D-erythritol 4-phosphate cytidylyltransferase
	AMUC_RS00405	Amuc_0069	152.389	318.021	2.08691	7.41011e-12	B2ULC5_AKKM8	NAD-dependent epimerase/dehydratase
	AMUC_RS00410	Amuc_0070	296.41	324.183	1.0937	0.413087	B2ULC6_AKKM8	Tryptophan--tRNA ligase (EC 6.1.1.2) (Tryptophanyl-tRNA synthetase) (TrpRS)
	AMUC_RS00415	Amuc_0071	685.544	180.265	0.262952	8.92116e-51	B2ULC7_AKKM8	Universal stress protein
	AMUC_RS00420	Amuc_0072	312.322	143.74	0.46023	5.11419e-11
	AMUC_RS00425		36.1239	33.1541	0.917786	0.663624	A0A1Y3SYA1_9BACT	Uncharacterized protein
	AMUC_RS00430	Amuc_0073	100.63	80.6788	0.801741	0.213418	B2ULC9_AKKM8	UBA/THIF-type NAD/FAD binding protein
	AMUC_RS00435	Amuc_0074	24.7644	84.6098	3.41659	2.76177e-08	B2ULD0_AKKM8	Uncharacterized protein
	AMUC_RS00445	Amuc_0075	221.35	329.167	1.48709	0.000125599	B2ULD1_AKKM8	PfkB domain protein
	AMUC_RS00450	Amuc_0076	85.7584	62.3622	0.727185	0.0610558	B2ULD2_AKKM8	NUDIX hydrolase
	AMUC_RS00455		7.13454	1.06357	0.149074	0.0176849	A0A1Y3T237_9BACT	Uncharacterized protein
	AMUC_RS00460		20.6866	12.4746	0.603031	0.151205	A0A1Y3T4B8_9BACT	Uncharacterized protein
	AMUC_RS00465	Amuc_0077	810.414	932.403	1.15053	0.0543068	B2ULD3_AKKM8	2-amino-3-ketobutyrate coenzyme A ligase (AKB ligase) (EC 2.3.1.29) (Glycine acetyltransferase)
	AMUC_RS00470	Amuc_0078	423.213	1082.47	2.55776	3.37679e-33	A0A1Y3SXQ2_9BACT	Uncharacterized protein
	AMUC_RS00475	Amuc_0079	192.314	199.747	1.03865	0.723723	B2ULD5_AKKM8	Cobyrinic acid ac-diamide synthase
	AMUC_RS00485	Amuc_0081	551.301	133.803	0.242705	1.05279e-44	B2ULD7_AKKM8	Uncharacterized protein
	AMUC_RS00490	Amuc_0082	733.776	158.626	0.216178	5.41887e-50	B2ULD8_AKKM8	Uncharacterized protein
	AMUC_RS00495	Amuc_0083	2196.97	359.316	0.16355	6.366e-112	B2ULD9_AKKM8	Uncharacterized protein
	AMUC_RS00500	Amuc_0084	258.312	63.6153	0.246273	3.54975e-29	B2ULE0_AKKM8	Uncharacterized protein
	AMUC_RS00515	Amuc_0085	1075.33	509.932	0.474211	1.02217e-24	B2ULE1_AKKM8	Thiamine biosynthesis protein ThiS
	AMUC_RS00520	Amuc_0086	2249.12	1235.17	0.549179	2.10171e-13	MUTL_AKKM8	DNA mismatch repair protein MutL
	AMUC_RS00525		34.7104	30.9562	0.891841	0.742231	A0A1Y3T7S3_9BACT	Uncharacterized protein
	AMUC_RS00530	Amuc_0088	99.2698	96.8432	0.975555	0.793721	B2ULE4_AKKM8	Uncharacterized protein
	AMUC_RS00535	Amuc_0089	4847.06	180.083	0.0371531	0	B2ULP0_AKKM8	Uncharacterized protein
	AMUC_RS00540		8932.15	386.838	0.0433085	0	A0A1Y3SXR4_9BACT	Uncharacterized protein
	AMUC_RS00545	Amuc_0090	295.905	174.597	0.590043	4.19758e-06
	AMUC_RS00550	Amuc_0091	79.8527	125.019	1.56562	0.00529781	HEM1_AKKM8	Glutamyl-tRNA reductase (GluTR) (EC 1.2.1.70)
	AMUC_RS00555	Amuc_0092	60.5949	47.6109	0.785724	0.290808	B2ULP3_AKKM8	Cytochrome c assembly protein
	AMUC_RS00560	Amuc_0093	235.601	428.527	1.81887	3.99453e-10	GCH4_AKKM8	GTP cyclohydrolase FolE2 (EC 3.5.4.16)
	AMUC_RS00565	Amuc_0094	515.13	746.77	1.44967	2.71656e-06	B2ULP5_AKKM8	Ribosomal protein S18
	AMUC_RS00570	Amuc_0095	139.873	183.591	1.31255	0.035269	RL33_AKKM8	50S ribosomal protein L33
	AMUC_RS00580	Amuc_0097	1322.73	1118.52	0.845616	0.0165248	B2ULP8_AKKM8	ROK family protein
	AMUC_RS00585	Amuc_0098	220.512	323.039	1.46495	0.00111061	B2ULP9_AKKM8	Fmu (Sun) domain protein
	AMUC_RS00595	Amuc_0100	17.1093	70.8715	4.14228	3.17966e-08	B2ULQ1_AKKM8	NUDIX hydrolase
	AMUC_RS00600	Amuc_0102	4442.21	2710.63	0.610199	8.7631e-14	B2ULQ3_AKKM8	Efflux transporter, RND family, MFP subunit
	AMUC_RS00605	Amuc_0103	775.684	1223.36	1.57713	9.77984e-10	B2ULQ4_AKKM8	ABC transporter related
	AMUC_RS00610	Amuc_0104	572.179	783.497	1.36932	6.48178e-05	B2ULQ5_AKKM8	Uncharacterized protein
	AMUC_RS00615	Amuc_0105	193.636	587.307	3.03305	1.24152e-26	B2ULQ6_AKKM8	RND efflux system, outer membrane lipoprotein, NodT family
	AMUC_RS00620	Amuc_0106	1324.47	822.151	0.62074	3.28143e-12	B2ULQ7_AKKM8	Beta-lactamase
	AMUC_RS00625	Amuc_0107	71.0075	39.0349	0.549729	0.00324021	B2ULQ8_AKKM8	Transporter, hydrophobe/amphiphile efflux-1 (HAE1) family
	AMUC_RS00640	Amuc_0110	21.6771	29.122	1.34345	0.432868
	AMUC_RS00645	Amuc_0111	135.834	246.255	1.81291	5.02211e-06	A0A1Y3SYE7_9BACT	Uncharacterized protein
	AMUC_RS00650	Amuc_0112	165.431	148.39	0.89699	0.423576	PYRB_AKKM8	Aspartate carbamoyltransferase (EC 2.1.3.2) (Aspartate transcarbamylase) (ATCase)
	AMUC_RS00655	Amuc_0113	151.47	101.339	0.669038	0.00324879	PYRR_AKKM8	Bifunctional protein PyrR [Includes: Pyrimidine operon regulatory protein; Uracil phosphoribosyltransferase (UPRTase) (EC 2.4.2.9)]
	AMUC_RS00660	Amuc_0114	157.205	57.7305	0.36723	5.21561e-09	B2ULR5_AKKM8	N5-carboxyaminoimidazole ribonucleotide mutase (N5-CAIR mutase) (EC 5.4.99.18) (5-(carboxyamino)imidazole ribonucleotide mutase)
	AMUC_RS00665	Amuc_0115	111.004	112.425	1.0128	0.872558	A0A1Y3T2A6_9BACT	Uncharacterized protein
	AMUC_RS00670		5.53604	3.90584	0.705529	0.633636	A0A1Y3T278_9BACT	Uncharacterized protein
	AMUC_RS00675	Amuc_0116	220.456	178.172	0.808195	0.156454
	AMUC_RS00680	Amuc_0117	194.959	244.833	1.25581	0.0559724	B2ULR8_AKKM8	Agmatine deiminase (EC 3.5.3.12)
	AMUC_RS00685	Amuc_0118	881.237	431.302	0.489428	6.51161e-19	B2ULR9_AKKM8	Uncharacterized protein
	AMUC_RS00690	Amuc_0119	133.816	303.232	2.26603	5.20784e-12	B2ULS0_AKKM8	Uncharacterized protein
	AMUC_RS00695	Amuc_0120	253.11	267.63	1.05736	0.593014	B2ULS1_AKKM8	Uncharacterized protein
	AMUC_RS00700	Amuc_0121	117.112	285.068	2.43415	4.3709e-14	B2ULS2_AKKM8	Sulfatase
	AMUC_RS00705	Amuc_0122	26.5448	41.9668	1.58098	0.0800395	B2ULS3_AKKM8	Uncharacterized protein
	AMUC_RS00710		100.706	129.34	1.28434	0.0999459	A0A1Y3T000_9BACT	Uncharacterized protein
	AMUC_RS00715		17.4561	5.18294	0.296913	0.00429651	A0A1Y3SXT5_9BACT	Uncharacterized protein
	AMUC_RS00720	Amuc_0124	86.581	38.7232	0.447248	1.98743e-05	A0A1Y3T2B7_9BACT	Uncharacterized protein
	AMUC_RS00725	Amuc_0125	219.378	36.4238	0.166032	2.29423e-35	B2ULS5_AKKM8	Lipolytic protein G-D-S-L family
	AMUC_RS00740	Amuc_0127	3359.32	877.304	0.261155	1.52278e-48	B2ULS7_AKKM8	Transposase IS3/IS911 family protein
	AMUC_RS00745	Amuc_0128	593.596	560.594	0.944405	0.526792
	AMUC_RS00755		32.5913	24.32	0.746211	0.289599	A0A1Y3SXV1_9BACT	Uncharacterized protein
	AMUC_RS00765	Amuc_0130	47.0295	6.17576	0.131317	1.25273e-10	B2ULT0_AKKM8	Uncharacterized protein
	AMUC_RS00770	Amuc_0131	12.146	3.38534	0.278722	0.0199106	B2ULT1_AKKM8	Uncharacterized protein
	AMUC_RS00775		19.8392	2.02202	0.101921	1.88369e-05	A0A1Y3T012_9BACT	Uncharacterized protein
	AMUC_RS00780	Amuc_0133	515.288	127.117	0.246691	1.52636e-46	B2ULT3_AKKM8	ParB-like partition protein
	AMUC_RS00785	Amuc_0134	176.478	157.198	0.890752	0.334675	A0A1Y3T2C5_9BACT	Uncharacterized protein
	AMUC_RS00790	Amuc_0135	82.6361	62.7275	0.759081	0.173094	B2ULT5_AKKM8	Conserved hypothetical membrane protein
	AMUC_RS00795	Amuc_0136	60.47	95.4309	1.57815	0.00685815	B2ULT6_AKKM8	Uncharacterized protein
	AMUC_RS00800	Amuc_0137	302.706	260.38	0.860176	0.189071
	AMUC_RS00805	Amuc_0138	151.806	47.5982	0.313545	4.3433e-14	B2ULT8_AKKM8	Uncharacterized protein
	AMUC_RS00810	Amuc_0139	331.044	314.903	0.951242	0.588553	B2ULT9_AKKM8	Uncharacterized protein
	AMUC_RS00815	Amuc_0140	1233.02	1064.04	0.862956	0.0415615	B2ULU0_AKKM8	Tyrosine--tRNA ligase (EC 6.1.1.1)
	AMUC_RS00820	Amuc_0141	1.11202	1.55795	1.40102	0.745248
	AMUC_RS00825	Amuc_0142	7.25484	13.6544	1.88211	0.148671	B2ULU2_AKKM8	Uncharacterized protein
	AMUC_RS00830	Amuc_0143	16.3047	47.9733	2.94229	0.00013664	B2ULU3_AKKM8	Binding-protein-dependent transport systems inner membrane component
	AMUC_RS00835	Amuc_0144	22.4823	89.3738	3.9753	5.1119e-10	B2ULU4_AKKM8	Binding-protein-dependent transport systems inner membrane component
	AMUC_RS00845	Amuc_0146	239.058	104.197	0.435866	5.84406e-10
	AMUC_RS00850		117.598	13.9126	0.118306	9.38581e-23
	AMUC_RS00860	Amuc_0148	274.862	788.196	2.8676	2.09799e-29	B2ULU8_AKKM8	Saccharopine dehydrogenase
	AMUC_RS00865	Amuc_0149	127.806	95.9269	0.750564	0.0803516	B2ULU9_AKKM8	Metallophosphoesterase
	AMUC_RS00870	Amuc_0150	117.526	107.283	0.912841	0.67781	B2ULV0_AKKM8	Uncharacterized protein
	AMUC_RS00875	Amuc_0151	138.173	158.272	1.14547	0.305537
	AMUC_RS00890	Amuc_0153	1578.6	1334.59	0.845426	0.0120622	B2ULV3_AKKM8	Cell division protein FtsA
	AMUC_RS00895	Amuc_0154	277.263	394.115	1.42145	0.000283646	A0A1Y3T2H4_9BACT	Uncharacterized protein
	AMUC_RS00900	Amuc_0155	1802.73	1966.59	1.0909	0.226209
	AMUC_RS00905	Amuc_0156	46.6726	63.8756	1.36859	0.120477	B2ULV6_AKKM8	ABC transporter related
	AMUC_RS00910	Amuc_0157	205.347	131.52	0.640479	0.00040776
	AMUC_RS00915	Amuc_0158	15.9351	43.4873	2.72902	0.00105423
	AMUC_RS00920	Amuc_0159	422.087	738.914	1.75062	5.69063e-11	B2ULV9_AKKM8	Uncharacterized protein
	AMUC_RS00925	Amuc_0160	46.3733	268.363	5.78702	3.90286e-31	B2ULW0_AKKM8	ABC transporter related
	AMUC_RS00930	Amuc_0161	89.2194	413.532	4.63501	7.62262e-39	B2ULW1_AKKM8	Mammalian cell entry related domain protein
	AMUC_RS00935	Amuc_0162	2886	959.22	0.33237	2.08639e-62	B2ULW2_AKKM8	Uncharacterized protein
	AMUC_RS00940	Amuc_0163	1738.72	808.184	0.464817	7.6265e-30	B2ULW3_AKKM8	Uncharacterized protein
	AMUC_RS00945	Amuc_0164	486.682	371.298	0.762916	0.00339871	B2ULW4_AKKM8	Uncharacterized protein
	AMUC_RS00950	Amuc_0165	411.88	379.65	0.921749	0.365018	B2ULW5_AKKM8	Twitching motility protein
	AMUC_RS00955	Amuc_0166	242.754	251.467	1.03589	0.766955	B2ULW6_AKKM8	Twitching motility protein
	AMUC_RS00960	Amuc_0167	104.917	209.088	1.99289	1.99564e-07	B2ULW7_AKKM8	Peptidylprolyl isomerase (EC 5.2.1.8)
	AMUC_RS00970	Amuc_0168	904.098	397.45	0.43961	6.35517e-25	B2ULW8_AKKM8	Uncharacterized protein
	AMUC_RS00975	Amuc_0169	152.012	284.342	1.87052	1.13407e-07	B2ULW9_AKKM8	3-deoxy-manno-octulosonate cytidylyltransferase (EC 2.7.7.38) (CMP-2-keto-3-deoxyoctulosonic acid synthase) (CKS) (CMP-KDO synthase)
	AMUC_RS00980	Amuc_0170	387.144	1055.91	2.72743	4.61056e-38	B2ULX0_AKKM8	CTP synthase (EC 6.3.4.2) (Cytidine 5'-triphosphate synthase) (Cytidine triphosphate synthetase) (CTP synthetase) (CTPS) (UTP--ammonia ligase)
	AMUC_RS00985	Amuc_0171	66.7331	72.7195	1.08971	0.605569	B2ULX1_AKKM8	SSS sodium solute transporter superfamily
	AMUC_RS00990	Amuc_0172	2628.86	1607.24	0.611384	1.45269e-08	B2ULX2_AKKM8	Uncharacterized protein
	AMUC_RS00995	Amuc_0173	395.029	196.459	0.497329	6.55875e-11	B2ULX3_AKKM8	Uncharacterized protein
	AMUC_RS01000	Amuc_0174	451.402	502.771	1.1138	0.223567	B2ULX4_AKKM8	Uncharacterized protein
	AMUC_RS01005	Amuc_0175	1450.2	2168.91	1.49559	1.12115e-10	B2ULX5_AKKM8	PDZ/DHR/GLGF domain protein
	AMUC_RS01010	Amuc_0176	3779.21	2037.81	0.539215	1.65071e-12
	AMUC_RS01015	Amuc_0177	527.409	573.451	1.0873	0.32117
	AMUC_RS01020	Amuc_0178	49.5991	72.7838	1.46744	0.0461359	B2ULX8_AKKM8	Uncharacterized protein
	AMUC_RS01025	Amuc_0179	269.318	94.9611	0.352598	3.2662e-20	B2ULX9_AKKM8	HAD-superfamily hydrolase, subfamily IA, variant 3
	AMUC_RS01030	Amuc_0180	709.972	211.175	0.297442	6.47827e-48	LPXA_AKKM8	Acyl-[acyl-carrier-protein]--UDP-N-acetylglucosamine O-acyltransferase (UDP-N-acetylglucosamine acyltransferase) (EC 2.3.1.129)
	AMUC_RS01035	Amuc_0181	20.6091	70.7764	3.43424	4.58512e-07	B2ULY1_AKKM8	RDD domain containing protein
	AMUC_RS01040	Amuc_0182	113.935	373.047	3.27421	1.44714e-22
	AMUC_RS01045	Amuc_0183	82.3695	180.897	2.19616	5.62106e-09
	AMUC_RS01050	Amuc_0184	543.77	107.838	0.198316	5.96166e-48	B2UM79_AKKM8	Uncharacterized protein
	AMUC_RS01055	Amuc_0185	172.341	33.289	0.193158	1.6651e-25	B2UM80_AKKM8	Uncharacterized protein
	AMUC_RS01065	Amuc_0186	194.403	113.35	0.583066	1.40934e-05
	AMUC_RS01070	Amuc_0187	41.9212	85.8677	2.04831	0.000161589	B2UM82_AKKM8	Peptidase M28
	AMUC_RS01075	Amuc_0188	20.0023	31.668	1.58322	0.112374	B2UM83_AKKM8	Esterase/lipase-like protein
	AMUC_RS01080	Amuc_0189	850.583	2222.58	2.61301	1.04075e-37	B2UM84_AKKM8	Isoleucine--tRNA ligase (EC 6.1.1.5) (Isoleucyl-tRNA synthetase) (IleRS)
	AMUC_RS01095	Amuc_0192	22.3032	94.0707	4.21781	1.0679e-10	B2UM87_AKKM8	Uncharacterized protein
	AMUC_RS01100	Amuc_0193	36.7795	113.508	3.08618	5.7955e-07	B2UM88_AKKM8	Cysteine desulfurase (EC 2.8.1.7)
	AMUC_RS01110	Amuc_0196	232.182	721.93	3.10933	3.29985e-39	B2UM91_AKKM8	Serine/threonine protein kinase
	AMUC_RS01115	Amuc_0197	9.68072	20.8602	2.15482	0.0581171	B2UM92_AKKM8	Uncharacterized protein
	AMUC_RS01120	Amuc_0198	1110.47	937.986	0.844676	0.0526933	RL19_AKKM8	50S ribosomal protein L19
	AMUC_RS01125	Amuc_0199	139.184	145.826	1.04772	0.737192
	AMUC_RS01130	Amuc_0200	442.808	819.044	1.84966	1.65688e-14	B2UM95_AKKM8	Methylmalonyl-CoA epimerase
	AMUC_RS01135	Amuc_0201	677.177	1120.49	1.65465	1.59394e-06	B2UM96_AKKM8	Carboxyl transferase
	AMUC_RS01140	Amuc_0202	374.175	684.589	1.8296	4.21742e-06
	AMUC_RS01145	Amuc_0203	31.315	60.8038	1.94168	0.00444282
	AMUC_RS01160	Amuc_0206	570.761	1404.47	2.4607	1.26003e-37	B2UMA1_AKKM8	Succinate CoA transferase (EC 3.1.2.1)
	AMUC_RS01165	Amuc_0207	4.84771	19.8972	4.10445	0.0032969	A0A1Y3STR3_9BACT	Uncharacterized protein
	AMUC_RS01170	Amuc_0208	63.8294	109.566	1.71655	0.000665393	B2UMA3_AKKM8	Glucose-1-phosphate thymidylyltransferase (EC 2.7.7.24)
	AMUC_RS01175	Amuc_0209	298.565	256.319	0.858504	0.135042	B2UMA4_AKKM8	dTDP-glucose 4,6-dehydratase (EC 4.2.1.46)
	AMUC_RS01180	Amuc_0210	692.738	1109.58	1.60173	1.14331e-09	B2UMA5_AKKM8	6-phosphofructokinase (EC 2.7.1.11)
	AMUC_RS01185	Amuc_0211	96.1109	82.6965	0.860429	0.337191	B2UMA6_AKKM8	Uracil-DNA glycosylase superfamily
	AMUC_RS01190	Amuc_0213	116.795	389.45	3.33449	3.90237e-28	B2UMA7_AKKM8	Aspartyl/glutamyl-tRNA(Asn/Gln) amidotransferase subunit B (Asp/Glu-ADT subunit B) (EC 6.3.5.-)
	AMUC_RS01195	Amuc_0214	1462.8	161.401	0.110337	2.96283e-147
	AMUC_RS01200	Amuc_0215	357.832	69.6648	0.194686	4.0216e-46	B2UMA9_AKKM8	Uncharacterized protein
	AMUC_RS01205	Amuc_0216	431.814	396.866	0.919068	0.35867	B2UMB0_AKKM8	Uncharacterized protein
	AMUC_RS01210	Amuc_0217	17.2537	23.2971	1.35027	0.349524	B2UMB1_AKKM8	Uncharacterized protein
	AMUC_RS01215	Amuc_0218	211.915	786.622	3.71197	2.11221e-35	B2UMB2_AKKM8	Calcium-translocating P-type ATPase, PMCA-type
	AMUC_RS01220	Amuc_0219	2036.7	965.72	0.474159	3.80298e-26	B2UMB3_AKKM8	Efflux transporter, RND family, MFP subunit
	AMUC_RS01225	Amuc_0220	531.917	680.739	1.27979	0.00291742	B2UMB4_AKKM8	Transporter, hydrophobe/amphiphile efflux-1 (HAE1) family
	AMUC_RS01230	Amuc_0221	569.187	46.5989	0.0818693	1.29314e-104	B2UMB5_AKKM8	Anion transporter
	AMUC_RS01235		24.1863	187.265	7.74258	1.20001e-27	B2UMB6_AKKM8	Uncharacterized protein
	AMUC_RS01240	Amuc_0223	77.4122	145.653	1.88153	0.182887
	AMUC_RS01245	Amuc_0224	228.744	145.494	0.636057	0.000195327
	AMUC_RS01250	Amuc_0225	188.287	111.315	0.591201	1.67231e-05
	AMUC_RS01255	Amuc_0226	400.429	203.222	0.50751	4.41527e-09
	AMUC_RS01260	Amuc_0227	52.9305	94.8542	1.79205	0.0015124	A0A1Y3SRC1_9BACT	Uncharacterized protein
	AMUC_RS01265		11.6982	11.2197	0.959097	0.903694	A0A1Y3STP7_9BACT	Uncharacterized protein
	AMUC_RS01270	Amuc_0228	164.122	133.275	0.812048	0.135466	B2UMC2_AKKM8	Uncharacterized protein
	AMUC_RS01290	Amuc_0229	310.312	794.43	2.5601	1.21234e-23	B2UMC3_AKKM8	Uncharacterized protein
	AMUC_RS01295	Amuc_0230	212.035	126.211	0.595235	6.805e-05	B2UMC4_AKKM8	Short-chain dehydrogenase/reductase SDR
	AMUC_RS01300	Amuc_0231	688.218	1138.12	1.65372	6.27851e-09	B2UMC5_AKKM8	Uncharacterized protein
	AMUC_RS01305		1798.69	474.477	0.26379	7.5156e-83
	AMUC_RS01310	Amuc_0233	7601.8	1204.42	0.158438	6.24459e-148	B2UMC7_AKKM8	L-threonine 3-dehydrogenase (TDH) (EC 1.1.1.103)
	AMUC_RS01315	Amuc_0234	9.80163	2.6853	0.273964	0.0438492	B2UMC8_AKKM8	Uncharacterized protein
	AMUC_RS01320	Amuc_0235	1396.76	3158.09	2.261	1.29567e-34	B2UMC9_AKKM8	Alpha-glucan phosphorylase (EC 2.4.1.1)
	AMUC_RS01325	Amuc_0236	140.235	684.631	4.88204	6.78671e-55	B2UMD0_AKKM8	Ion transport 2 domain protein
	AMUC_RS01330	Amuc_0237	145.266	925.368	6.37017	1.00644e-81	B2UMD1_AKKM8	Arsenate reductase and related
	AMUC_RS01335	Amuc_0238	1045.8	773.213	0.739351	0.000197588	B2UMD2_AKKM8	Beta-lactamase domain protein
	AMUC_RS01340	Amuc_0239	25.154	29.1626	1.15936	0.553444	A0A1Y3SRY9_9BACT	Uncharacterized protein
	AMUC_RS01345	Amuc_0240	7063.08	2183.85	0.309193	1.95094e-33
	AMUC_RS01350	Amuc_0241	707.632	836.484	1.18209	0.0260258
	AMUC_RS01360	Amuc_0244	107.22	211.37	1.97136	5.48091e-08
	AMUC_RS01365	Amuc_0245	425.882	751.263	1.76402	6.22367e-12
	AMUC_RS01370	Amuc_0246	128.161	341.794	2.66692	1.04341e-16	B2UME0_AKKM8	Transcriptional regulator, MarR family
	AMUC_RS01375	Amuc_0247	476.175	6763.6	14.204	5.19643e-280	B2UME1_AKKM8	30S ribosomal protein S1
	AMUC_RS01380		5.2714	28.8521	5.47332	0.000169757
	AMUC_RS01385	Amuc_0248	205.513	92.5239	0.450209	6.74445e-11	B2UME2_AKKM8	Nitroreductase
	AMUC_RS01390	Amuc_0249	64.066	61.0017	0.952171	0.852667	B2UME3_AKKM8	Uncharacterized protein
	AMUC_RS01400	Amuc_0250	541.178	38.9667	0.0720034	6.45171e-105	B2UME4_AKKM8	Uncharacterized protein
	AMUC_RS01405	Amuc_0251	1093.57	100.421	0.0918288	1.77916e-121	B2UME5_AKKM8	Uncharacterized protein
	AMUC_RS01410	Amuc_0252	866.716	309.74	0.357372	6.83839e-30	B2UME6_AKKM8	Uncharacterized protein
	AMUC_RS01420	Amuc_0254	47.1779	174.809	3.70532	4.5789e-17	B2UME8_AKKM8	Xylose isomerase domain protein TIM barrel
	AMUC_RS01425	Amuc_0255	46.7936	91.366	1.95253	0.000243126	B2UME9_AKKM8	3-methyl-2-oxobutanoate hydroxymethyltransferase (EC 2.1.2.11) (Ketopantoate hydroxymethyltransferase) (KPHMT)
	AMUC_RS01430	Amuc_0256	99.41	209.619	2.10863	5.21293e-09	B2UMF0_AKKM8	2-amino-4-hydroxy-6-hydroxymethyldihydropteridine pyrophosphokinase
	AMUC_RS01435	Amuc_0257	1039.16	705.698	0.679102	9.40343e-06	DAPB_AKKM8	4-hydroxy-tetrahydrodipicolinate reductase (HTPA reductase) (EC 1.17.1.8)
	AMUC_RS01440	Amuc_0258	2980.27	1191.66	0.39985	1.40235e-33	B2UMF2_AKKM8	4-hydroxy-tetrahydrodipicolinate synthase (HTPA synthase) (EC 4.3.3.7)
	AMUC_RS01445	Amuc_0259	135.156	72.4771	0.53625	4.68177e-05	A0A1Y3SRC9_9BACT	Uncharacterized protein
	AMUC_RS01475		240.013	172.737	0.719699	0.0129977
	AMUC_RS01480	Amuc_0260	272.8	506.865	1.85801	1.08309e-07
	AMUC_RS01485		2.34433	1.25453	0.535131	0.554922	A0A1Y3SZE6_9BACT	Uncharacterized protein
	AMUC_RS01490	Amuc_0261	82.167	28.2073	0.343292	3.75338e-08
	AMUC_RS01495	Amuc_0262	40.9776	18.1257	0.442333	0.0020352
	AMUC_RS01505		1455.87	376.057	0.258304	3.05285e-62	A0A1Y3SX90_9BACT	Endoribonuclease YbeY (EC 3.1.-.-)
	AMUC_RS01510		246.188	399.577	1.62306	6.28038e-07	B2UMF8_AKKM8	Metal dependent phosphohydrolase
	AMUC_RS01515	Amuc_0265	774.88	666.07	0.859579	0.0483094	PLSX_AKKM8	Phosphate acyltransferase (EC 2.3.1.n2) (Acyl-ACP phosphotransacylase) (Acyl-[acyl-carrier-protein]--phosphate acyltransferase) (Phosphate-acyl-ACP acyltransferase)
	AMUC_RS01520	Amuc_0266	1165.1	554.836	0.476214	0.0155832	RL32_AKKM8	50S ribosomal protein L32
	AMUC_RS01525	Amuc_0267	1380.91	1538.31	1.11399	0.20693	A0A1Y3SV13_9BACT	Uncharacterized protein
	AMUC_RS01530	Amuc_0268	345.645	101.654	0.294099	1.75432e-31	B2UMG2_AKKM8	Histidine triad (HIT) protein
	AMUC_RS01535	Amuc_0269	250.875	340.23	1.35617	0.00428823	B2UMG3_AKKM8	Threonylcarbamoyl-AMP synthase (TC-AMP synthase) (EC 2.7.7.87) (L-threonylcarbamoyladenylate synthase)
	AMUC_RS01540	Amuc_0270	1549.65	139.478	0.0900062	3.15244e-134
	AMUC_RS01545	Amuc_0271	499.54	388.831	0.778378	0.00337807	RS16_AKKM8	30S ribosomal protein S16
	AMUC_RS01550		37.3422	15.8787	0.425223	0.00184666	A0A1Y3SZI0_9BACT	Uncharacterized protein
	AMUC_RS01555		82.0373	40.2126	0.490174	0.000733289	A0A1Y3SUX2_9BACT	Uncharacterized protein
	AMUC_RS01560	Amuc_0273	1738.09	704.601	0.405387	4.38415e-32	B2UMQ9_AKKM8	Tyrosine recombinase XerC
	AMUC_RS01565	Amuc_0274	9421.93	2335.22	0.247849	4.52225e-112
	AMUC_RS01570		998.164	870.534	0.872136	0.0812088	B2UMR1_AKKM8	Preprotein translocase, YajC subunit
	AMUC_RS01575	Amuc_0276	291.142	214.741	0.737582	0.00768116	B2UMR2_AKKM8	Queuine tRNA-ribosyltransferase (EC 2.4.2.29) (Guanine insertion enzyme) (tRNA-guanine transglycosylase)
	AMUC_RS01580	Amuc_0277	53.532	79.6559	1.48801	0.0753374	B2UMR3_AKKM8	tRNA (guanine-N(7)-)-methyltransferase (EC 2.1.1.33) (tRNA (guanine(46)-N(7))-methyltransferase) (tRNA(m7G46)-methyltransferase)
	AMUC_RS01585	Amuc_0278	530.225	346.299	0.653116	3.0942e-07	B2UMR4_AKKM8	NUDIX hydrolase
	AMUC_RS01595	Amuc_0280	92.0583	148.248	1.61037	0.000805016	A0A1Y3SV43_9BACT	Ribonuclease (EC 3.1.26.-)
	AMUC_RS01600	Amuc_0281	2955.99	2815.05	0.952322	0.541762	B2UMR7_AKKM8	Histone family protein DNA-binding protein
	AMUC_RS01605		1432.74	605.632	0.422708	5.66084e-32	A0A1Y3SZD2_9BACT	Uncharacterized protein
	AMUC_RS01610	Amuc_0283	685.847	423.96	0.618156	5.13017e-09	B2UMR9_AKKM8	Uncharacterized protein
	AMUC_RS01615	Amuc_0284	1150.65	758.054	0.658803	3.02465e-07	B2UMS0_AKKM8	Uncharacterized protein
	AMUC_RS01620		16.3869	35.989	2.1962	0.00665268	A0A1Y3SX62_9BACT	Uncharacterized protein
	AMUC_RS01625	Amuc_0285	54.1586	105.405	1.94623	0.000202641	B2UMS1_AKKM8	Uncharacterized protein
	AMUC_RS01630	Amuc_0286	197.54	306.06	1.54936	2.90685e-05	B2UMS2_AKKM8	Uncharacterized protein
	AMUC_RS01635	Amuc_0287	271.784	239.644	0.881742	0.306906	B2UMS3_AKKM8	MotA/TolQ/ExbB proton channel
	AMUC_RS01645	Amuc_0289	686.109	1533.99	2.23578	5.18733e-27
	AMUC_RS01650		12.1453	29.5402	2.43223	0.0166997	A0A1Y3T515_9BACT	Uncharacterized protein
	AMUC_RS01655		2557.07	2301.9	0.90021	0.20368	B2UMS6_AKKM8	Glycoside hydrolase family 2 sugar binding
	AMUC_RS01660	Amuc_0291	201.661	1181.53	5.85898	1.20182e-91	B2UMS7_AKKM8	Valine--tRNA ligase (EC 6.1.1.9) (Valyl-tRNA synthetase) (ValRS)
	AMUC_RS01665	Amuc_0292	119.159	182.38	1.53056	0.000860468	B2UMS8_AKKM8	Uncharacterized protein
	AMUC_RS01670		8.58808	4.7299	0.550752	0.258112	A0A1Y3SUV4_9BACT	Uncharacterized protein
	AMUC_RS01675	Amuc_0293	114.123	1037.07	9.08729	4.53214e-109	RL14_AKKM8	50S ribosomal protein L14
	AMUC_RS01680	Amuc_0294	26.1986	691.555	26.3967	1.98032e-90	B2UMT0_AKKM8	30S ribosomal protein S17
	AMUC_RS01685	Amuc_0295	7.35576	301.684	41.0134	9.89904e-40	B2UMT1_AKKM8	50S ribosomal protein L29
	AMUC_RS01690	Amuc_0296	18.7506	323.956	17.2771	1.18748e-49	RL16_AKKM8	50S ribosomal protein L16
	AMUC_RS01695	Amuc_0297	45.6028	653.582	14.3321	3.56714e-89	RS3_AKKM8	30S ribosomal protein S3
	AMUC_RS01700	Amuc_0298	32.5092	369.044	11.352	2.34052e-54	RL22_AKKM8	50S ribosomal protein L22
	AMUC_RS01705	Amuc_0299	98.0575	196.364	2.00254	4.95381e-07	B2UMT5_AKKM8	Uncharacterized protein
	AMUC_RS01710	Amuc_0300	32.423	240.843	7.42818	1.84946e-32	RS19_AKKM8	30S ribosomal protein S19
	AMUC_RS01715	Amuc_0301	80.6842	1779.75	22.0582	8.28616e-191	RL2_AKKM8	50S ribosomal protein L2
	AMUC_RS01720	Amuc_0302	21.9189	548.478	25.0231	9.49391e-77	RL23_AKKM8	50S ribosomal protein L23
	AMUC_RS01725	Amuc_0303	45.6088	1537.84	33.718	1.74941e-166	B2UMT9_AKKM8	50S ribosomal protein L4
	AMUC_RS01730	Amuc_0304	77.3086	745.717	9.64598	1.96374e-86	RL3_AKKM8	50S ribosomal protein L3
	AMUC_RS01735	Amuc_0305	25.3746	916.211	36.1074	1.16337e-112	RS10_AKKM8	30S ribosomal protein S10
	AMUC_RS01740	Amuc_0306	367.457	3105.77	8.45209	4.84319e-176	B2UMU2_AKKM8	Elongation factor G (EF-G)
	AMUC_RS01745	Amuc_0307	133.501	682.85	5.11495	1.093e-56	RS7_AKKM8	30S ribosomal protein S7
	AMUC_RS01750	Amuc_0308	785.797	1936.59	2.4645	1.24709e-39	RS12_AKKM8	30S ribosomal protein S12
	AMUC_RS01755	Amuc_0309	1336.59	2906.54	2.17459	1.16794e-35	GPMI_AKKM8	2,3-bisphosphoglycerate-independent phosphoglycerate mutase (BPG-independent PGAM) (Phosphoglyceromutase) (iPGM) (EC 5.4.2.12)
	AMUC_RS01765	Amuc_0311	504.445	205.167	0.406719	4.40906e-21	B2UMU7_AKKM8	Signal transduction histidine kinase, nitrogen specific, NtrB
	AMUC_RS01770	Amuc_0312	228.538	198.972	0.87063	0.247276	B2UMU8_AKKM8	Two component, sigma54 specific, transcriptional regulator, Fis family
	AMUC_RS01775	Amuc_0313	685.574	317.788	0.463535	5.99328e-20	B2UMU9_AKKM8	Uncharacterized protein
	AMUC_RS01780	Amuc_0314	16.5266	98.6739	5.97062	8.15445e-14	EX7S_AKKM8	Exodeoxyribonuclease 7 small subunit (EC 3.1.11.6) (Exodeoxyribonuclease VII small subunit) (Exonuclease VII small subunit)
	AMUC_RS01785	Amuc_0315	73.698	237.129	3.21758	3.03618e-17	B2UMV1_AKKM8	1-deoxy-D-xylulose-5-phosphate synthase (EC 2.2.1.7) (1-deoxyxylulose-5-phosphate synthase) (DXP synthase) (DXPS)
	AMUC_RS01790	Amuc_0316	68.9906	257.064	3.72607	1.22528e-21	B2UMV2_AKKM8	TPR repeat-containing protein
	AMUC_RS01795	Amuc_0317	25.3559	134.205	5.29285	5.67185e-18	B2UMV3_AKKM8	DNA repair protein RecO
	AMUC_RS01800	Amuc_0318	180.629	223.62	1.23801	0.0541642	B2UMV4_AKKM8	Permease YjgP/YjgQ family protein
	AMUC_RS01805	Amuc_0319	672.793	609.611	0.906091	0.265992	DER_AKKM8	GTPase Der (GTP-binding protein EngA)
	AMUC_RS01810	Amuc_0320	91.5691	222.918	2.43443	6.92133e-11	B2UMV6_AKKM8	Oligopeptide/dipeptide ABC transporter, ATPase subunit
	AMUC_RS01815	Amuc_0321	123.592	37.3681	0.30235	7.99911e-12	A0A1Y3SZ89_9BACT	Uncharacterized protein
	AMUC_RS01825		295.588	47.3473	0.16018	3.14257e-46	A0A1Y3SZC9_9BACT	DNA-binding protein
	AMUC_RS01830	Amuc_0325	210.128	611.141	2.90842	4.75047e-16	B2UMV9_AKKM8	Uncharacterized protein
	AMUC_RS01835	Amuc_0326	117.575	1015.71	8.63883	1.49592e-97	B2UMW0_AKKM8	Uncharacterized protein
	AMUC_RS01840	Amuc_0327	44.1158	365.854	8.29304	2.02434e-43	B2UMW1_AKKM8	Uncharacterized protein
	AMUC_RS01845	Amuc_0328	349.9	3031.95	8.66518	7.43491e-124	B2UMW2_AKKM8	Uncharacterized protein
	AMUC_RS01850	Amuc_0329	1104.49	1282.71	1.16136	0.116525
	AMUC_RS01860	Amuc_0332	826.661	290.295	0.351166	2.71453e-28	B2UMW5_AKKM8	Uncharacterized protein
	AMUC_RS01865	Amuc_0333	136.709	66.6286	0.487374	5.14266e-06	B2UMW6_AKKM8	Chloramphenicol acetyltransferase
	AMUC_RS01870	Amuc_0334	82.2673	357.793	4.34916	7.41851e-34	B2UMW7_AKKM8	Uncharacterized protein
	AMUC_RS01875	Amuc_0335	90.248	344.504	3.81731	1.20531e-26	B2UMW8_AKKM8	ABC transporter related
	AMUC_RS01880	Amuc_0336	222.679	1735.48	7.79362	1.53302e-118
	AMUC_RS01885	Amuc_0337	335.098	633.353	1.89005	1.12379e-13
	AMUC_RS01890	Amuc_0338	1478.62	1398.13	0.945559	0.455026	A0A1Y3SVE5_9BACT	Uncharacterized protein
	AMUC_RS01895	Amuc_0339	587.586	715.366	1.21747	0.0130095	B2UMX2_AKKM8	Phospholipid/glycerol acyltransferase
	AMUC_RS01900	Amuc_0340	33.7475	52.6122	1.55899	0.150545	B2UMX3_AKKM8	CMP/dCMP deaminase zinc-binding
	AMUC_RS01905	Amuc_0341	136.399	37.9926	0.278541	5.58697e-15	A0A1Y3T4V8_9BACT	Uncharacterized protein
	AMUC_RS01910	Amuc_0342	896.095	277.078	0.309206	3.28816e-40	B2UMX5_AKKM8	OsmC family protein
	AMUC_RS01915	Amuc_0343	681.897	1350.33	1.98025	2.64116e-18
	AMUC_RS01920	Amuc_0344	246.497	114.005	0.462499	2.02245e-11	B2UMX7_AKKM8	Lipolytic protein G-D-S-L family
	AMUC_RS01925	Amuc_0345	30.338	48.0285	1.58312	0.125833
	AMUC_RS01930	Amuc_0346	355.658	652.371	1.83427	4.40047e-10	B2UMX9_AKKM8	DNA mismatch repair protein MutS
	AMUC_RS01935		5.59417	12.3548	2.20852	0.127104	A0A1Y3SUW7_9BACT	Uncharacterized protein
	AMUC_RS01940	Amuc_0347	103.103	212.772	2.06368	4.72723e-09	B2UMY0_AKKM8	Ribosomal silencing factor RsfS
	AMUC_RS01955	Amuc_0350	230.243	149.832	0.650757	0.00466611
	AMUC_RS01965	Amuc_0351	309.969	624.413	2.01443	1.00799e-08	B2UMY4_AKKM8	1,4-dihydroxy-2-naphthoyl-CoA synthase (DHNA-CoA synthase) (EC 4.1.3.36)
	AMUC_RS01970	Amuc_0352	73.4627	260.041	3.53976	8.14106e-22	B2UMY5_AKKM8	Uncharacterized protein
	AMUC_RS01980	Amuc_0354	470.373	274.484	0.583545	4.67598e-08	B2UMY7_AKKM8	Uncharacterized protein
	AMUC_RS01985	Amuc_0355	408.252	862.458	2.11256	4.97838e-22	B2UMY8_AKKM8	Uncharacterized protein
	AMUC_RS01990	Amuc_0356	234.283	442.126	1.88714	5.83622e-11	B2UMY9_AKKM8	Uncharacterized protein
	AMUC_RS01995	Amuc_0357	92.3389	83.4358	0.903583	0.588553	A0A1Y3SVD0_9BACT	ABC transporter permease
	AMUC_RS02000	Amuc_0358	257.193	189.841	0.738124	0.00629257
	AMUC_RS02005	Amuc_0359	612.859	432.89	0.706345	3.42463e-05	B2UMZ2_AKKM8	Uncharacterized protein
	AMUC_RS02010		1143.92	811.964	0.709807	1.44698e-05	A0A1Y3T4U0_9BACT	Uncharacterized protein
	AMUC_RS02015		111.675	19.0171	0.170289	3.45493e-17	A0A1Y3T1G2_9BACT	Uncharacterized protein
	AMUC_RS02020	Amuc_0361	1487.55	390.944	0.262811	2.43647e-58	B2UMZ4_AKKM8	ABC transporter related
	AMUC_RS02025	Amuc_0362	519.529	1021.52	1.96624	3.38501e-12	B2UMZ5_AKKM8	Uncharacterized protein
	AMUC_RS02030	Amuc_0363	39.9184	154.429	3.86861	4.75068e-15
	AMUC_RS02035	Amuc_0364	40.8667	260.857	6.38311	2.03002e-32	B2UMZ7_AKKM8	Uncharacterized protein
	AMUC_RS02040		102.15	140.936	1.37969	0.0907685	B2UMZ8_AKKM8	Squalene/phytoene synthase
	AMUC_RS02045	Amuc_0366	873.575	1093.69	1.25197	0.00300652	B2UMZ9_AKKM8	Transcriptional regulator, NifA subfamily, Fis Family
	AMUC_RS02050	Amuc_0367	1463.06	225.853	0.15437	1.25933e-128	B2UN00_AKKM8	Chloride channel core
	AMUC_RS02055	Amuc_0368	887.592	70.9163	0.0798974	2.02843e-127	B2UN01_AKKM8	Uncharacterized protein
	AMUC_RS02065	Amuc_0370	523.354	218.826	0.418123	6.85169e-18	B2UN03_AKKM8	Uncharacterized protein
	AMUC_RS02070	Amuc_0371	292.213	305.476	1.04539	0.65952	B2UN98_AKKM8	Two component regulator propeller domain protein
	AMUC_RS02075	Amuc_0372	27854.9	6693.31	0.240292	1.306e-98	B2UN99_AKKM8	Glutamate decarboxylase (EC 4.1.1.15)
	AMUC_RS02080	Amuc_0373	76.4578	98.9463	1.29413	0.0979833	B2UNA0_AKKM8	GCN5-related N-acetyltransferase
	AMUC_RS02085	Amuc_0374	424.716	1744.35	4.1071	1.47484e-57	B2UNA1_AKKM8	DNA-directed DNA polymerase (EC 2.7.7.7)
	AMUC_RS02090	Amuc_0375	333.751	650.912	1.95029	6.17919e-12	PYRD_AKKM8	Dihydroorotate dehydrogenase (quinone) (EC 1.3.5.2) (DHOdehase) (DHOD) (DHODase) (Dihydroorotate oxidase)
	AMUC_RS02095	Amuc_0376	48.9395	130.445	2.66543	2.91166e-09
	AMUC_RS02105	Amuc_0378	1161.28	339.527	0.292373	3.25603e-35
	AMUC_RS02110	Amuc_0379	507.234	275.96	0.544048	8.36742e-11	B2UNA6_AKKM8	Cytochrome C family protein
	AMUC_RS02115	Amuc_0380	90.1001	217.676	2.41593	4.73046e-11	B2UNA7_AKKM8	Uncharacterized protein
	AMUC_RS02120	Amuc_0381	232.89	363.072	1.55898	9.02061e-06	B2UNA8_AKKM8	Uncharacterized protein
	AMUC_RS02125		47.0963	6.13442	0.130253	8.70429e-11
	AMUC_RS02130	Amuc_0382	5068.07	10921.3	2.15491	9.10325e-44	PNP_AKKM8	Polyribonucleotide nucleotidyltransferase (EC 2.7.7.8) (Polynucleotide phosphorylase) (PNPase)
	AMUC_RS02135	Amuc_0383	303.407	567.45	1.87026	1.45761e-11	RS15_AKKM8	30S ribosomal protein S15
	AMUC_RS02140	Amuc_0384	922.41	851.698	0.923341	0.310584
	AMUC_RS02150	Amuc_0386	43.5297	50.1982	1.15319	0.563787	B2UNB3_AKKM8	Uncharacterized protein
	AMUC_RS02155	Amuc_0387	94.4327	150.728	1.59615	0.000664665	B2UNB4_AKKM8	Uncharacterized protein
	AMUC_RS02160	Amuc_0388	7.37047	42.2774	5.73605	2.06389e-06	B2UNB5_AKKM8	Uncharacterized protein
	AMUC_RS02165	Amuc_0389	43.1529	76.1575	1.76483	0.00684166	TRUA_AKKM8	tRNA pseudouridine synthase A (EC 5.4.99.12) (tRNA pseudouridine(38-40) synthase) (tRNA pseudouridylate synthase I) (tRNA-uridine isomerase I)
	AMUC_RS02170	Amuc_0390	49.3686	79.9816	1.62009	0.0174628	B2UNB7_AKKM8	Probable nicotinate-nucleotide adenylyltransferase (EC 2.7.7.18) (Deamido-NAD(+) diphosphorylase) (Deamido-NAD(+) pyrophosphorylase) (Nicotinate mononucleotide adenylyltransferase) (NaMN adenylyltransferase)
	AMUC_RS02175	Amuc_0391	205.536	256.325	1.2471	0.0427116	B2UNB8_AKKM8	Peptidase M23
	AMUC_RS02180	Amuc_0392	820.426	1185.3	1.44474	3.50461e-07	B2UNB9_AKKM8	Coagulation factor 5/8 type domain protein
	AMUC_RS02185	Amuc_0393	17.6239	10.5535	0.598821	0.217352	B2UNC0_AKKM8	Uncharacterized protein
	AMUC_RS02190	Amuc_0394	20195.9	2747.98	0.136066	2.19166e-166	B2UNC1_AKKM8	Uncharacterized protein
	AMUC_RS02195	Amuc_0395	1086.75	1072.87	0.98723	0.848965
	AMUC_RS02200	Amuc_0396	63.5127	221.694	3.49054	1.08709e-17
	AMUC_RS02205	Amuc_0397	86.9125	91.503	1.05282	0.757887	B2UNC4_AKKM8	Beta-N-acetylhexosaminidase (EC 3.2.1.52)
	AMUC_RS02210	Amuc_0398	108.924	546.839	5.02039	1.24484e-50	BIOD_AKKM8	ATP-dependent dethiobiotin synthetase BioD (EC 6.3.3.3) (DTB synthetase) (DTBS) (Dethiobiotin synthase)
	AMUC_RS02215	Amuc_0400	262.86	70.0237	0.266392	3.09611e-19	B2UNC7_AKKM8	Diadenylate cyclase (DAC) (EC 2.7.7.85) (Cyclic-di-AMP synthase) (c-di-AMP synthase)
	AMUC_RS02220	Amuc_0401	95.6343	57.3512	0.599692	0.00297809	B2UNC8_AKKM8	Uncharacterized protein
	AMUC_RS02225		30.2223	99.4635	3.29106	4.2061e-09
	AMUC_RS02230	Amuc_0403	149.39	499.919	3.3464	3.00781e-28	B2UNC9_AKKM8	ABC transporter related
	AMUC_RS02235	Amuc_0404	262.217	184.981	0.705451	0.0010506	PANC_AKKM8	Pantothenate synthetase (PS) (EC 6.3.2.1) (Pantoate--beta-alanine ligase) (Pantoate-activating enzyme)
	AMUC_RS02240	Amuc_0405	1756.7	5421.2	3.08601	7.01903e-50
	AMUC_RS02245	Amuc_0406	632.983	410.75	0.648911	4.89266e-07	B2UND2_AKKM8	UDP-3-O-acylglucosamine N-acyltransferase (EC 2.3.1.-)
	AMUC_RS02250	Amuc_0407	310.13	132.943	0.428667	1.02039e-15	B2UND3_AKKM8	Binding-protein-dependent transport systems inner membrane component
	AMUC_RS02255	Amuc_0408	774.463	249.457	0.322103	3.45907e-45	B2UND4_AKKM8	ABC transporter related
	AMUC_RS02260	Amuc_0409	5967.71	807.588	0.135326	1.10741e-256	B2UND5_AKKM8	Putative substrate-binding protein of aliphatic sulfonate ABC transporter
	AMUC_RS02265	Amuc_0410	47.236	97.3511	2.06095	3.04435e-05	B2UND6_AKKM8	Uncharacterized protein
	AMUC_RS02270	Amuc_0411	698.625	216.965	0.310559	3.0024e-27	A0A1Y3SUM2_9BACT	Uncharacterized protein
	AMUC_RS02275		53.8687	8.75962	0.16261	5.54319e-11	A0A1Y3T4P3_9BACT	Uncharacterized protein
	AMUC_RS02280	Amuc_0413	124.733	135.655	1.08756	0.590344	B2UND9_AKKM8	D,D-heptose 1,7-bisphosphate phosphatase (EC 3.1.3.-)
	AMUC_RS02285	Amuc_0414	100.503	140.476	1.39773	0.0379301	GMHA_AKKM8	Phosphoheptose isomerase (EC 5.3.1.28) (Sedoheptulose 7-phosphate isomerase)
	AMUC_RS02290	Amuc_0415	501.031	355.23	0.708997	0.000111457	B2UNE1_AKKM8	Bifunctional protein HldE [Includes: D-beta-D-heptose 1-phosphate adenylyltransferase (EC 2.7.7.70) (D-glycero-beta-D-manno-heptose 1-phosphate adenylyltransferase); D-beta-D-heptose 7-phosphate kinase (EC 2.7.1.167) (D-beta-D-heptose 7-phosphotransferase) (D-glycero-beta-D-manno-heptose-7-phosphate kinase)]
	AMUC_RS02295		5.33419	2.24697	0.421238	0.260247	A0A1Y3SUJ2_9BACT	Uncharacterized protein
	AMUC_RS02300	Amuc_0416	263.556	1267.57	4.80948	4.96579e-70	RS21_AKKM8	30S ribosomal protein S21
	AMUC_RS02305	Amuc_0417	54.136	51.0666	0.943303	0.829437	GSA_AKKM8	Glutamate-1-semialdehyde 2,1-aminomutase (GSA) (EC 5.4.3.8) (Glutamate-1-semialdehyde aminotransferase) (GSA-AT)
	AMUC_RS02310	Amuc_0418	264.195	482.929	1.82793	4.15118e-10	B2UNE4_AKKM8	Ankyrin
	AMUC_RS02315		8.68962	5.04474	0.580548	0.390704	A0A1Y3SUN5_9BACT	Uncharacterized protein
	AMUC_RS02320	Amuc_0419	780.245	639.091	0.819091	0.0147688
	AMUC_RS02325		4.58774	8.26486	1.80151	0.295586	A0A1Y3SUL0_9BACT	Uncharacterized protein
	AMUC_RS02330	Amuc_0420	730.525	457.488	0.626246	7.64183e-08	A0A1Y3T4M9_9BACT	Uncharacterized protein
	AMUC_RS02335	Amuc_0421	247.318	753.09	3.04502	2.7979e-39	B2UNE7_AKKM8	Glutamine--tRNA ligase (EC 6.1.1.18) (Glutaminyl-tRNA synthetase) (GlnRS)
	AMUC_RS02340	Amuc_0422	74.4545	561.526	7.54186	4.747e-54	B2UNE8_AKKM8	Riboflavin biosynthesis protein RibBA [Includes: GTP cyclohydrolase-2 (EC 3.5.4.25) (GTP cyclohydrolase II); 3,4-dihydroxy-2-butanone 4-phosphate synthase (DHBP synthase) (EC 4.1.99.12)]
	AMUC_RS02345	Amuc_0423	12.0444	144.248	11.9763	1.21079e-23	B2UNE9_AKKM8	6,7-dimethyl-8-ribityllumazine synthase (DMRL synthase) (LS) (Lumazine synthase) (EC 2.5.1.78)
	AMUC_RS02355	Amuc_0425	14.529	100.587	6.92319	1.14716e-15	B2UNF1_AKKM8	Signal recognition particle-docking protein FtsY
	AMUC_RS02360	Amuc_0426	37.5981	139.712	3.71594	4.27326e-13	RLMN_AKKM8	Probable dual-specificity RNA methyltransferase RlmN (EC 2.1.1.192) (23S rRNA (adenine(2503)-C(2))-methyltransferase) (23S rRNA m2A2503 methyltransferase) (Ribosomal RNA large subunit methyltransferase N) (tRNA (adenine(37)-C(2))-methyltransferase) (tRNA m2A37 methyltransferase)
	AMUC_RS02365	Amuc_0427	638.731	399.402	0.625305	3.8392e-09	B2UNF3_AKKM8	Replicative DNA helicase (EC 3.6.4.12)
	AMUC_RS02370	Amuc_0428	648.548	770.997	1.1888	0.0481223	B2UNF4_AKKM8	Uncharacterized protein
	AMUC_RS02375	Amuc_0429	5.61759	18.7206	3.3325	0.0142632
	AMUC_RS02380	Amuc_0430	115.817	352.908	3.04712	1.89949e-21
	AMUC_RS02385	Amuc_0431	1441.05	841.241	0.583769	1.35654e-15	B2UNF7_AKKM8	Pyruvate kinase (EC 2.7.1.40)
	AMUC_RS02390	Amuc_0432	43.4034	104.354	2.40428	6.42035e-07	B2UNF8_AKKM8	GCN5-related N-acetyltransferase
	AMUC_RS02395	Amuc_0433	165.908	90.689	0.546621	0.00052872	B2UNF9_AKKM8	Uncharacterized protein
	AMUC_RS02400	Amuc_0434	67.3633	151.225	2.24492	3.43691e-08	B2UNG0_AKKM8	Uncharacterized protein
	AMUC_RS02405	Amuc_0435	4996.45	2781.56	0.556706	4.19993e-23	B2UNG1_AKKM8	Uncharacterized protein
	AMUC_RS02410	Amuc_0436	812.882	302.721	0.372405	2.44627e-28	B2UNG2_AKKM8	HAD-superfamily subfamily IB hydrolase, TIGR01490
	AMUC_RS02415	Amuc_0437	331.982	461.116	1.38898	0.000303053	RS4_AKKM8	30S ribosomal protein S4
	AMUC_RS02420	Amuc_0438	133.254	834.524	6.26267	8.80014e-56	B2UNG4_AKKM8	30S ribosomal protein S11
	AMUC_RS02425	Amuc_0439	378.127	1951.45	5.16083	1.52567e-100	RS13_AKKM8	30S ribosomal protein S13
	AMUC_RS02430	Amuc_0440	116.753	67.5478	0.578551	0.000671996
	AMUC_RS02435	Amuc_0441	804.151	272.498	0.338864	1.98052e-38
	AMUC_RS02440	Amuc_0442	58.6109	92.2246	1.57351	0.0093256
	AMUC_RS02445	Amuc_0443	31.5368	27.619	0.875769	0.586758	B2UNG9_AKKM8	DNA protecting protein DprA
	AMUC_RS02450	Amuc_0444	181.611	195.227	1.07498	0.650023
	AMUC_RS02455	Amuc_0445	154.055	312.23	2.02674	1.25273e-10	B2UNH1_AKKM8	Ribosome-binding ATPase YchF
	AMUC_RS02460	Amuc_0446	647.279	713.954	1.10301	0.234155	B2UNH2_AKKM8	Aminomethyltransferase (EC 2.1.2.10) (Glycine cleavage system T protein)
	AMUC_RS02465	Amuc_0447	326.839	633.285	1.93761	9.26214e-15	B2UNH3_AKKM8	Glycine cleavage system H protein
	AMUC_RS02470	Amuc_0448	254.497	663.729	2.60801	2.4876e-23	GCSP_AKKM8	Glycine dehydrogenase (decarboxylating) (EC 1.4.4.2) (Glycine cleavage system P-protein) (Glycine decarboxylase) (Glycine dehydrogenase (aminomethyl-transferring))
	AMUC_RS02475	Amuc_0449	30.9507	21.1104	0.682066	0.221524	B2UNH5_AKKM8	Uncharacterized protein
	AMUC_RS02485	Amuc_0451	281.984	160.305	0.568491	6.54196e-07	B2UNH7_AKKM8	Sulfatase
	AMUC_RS02490		28.158	26.9193	0.95601	0.854191	A0A1Y3T4J9_9BACT	Uncharacterized protein
	AMUC_RS02495	Amuc_0452	220.574	605.53	2.74525	8.76131e-26	A0A1Y3T185_9BACT	Uncharacterized protein
	AMUC_RS02500	Amuc_0453	79.0221	233.018	2.94877	1.30241e-15	B2UNH9_AKKM8	Uncharacterized protein
	AMUC_RS02505	Amuc_0454	38.5123	359.198	9.32684	4.21732e-47	B2UNI0_AKKM8	Uncharacterized protein
	AMUC_RS02510	Amuc_0455	38.1227	229.189	6.01186	9.28173e-28	B2UNI1_AKKM8	Lipolytic protein G-D-S-L family
	AMUC_RS02515	Amuc_0456	1566.56	132.026	0.0842775	1.22162e-179	B2UNI2_AKKM8	DoxX family protein
	AMUC_RS02520	Amuc_0457	2192.34	1890.92	0.86251	0.0619938	B2UNI3_AKKM8	Phosphoribosylformylglycinamidine cyclo-ligase (EC 6.3.3.1)
	AMUC_RS02525	Amuc_0458	611.767	1196.18	1.95529	1.63693e-16	B2UNI4_AKKM8	Glutamine amidotransferase class-II
	AMUC_RS02530	Amuc_0459	1309.32	1676.36	1.28033	0.000556187	B2UNI5_AKKM8	RNA polymerase, sigma-24 subunit, ECF subfamily
	AMUC_RS02535	Amuc_0460	162650	11433.6	0.0702957	2.67269e-272	B2UNI6_AKKM8	Uncharacterized protein
	AMUC_RS02540	Amuc_0461	17622	3660.65	0.207731	1.02432e-104	B2UNI7_AKKM8	PDZ/DHR/GLGF domain protein
	AMUC_RS02545	Amuc_0462	794.418	443.407	0.558154	8.80934e-10	B2UNI8_AKKM8	Uncharacterized protein
	AMUC_RS02550	Amuc_0463	650.642	330.047	0.507263	3.8225e-15	B2UNI9_AKKM8	Phosphopantothenoylcysteine decarboxylase (EC 4.1.1.36)
	AMUC_RS02555	Amuc_0464	847.466	1426.08	1.68276	2.94311e-14
	AMUC_RS02560	Amuc_0465	387.625	586.616	1.51336	2.00739e-06	B2UNJ1_AKKM8	Peptidase M23
	AMUC_RS02565	Amuc_0466	494.895	653.062	1.3196	0.000947185	B2UNJ2_AKKM8	TPR repeat-containing protein
	AMUC_RS02575	Amuc_0468	1920.54	650.989	0.338962	2.42747e-45	B2UNT6_AKKM8	Transcriptional regulator, DeoR family
	AMUC_RS02580	Amuc_0469	79.9389	41.7346	0.522082	0.000555251	B2UNT7_AKKM8	GCN5-related N-acetyltransferase
	AMUC_RS02585	Amuc_0470	116.394	149.177	1.28165	0.06397
	AMUC_RS02590	Amuc_0471	87.7646	91.5314	1.04292	0.880698	B2UNT9_AKKM8	Phosphopantothenate--cysteine ligase (EC 6.3.2.5)
	AMUC_RS02595	Amuc_0472	596.341	602.662	1.0106	0.873078	B2UNU0_AKKM8	Small ribosomal subunit biogenesis GTPase RsgA (EC 3.6.1.-)
	AMUC_RS02600	Amuc_0473	207.375	350.613	1.69072	1.50229e-07	B2UNU1_AKKM8	Uncharacterized protein
	AMUC_RS02605	Amuc_0474	221.798	220.976	0.996292	0.949576	B2UNU2_AKKM8	Three-deoxy-D-manno-octulosonic-acid transferase domain protein
	AMUC_RS02610	Amuc_0475	284.032	176.868	0.622702	1.53242e-05	B2UNU3_AKKM8	Methyltransferase
	AMUC_RS02615	Amuc_0476	1399.59	805.081	0.575228	1.13619e-11
	AMUC_RS02620		2632.2	289.457	0.109968	1.32443e-216	A0A1Y3SUE1_9BACT	Uncharacterized protein
	AMUC_RS02625	Amuc_0478	9991.04	741.207	0.0741872	1.03299e-235	B2UNU6_AKKM8	Uncharacterized protein
	AMUC_RS02630	Amuc_0479	14.8899	33.6966	2.26304	0.00833962	B2UNU7_AKKM8	Uncharacterized protein
	AMUC_RS02635		7.67852	18.5188	2.41177	0.0348973
	AMUC_RS02640		1856.57	854.632	0.460328	2.62703e-26	GLAB_AKKM8	Alpha-1,3-galactosidase B (EC 3.2.1.n1) (EC 3.2.1.n2) (Exo-alpha-galactosidase B) (EC 3.2.1.22)
	AMUC_RS02645	Amuc_0481	486.59	151.589	0.311532	3.74625e-34	B2UNU9_AKKM8	Uncharacterized protein
	AMUC_RS02650	Amuc_0482	244.478	80.82	0.330582	8.13631e-18	B2UNV0_AKKM8	Hydrolase of the alpha/beta superfamily
	AMUC_RS02655	Amuc_0483	103.003	226.828	2.20216	3.16935e-10	B2UNV1_AKKM8	Uncharacterized protein
	AMUC_RS02660	Amuc_0484	261.462	290.54	1.11121	0.334675	B2UNV2_AKKM8	50S ribosomal protein L21
	AMUC_RS02665	Amuc_0485	708.405	434.331	0.613112	5.65851e-06	RL27_AKKM8	50S ribosomal protein L27
	AMUC_RS02670	Amuc_0486	2003.89	588.564	0.293711	3.85399e-67	B2UNV4_AKKM8	Ferric uptake regulator, Fur family
	AMUC_RS02675	Amuc_0487	7847.09	861.933	0.109841	3.5644e-178	A0A1Y3SWM2_9BACT	ABC transporter ATP-binding protein
	AMUC_RS02680	Amuc_0488	1855.14	815.438	0.439555	4.47495e-37	B2UNV6_AKKM8	FeS assembly protein SufB
	AMUC_RS02685	Amuc_0489	220.773	306.674	1.38909	0.00253067	B2UNV7_AKKM8	SufBD protein
	AMUC_RS02690	Amuc_0490	281.713	273.454	0.97068	0.857281
	AMUC_RS02695		13.2727	0.572866	0.0431612	8.36823e-05	A0A1Y3SUD4_9BACT	Uncharacterized protein
	AMUC_RS02700	Amuc_0491	216.99	40.4016	0.186191	1.11969e-28	B2UNV9_AKKM8	Sulfatase
	AMUC_RS02705	Amuc_0492	87.6255	211.298	2.41138	4.12564e-11	BIOB_AKKM8	Biotin synthase (EC 2.8.1.6)
	AMUC_RS02710	Amuc_0493	55.5635	114.231	2.05586	1.59337e-05	B2UNW1_AKKM8	Adenosylmethionine-8-amino-7-oxononanoate aminotransferase (EC 2.6.1.62) (7,8-diamino-pelargonic acid aminotransferase) (DAPA AT) (DAPA aminotransferase) (7,8-diaminononanoate synthase) (DANS) (Diaminopelargonic acid synthase)
	AMUC_RS02715	Amuc_0494	37.7905	105.97	2.80416	7.28954e-08	B2UNW2_AKKM8	Uncharacterized protein
	AMUC_RS02720	Amuc_0495	5860.18	5131.61	0.875675	0.026231	A0A1Y3SYV1_9BACT	Uncharacterized protein
	AMUC_RS02725	Amuc_0496	319.203	171.282	0.536592	4.72031e-09	B2UNW4_AKKM8	Uncharacterized protein
	AMUC_RS02730	Amuc_0497	7.09112	9.41832	1.32818	0.574373	B2UNW5_AKKM8	Uncharacterized protein
	AMUC_RS02735	Amuc_0498	9.31049	13.0924	1.4062	0.497977	B2UNW6_AKKM8	Uncharacterized protein
	AMUC_RS02740	Amuc_0499	37.1738	79.4876	2.13827	0.000177614	B2UNW7_AKKM8	Glycosyl transferase family 2
	AMUC_RS02745	Amuc_0500	25.3212	70.2488	2.77431	1.53123e-05	B2UNW8_AKKM8	GCN5-related N-acetyltransferase
	AMUC_RS02750	Amuc_0501	227.118	389.741	1.71603	8.02742e-08	B2UNW9_AKKM8	TDP-4-keto-6-deoxy-D-glucose transaminase
	AMUC_RS02755	Amuc_0502	96.0299	47.0039	0.489472	3.81288e-05	B2UNX0_AKKM8	Putative transmembrane protein
	AMUC_RS02765	Amuc_0504	141.933	565.932	3.98733	1.06055e-41	B2UNX2_AKKM8	Uncharacterized protein
	AMUC_RS02770	Amuc_0505	69.5439	725.883	10.4378	7.69541e-94	B2UNX3_AKKM8	ATP synthase epsilon chain (ATP synthase F1 sector epsilon subunit) (F-ATPase epsilon subunit)
	AMUC_RS02775	Amuc_0506	156.297	1336.49	8.551	1.92827e-108	A0A1Y3SZK1_9BACT	ATP synthase subunit beta (EC 3.6.3.14) (ATP synthase F1 sector subunit beta) (F-ATPase subunit beta)
	AMUC_RS02780	Amuc_0507	127.519	1616.77	12.6786	6.69962e-157	ATPG_AKKM8	ATP synthase gamma chain (ATP synthase F1 sector gamma subunit) (F-ATPase gamma subunit)
	AMUC_RS02785	Amuc_0508	502.86	3802.29	7.56134	2.84478e-188	B2UNX6_AKKM8	ATP synthase subunit alpha (EC 3.6.3.14) (ATP synthase F1 sector subunit alpha) (F-ATPase subunit alpha)
	AMUC_RS02790	Amuc_0509	157.421	856.127	5.43846	1.0562e-72	B2UNX7_AKKM8	F0F1-type ATP synthase delta subunit-like protein
	AMUC_RS02795	Amuc_0510	321.883	3282.02	10.1963	6.96849e-219	ATPF_AKKM8	ATP synthase subunit b (ATP synthase F(0) sector subunit b) (ATPase subunit I) (F-type ATPase subunit b) (F-ATPase subunit b)
	AMUC_RS02800	Amuc_0511	85.2426	148.463	1.74165	0.00222922	A0A1Y3SUZ4_9BACT	ATPase
	AMUC_RS02805		4383.77	1476.4	0.336787	1.92911e-73
	AMUC_RS02810	Amuc_0513	3729.68	887.047	0.237834	6.94629e-120	B2UNY1_AKKM8	Uncharacterized protein
	AMUC_RS02815	Amuc_0514	619.785	501.187	0.808646	0.0467395	B2UNY2_AKKM8	Peptidoglycan glycosyltransferase (EC 2.4.1.129)
	AMUC_RS02830		3.4951	3.31421	0.948246	0.962931	A0A1Y3SYN7_9BACT	Uncharacterized protein
	AMUC_RS02835	Amuc_0517	36.462	41.7226	1.14427	0.607856
	AMUC_RS02840	Amuc_0518	8.22251	13.3173	1.61962	0.269122	B2UNY6_AKKM8	Uncharacterized protein
	AMUC_RS02845	Amuc_0519	69.6789	99.5109	1.42814	0.0322263
	AMUC_RS02850	Amuc_0520	598.074	255.744	0.427613	2.58415e-22
	AMUC_RS02855	Amuc_0521	2202.39	491.988	0.223388	1.66222e-85
	AMUC_RS02860	Amuc_0522	1550.12	392.844	0.253428	2.41507e-68	B2UNZ0_AKKM8	UBA/THIF-type NAD/FAD binding protein
	AMUC_RS02865	Amuc_0523	1715.48	1382.7	0.806014	0.0186612	B2UNZ1_AKKM8	KpsF/GutQ family protein (EC 5.3.1.13)
	AMUC_RS02870	Amuc_0524	233.401	1002.5	4.29516	3.00722e-66	A0A1Y3SUB0_9BACT	Uncharacterized protein
	AMUC_RS02875	Amuc_0525	395.105	2359.76	5.97249	9.41399e-131	B2UNZ3_AKKM8	Cycloartenol synthase-like protein
	AMUC_RS02880	Amuc_0526	675.429	43.3825	0.0642295	7.23499e-129	B2UNZ4_AKKM8	DoxX family protein
	AMUC_RS02885	Amuc_0527	701.402	379.12	0.540516	3.74605e-10
	AMUC_RS02890	Amuc_0528	142.001	310.722	2.18817	2.87532e-10	B2UNZ6_AKKM8	Gamma-glutamyl phosphate reductase (GPR) (EC 1.2.1.41) (Glutamate-5-semialdehyde dehydrogenase) (Glutamyl-gamma-semialdehyde dehydrogenase) (GSA dehydrogenase)
	AMUC_RS02895	Amuc_0529	240.16	202.661	0.843859	0.149177	B2UNZ7_AKKM8	Glutamate 5-kinase (EC 2.7.2.11) (Gamma-glutamyl kinase) (GK)
	AMUC_RS02905	Amuc_0530	1226.03	1558.23	1.27096	0.00978127
	AMUC_RS02910	Amuc_0531	771.508	709.841	0.920069	0.315317
	AMUC_RS02915	Amuc_0532	238.1	977.176	4.10406	6.83353e-59	PUR7_AKKM8	Phosphoribosylaminoimidazole-succinocarboxamide synthase (EC 6.3.2.6) (SAICAR synthetase)
	AMUC_RS02920	Amuc_0533	54.3078	459.613	8.46312	3.3346e-60	B2UP01_AKKM8	Uncharacterized protein
	AMUC_RS02925	Amuc_0534	136.893	923.41	6.74551	1.89724e-88	B2UP02_AKKM8	Phosphoribosylformylglycinamidine synthase subunit PurL (FGAM synthase) (EC 6.3.5.3) (Formylglycinamide ribonucleotide amidotransferase subunit II) (FGAR amidotransferase II) (FGAR-AT II) (Glutamine amidotransferase PurL) (Phosphoribosylformylglycinamidine synthase subunit II)
	AMUC_RS02930	Amuc_0535	59.0118	309.163	5.23901	9.21153e-30	B2UP03_AKKM8	Phosphoribosylformylglycinamidine synthase (EC 6.3.5.3)
	AMUC_RS02935	Amuc_0536	30.6901	183.863	5.99097	7.19767e-25	B2UP04_AKKM8	Uncharacterized protein
	AMUC_RS02940	Amuc_0537	1229.45	564.973	0.459532	8.22025e-26	B2UP05_AKKM8	Peptidase M42 family protein
	AMUC_RS02945	Amuc_0538	173.602	117.623	0.677544	0.00390929	B2UP06_AKKM8	Uncharacterized protein
	AMUC_RS02950	Amuc_0539	4255.9	635.253	0.149264	8.92997e-156
	AMUC_RS02955	Amuc_0540	445.647	827.967	1.8579	0.0129687	B2UP08_AKKM8	Cell shape determining protein, MreB/Mrl family
	AMUC_RS02960	Amuc_0541	663.554	3378.82	5.09201	1.24335e-130
	AMUC_RS02965	Amuc_0542	48.9742	271.925	5.55241	3.34449e-32	B2UP10_AKKM8	Uncharacterized protein
	AMUC_RS02970	Amuc_0543	350.245	1016.25	2.90155	6.67438e-36	B2UP11_AKKM8	Uncharacterized protein
	AMUC_RS02975	Amuc_0544	1499.55	4347.18	2.89899	2.35226e-67	B2UP12_AKKM8	Tetratricopeptide TPR_2 repeat protein
	AMUC_RS02980		20.1032	7.56152	0.376135	0.0170569	A0A1Y3SU94_9BACT	Uncharacterized protein
	AMUC_RS02985	Amuc_0546	1773.82	1905.41	1.07419	0.317055	B2UP14_AKKM8	Biopolymer transport protein ExbD/TolR
	AMUC_RS02990	Amuc_0547	527.141	1116.41	2.11787	2.2752e-22	B2UP15_AKKM8	Uncharacterized protein
	AMUC_RS02995	Amuc_0548	1159.2	1234.54	1.06499	0.550868	B2UP16_AKKM8	MotA/TolQ/ExbB proton channel
	AMUC_RS03000	Amuc_0549	253.108	110.469	0.436449	2.09201e-13	B2UP17_AKKM8	Endonuclease III (EC 4.2.99.18) (DNA-(apurinic or apyrimidinic site) lyase)
	AMUC_RS03010		3.23046	0.494381	0.153037	0.0964584	A0A1Y3SU78_9BACT	Uncharacterized protein
	AMUC_RS03015		1.67538	0.996117	0.594561	0.632036
	AMUC_RS03020	Amuc_0551	280.907	642.018	2.28552	1.68882e-19	B2UP19_AKKM8	Phage SPO1 DNA polymerase-related protein
	AMUC_RS03025	Amuc_0552	91.0919	242.499	2.66213	1.48268e-14	B2UP20_AKKM8	Indole-3-glycerol-phosphate synthase (EC 4.1.1.48)
	AMUC_RS03030	Amuc_0553	70.5069	69.0801	0.979764	0.857281
	AMUC_RS03035	Amuc_0554	49.3786	89.2287	1.80703	0.0113358
	AMUC_RS03040	Amuc_0555	245.764	336.026	1.36727	0.00116152	A0A1Y3SU85_9BACT	Uncharacterized protein
	AMUC_RS03045	Amuc_0556	244.478	238.832	0.976905	0.873302	B2UP24_AKKM8	Regulatory protein, FmdB family
	AMUC_RS03050	Amuc_0557	133.991	255.892	1.90976	3.53708e-07	RS14_AKKM8	30S ribosomal protein S14
	AMUC_RS03055	Amuc_0558	6.88927	1.2582	0.182632	0.033644	A0A1Y3T0Y6_9BACT	Uncharacterized protein
	AMUC_RS03060		2.64772	2.49802	0.943461	0.991961	A0A1Y3SYJ2_9BACT	Uncharacterized protein
	AMUC_RS03065	Amuc_0559	369.042	1244.18	3.37137	1.49261e-49	B2UP27_AKKM8	Argininosuccinate synthase (EC 6.3.4.5) (Citrulline--aspartate ligase)
	AMUC_RS03070		30.791	16.0813	0.522271	0.0244945	A0A1Y3SU64_9BACT	Uncharacterized protein
	AMUC_RS03080	Amuc_0562	310.046	515.856	1.66381	2.80176e-08	B2UP29_AKKM8	Triosephosphate isomerase (EC 5.3.1.1)
	AMUC_RS03085	Amuc_0563	898.182	560.455	0.623989	2.4731e-07	B2UPC3_AKKM8	Uncharacterized protein
	AMUC_RS03090	Amuc_0564	209.532	92.5896	0.441888	2.613e-09	B2UPC4_AKKM8	Uncharacterized protein
	AMUC_RS03105	Amuc_0567	38.8779	49.7033	1.27845	0.25805	B2UPC7_AKKM8	Uncharacterized protein
	AMUC_RS03115	Amuc_0568	576.81	217.264	0.376666	1.55698e-24	B2UPC8_AKKM8	Thioesterase superfamily protein
	AMUC_RS03120		74.9685	52.8716	0.705251	0.0563128	B2UPC9_AKKM8	Competence protein F, putative
	AMUC_RS03125	Amuc_0570	90.9991	193.598	2.12747	4.45898e-08	B2UPD0_AKKM8	Uncharacterized protein
	AMUC_RS03130	Amuc_0571	89.7339	237.289	2.64436	1.31563e-14	B2UPD1_AKKM8	MazG family protein
	AMUC_RS03135	Amuc_0572	204.496	67.1329	0.328284	2.31242e-15	B2UPD2_AKKM8	Uncharacterized protein
	AMUC_RS03140	Amuc_0573	77.1116	200.529	2.6005	6.32702e-12
	AMUC_RS03150	Amuc_0574	3898.89	1425.16	0.36553	1.50883e-57
	AMUC_RS03155	Amuc_0575	715.747	249.361	0.348393	5.85748e-26	B2UPD5_AKKM8	Tetraacyldisaccharide 4'-kinase (EC 2.7.1.130) (Lipid A 4'-kinase)
	AMUC_RS03160	Amuc_0576	1206.59	5623.13	4.66036	3.96983e-135	A0A1Y3T477_9BACT	Peptidase M16
	AMUC_RS03165	Amuc_0577	76.3611	111.31	1.45768	0.0237208	B2UPD7_AKKM8	Uncharacterized protein
	AMUC_RS03170	Amuc_0578	86.2289	560.962	6.50549	5.08935e-60	B2UPD8_AKKM8	Band 7 protein
	AMUC_RS03175		44.2555	23.5227	0.531521	0.0185257	A0A1Y3STF0_9BACT	Uncharacterized protein
	AMUC_RS03180	Amuc_0581	266.603	559.465	2.0985	6.57626e-13	B2UPE1_AKKM8	Meso-diaminopimelate D-dehydrogenase (DAPDH) (Meso-DAP dehydrogenase) (EC 1.4.1.16)
	AMUC_RS03185	Amuc_0582	319.495	89.3259	0.279584	2.21489e-30
	AMUC_RS03190	Amuc_0583	46.2971	36.6751	0.792167	0.292254	B2UPE3_AKKM8	Uncharacterized protein
	AMUC_RS03195	Amuc_0584	309.744	146.587	0.473251	4.67536e-12
	AMUC_RS03205	Amuc_0585	965.903	789.353	0.817217	0.0106174	B2UPE5_AKKM8	Pyridoxal-5'-phosphate-dependent protein beta subunit
	AMUC_RS03210	Amuc_0586	61.7644	77.6414	1.25706	0.211022	Y586_AKKM8	Maf-like protein Amuc_0586
	AMUC_RS03215	Amuc_0587	277.846	591.005	2.12709	1.18056e-14	HFLX_AKKM8	GTPase HflX (GTP-binding protein HflX)
	AMUC_RS03220	Amuc_0589	635.851	393.903	0.619489	3.50374e-09	B2UPE9_AKKM8	Serine/threonine protein kinase
	AMUC_RS03225	Amuc_0590	1157.46	840.528	0.726181	1.13902e-05	B2UPF0_AKKM8	Uncharacterized protein
	AMUC_RS03230	Amuc_0591	55.1404	70.6914	1.28203	0.177967	B2UPF1_AKKM8	Abortive infection protein
	AMUC_RS03235	Amuc_0592	47.3604	166.343	3.51227	9.9857e-15	B2UPF2_AKKM8	Thiamine-monophosphate kinase (TMP kinase) (Thiamine-phosphate kinase) (EC 2.7.4.16)
	AMUC_RS03240	Amuc_0593	2622.28	672.733	0.256545	1.2756e-86	B2UPF3_AKKM8	Phospholipid/glycerol acyltransferase
	AMUC_RS03245	Amuc_0594	377.301	150.732	0.399499	9.91961e-11	B2UPF4_AKKM8	Cytidylate kinase (CK) (EC 2.7.4.25) (Cytidine monophosphate kinase) (CMP kinase)
	AMUC_RS03250	Amuc_0595	88.4448	113.258	1.28054	0.127716	B2UPF5_AKKM8	Phospholipid/glycerol acyltransferase
	AMUC_RS03255	Amuc_0596	79.8937	139.69	1.74844	0.00116525	B2UPF6_AKKM8	DNA replication and repair protein RecF
	AMUC_RS03260	Amuc_0597	286.848	110.34	0.384662	1.01806e-16
	AMUC_RS03265	Amuc_0598	900.097	598.078	0.66446	3.0957e-07	A0A1Y3SSP9_9BACT	Ribonuclease 3 (EC 3.1.26.3) (Ribonuclease III) (RNase III)
	AMUC_RS03270	Amuc_0599	258.004	109.928	0.426069	6.82044e-14	B2UPF9_AKKM8	Uncharacterized protein
	AMUC_RS03275	Amuc_0600	39.2153	45.1911	1.15238	0.554859
	AMUC_RS03280	Amuc_0601	47.1632	18.2948	0.387903	0.000308859	B2UPG1_AKKM8	Uncharacterized protein
	AMUC_RS03285	Amuc_0602	105.751	39.8048	0.3764	2.45015e-08	B2UPG2_AKKM8	Uncharacterized protein
	AMUC_RS03290	Amuc_0603	18.6697	23.9637	1.28356	0.386394	B2UPG3_AKKM8	Uncharacterized protein
	AMUC_RS03295	Amuc_0604	29.699	29.0465	0.978029	0.974885	B2UPG4_AKKM8	Uncharacterized protein
	AMUC_RS03300	Amuc_0605	123.981	59.4619	0.479604	3.33602e-06
	AMUC_RS03305	Amuc_0606	2603.05	297.118	0.114142	1.37505e-154
	AMUC_RS03310	Amuc_0607	335.279	71.7118	0.213887	3.86099e-37	B2UPG7_AKKM8	Endonuclease/exonuclease/phosphatase
	AMUC_RS03315	Amuc_0608	71.6282	83.4857	1.16554	0.36545	B2UPG8_AKKM8	Ribosomal RNA small subunit methyltransferase I (EC 2.1.1.198) (16S rRNA 2'-O-ribose C1402 methyltransferase) (rRNA (cytidine-2'-O-)-methyltransferase RsmI)
	AMUC_RS03320	Amuc_0609	72.4182	61.1587	0.844521	0.363086	B2UPG9_AKKM8	Uncharacterized protein
	AMUC_RS03325	Amuc_0610	600	604.796	1.00799	0.986583	B2UPH0_AKKM8	Tetratricopeptide TPR_2 repeat protein
	AMUC_RS03330	Amuc_0611	817.225	581.4	0.711433	5.67144e-06	B2UPH1_AKKM8	Phosphoribosyl-AMP cyclohydrolase (PRA-CH) (EC 3.5.4.19)
	AMUC_RS03340	Amuc_0613	46.0412	80.3715	1.74564	0.00496304	B2UPH3_AKKM8	Uracil-DNA glycosylase superfamily
	AMUC_RS03345	Amuc_0614	295.44	346.085	1.17142	0.59801
	AMUC_RS03350	Amuc_0615	632.579	1045.57	1.65286	4.1094e-12	B2UPH5_AKKM8	Carbamoyl-phosphate synthase large chain (EC 6.3.5.5) (Carbamoyl-phosphate synthetase ammonia chain)
	AMUC_RS03355	Amuc_0616	1701.51	245.565	0.144322	1.43117e-93
	AMUC_RS03360	Amuc_0617	26.0014	11.1939	0.43051	0.0138821	B2UPH7_AKKM8	Uncharacterized protein
	AMUC_RS03365	Amuc_0618	241.78	98.8862	0.408993	2.10148e-14	B2UPH8_AKKM8	Methyltransferase type 11
	AMUC_RS03370	Amuc_0620	524.675	481.246	0.917227	0.33605	B2UPI0_AKKM8	Glutamine-dependent NAD(+) synthetase (EC 6.3.5.1) (NAD(+) synthase [glutamine-hydrolyzing])
	AMUC_RS03375	Amuc_0621	65.0383	38.7684	0.596085	0.00887846	B2UPI1_AKKM8	Small multidrug resistance protein
	AMUC_RS03380	Amuc_0622	31.8067	37.1198	1.16704	0.466242	B2UPI2_AKKM8	Uncharacterized protein
	AMUC_RS03385	Amuc_0623	51.8238	91.8992	1.7733	0.0010557	B2UPI3_AKKM8	Glycosyl hydrolase BNR repeat-containing protein
	AMUC_RS03390	Amuc_0624	104.512	37.247	0.356389	4.32208e-09	B2UPI4_AKKM8	Regulatory protein GntR HTH
	AMUC_RS03395	Amuc_0625	1877.4	1833.08	0.976396	0.764714
	AMUC_RS03400	Amuc_0626	5.87818	4.18683	0.712266	0.598049	B2UPI6_AKKM8	Uncharacterized protein
	AMUC_RS03405	Amuc_0627	222.445	190.748	0.857507	0.196469	B2UPI7_AKKM8	Uncharacterized protein
	AMUC_RS03410		33.2502	93.8173	2.82155	9.06443e-06
	AMUC_RS03415		8.94959	49.1369	5.4904	1.13536e-07
	AMUC_RS03425	Amuc_0629	102.453	202.06	1.97223	9.24743e-07	RUVB_AKKM8	Holliday junction ATP-dependent DNA helicase RuvB (EC 3.6.4.12)
	AMUC_RS03430	Amuc_0630	579.891	698.176	1.20398	0.0790113	B2UPJ0_AKKM8	3-oxoacyl-[acyl-carrier-protein] synthase 3 (EC 2.3.1.180) (3-oxoacyl-[acyl-carrier-protein] synthase III) (Beta-ketoacyl-ACP synthase III) (KAS III)
	AMUC_RS03435	Amuc_0631	1123.96	2159.32	1.92117	2.66934e-24	B2UPJ1_AKKM8	FAD-binding domain protein
	AMUC_RS03440		10.2869	12.718	1.23633	0.732804
	AMUC_RS03460	Amuc_0634	31.5403	8.48245	0.26894	0.00010971	B2UPJ4_AKKM8	Glycosyl transferase family 8
	AMUC_RS03465	Amuc_0635	125.18	31.4467	0.251212	8.40673e-17	B2UPJ5_AKKM8	Uncharacterized protein
	AMUC_RS03475	Amuc_0637	172.194	158.522	0.920601	0.474086	A0A1Y3SUY9_9BACT	Uncharacterized protein
	AMUC_RS03480	Amuc_0638	32.6642	53.7512	1.64557	0.0309868	B2UPJ8_AKKM8	Glycosyl transferase group 1
	AMUC_RS03485	Amuc_0639	23.9992	31.2807	1.30341	0.382669
	AMUC_RS03490	Amuc_0640	11.4189	24.9043	2.18097	0.0211955	B2UPK0_AKKM8	Uncharacterized protein
	AMUC_RS03495	Amuc_0641	5.51667	10.0215	1.81659	0.278241	B2UPK1_AKKM8	Uncharacterized protein
	AMUC_RS03500		84.8569	139.018	1.63826	0.000649967
	AMUC_RS03505	Amuc_0643	119.116	30.7386	0.258057	1.96492e-15	A0A1Y3SZE2_9BACT	Uncharacterized protein
	AMUC_RS03510	Amuc_0644	148.644	305.505	2.05528	4.18582e-11	MNMA_AKKM8	tRNA-specific 2-thiouridylase MnmA (EC 2.8.1.13)
	AMUC_RS03515	Amuc_0645	34.3436	93.611	2.72572	4.5149e-07	MNME_AKKM8	tRNA modification GTPase MnmE (EC 3.6.-.-)
	AMUC_RS03520	Amuc_0646	96.2476	106.729	1.1089	0.458667	B2UPK6_AKKM8	Uncharacterized protein
	AMUC_RS03525	Amuc_0647	221.443	119.75	0.540773	1.24599e-07
	AMUC_RS03530	Amuc_0648	288.826	410.942	1.4228	0.000118855	B2UPK8_AKKM8	Beta-lactamase domain protein
	AMUC_RS03535	Amuc_0649	1747.39	2266.47	1.29706	8.83137e-05	B2UPK9_AKKM8	Transcriptional regulator MraZ
	AMUC_RS03540		117.912	359.363	3.04772	1.46261e-12
	AMUC_RS03545	Amuc_0651	38.9695	196.11	5.0324	9.1374e-22	B2UPL1_AKKM8	Uncharacterized protein
	AMUC_RS03550	Amuc_0652	211.674	818.31	3.8659	1.5945e-50	B2UPL2_AKKM8	Peptidoglycan glycosyltransferase (EC 2.4.1.129)
	AMUC_RS03555	Amuc_0653	68.7407	468.776	6.81948	1.08903e-47	B2UPL3_AKKM8	UDP-N-acetylmuramoyl-L-alanyl-D-glutamate--2,6-diaminopimelate ligase (EC 6.3.2.13) (Meso-A2pm-adding enzyme) (Meso-diaminopimelate-adding enzyme) (UDP-MurNAc-L-Ala-D-Glu:meso-diaminopimelate ligase) (UDP-MurNAc-tripeptide synthetase) (UDP-N-acetylmuramyl-tripeptide synthetase)
	AMUC_RS03560	Amuc_0654	44.1399	308.725	6.99422	1.96049e-37
	AMUC_RS03565	Amuc_0655	25.5524	176.464	6.90595	7.47969e-22	B2UPL5_AKKM8	Phospho-N-acetylmuramoyl-pentapeptide-transferase (EC 2.7.8.13) (UDP-MurNAc-pentapeptide phosphotransferase)
	AMUC_RS03570	Amuc_0656	98.5006	420.806	4.27212	3.03067e-32	B2UPV8_AKKM8	UDP-N-acetylmuramoylalanine--D-glutamate ligase (EC 6.3.2.9) (D-glutamic acid-adding enzyme) (UDP-N-acetylmuramoyl-L-alanyl-D-glutamate synthetase)
	AMUC_RS03575	Amuc_0657	12.6659	223.119	17.6157	9.19288e-35	B2UPV9_AKKM8	Peptidoglycan-binding LysM
	AMUC_RS03580	Amuc_0658	140.893	289.336	2.05359	3.11374e-10	B2UPW0_AKKM8	Cell cycle protein
	AMUC_RS03585	Amuc_0659	34.1411	207.773	6.08571	1.14265e-25	B2UPW1_AKKM8	UDP-N-acetylglucosamine--N-acetylmuramyl-(pentapeptide) pyrophosphoryl-undecaprenol N-acetylglucosamine transferase (EC 2.4.1.227) (Undecaprenyl-PP-MurNAc-pentapeptide-UDPGlcNAc GlcNAc transferase)
	AMUC_RS03590	Amuc_0660	98.2293	420.175	4.27749	2.28003e-32	B2UPW2_AKKM8	Multifunctional fusion protein [Includes: UDP-N-acetylenolpyruvoylglucosamine reductase (EC 1.3.1.98) (UDP-N-acetylmuramate dehydrogenase); UDP-N-acetylmuramate--L-alanine ligase (EC 6.3.2.8) (UDP-N-acetylmuramoyl-L-alanine synthetase)]
	AMUC_RS03595	Amuc_0661	9.45483	137.53	14.546	1.54402e-23	B2UPW3_AKKM8	D-alanine--D-alanine ligase (EC 6.3.2.4) (D-Ala-D-Ala ligase) (D-alanylalanine synthetase)
	AMUC_RS03600	Amuc_0662	449.121	160.947	0.35836	2.1393e-24
	AMUC_RS03605	Amuc_0663	587.045	737.72	1.25667	0.00840848	B2UPW5_AKKM8	Protein RecA (Recombinase A)
	AMUC_RS03610	Amuc_0664	1074.77	371.166	0.345343	6.65642e-47
	AMUC_RS03615	Amuc_0665	153.971	148.77	0.966222	0.820122	B2UPW7_AKKM8	Octanoyltransferase (EC 2.3.1.181)
	AMUC_RS03620	Amuc_0666	1110.42	1396.54	1.25767	0.0329258	LEUC_AKKM8	3-isopropylmalate dehydratase large subunit (EC 4.2.1.33) (Alpha-IPM isomerase) (IPMI) (Isopropylmalate isomerase)
	AMUC_RS03625	Amuc_0667	214.136	580.373	2.71031	4.10407e-28	B2UPW9_AKKM8	3-isopropylmalate dehydratase (EC 4.2.1.33)
	AMUC_RS03630	Amuc_0668	210.621	689.522	3.27375	6.58014e-39	B2UPX0_AKKM8	Uncharacterized protein
	AMUC_RS03635	Amuc_0669	252.606	1839.76	7.28312	4.21913e-138	B2UPX1_AKKM8	2-alkenal reductase (EC 1.3.1.74)
	AMUC_RS03640	Amuc_0670	96.1174	739.448	7.69318	2.40811e-83	B2UPX2_AKKM8	Trypsin-like protein serine protease typically periplasmic contain C-terminal PDZ domain-like protein
	AMUC_RS03645	Amuc_0671	59.8826	279.723	4.6712	2.17346e-30	B2UPX3_AKKM8	3-dehydroquinate synthase (EC 4.2.3.4)
	AMUC_RS03650		39.0222	18.1406	0.464878	0.00659362	A0A1Y3ST60_9BACT	Uncharacterized protein
	AMUC_RS03655	Amuc_0672	115.73	125.127	1.08119	0.579646	B2UPX4_AKKM8	ABC transporter related
	AMUC_RS03660		9.19485	4.67018	0.507912	0.22737	A0A1Y3SSH2_9BACT	Uncharacterized protein
	AMUC_RS03665	Amuc_0673	127.129	305.659	2.40432	1.04003e-11	B2UPX5_AKKM8	Elongation factor Ts (EF-Ts)
	AMUC_RS03670	Amuc_0674	127.327	1560.37	12.2549	2.42406e-129	B2UPX6_AKKM8	30S ribosomal protein S2
	AMUC_RS03675	Amuc_0675	110.936	60.7256	0.547391	0.00014821	A0A1Y3SWU8_9BACT	Uncharacterized protein
	AMUC_RS03680	Amuc_0676	1027.92	730.229	0.710392	5.1829e-06	B2UPX8_AKKM8	2-dehydro-3-deoxyphosphooctonate aldolase (EC 2.5.1.55)
	AMUC_RS03685	Amuc_0677	131.257	273.056	2.08032	2.97727e-10	B2UPX9_AKKM8	Uncharacterized protein
	AMUC_RS03690	Amuc_0678	358.696	964.872	2.68994	5.40327e-29	B2UPY0_AKKM8	Uncharacterized protein
	AMUC_RS03695	Amuc_0679	219.281	250.384	1.14184	0.242499
	AMUC_RS03700	Amuc_0680	88.1789	239.291	2.7137	8.4808e-14	B2UPY2_AKKM8	Uncharacterized protein
	AMUC_RS03705	Amuc_0681	307.069	369.648	1.20379	0.0578964	B2UPY3_AKKM8	UDP-N-acetylmuramate
	AMUC_RS03715	Amuc_0683	67.0358	248.831	3.7119	1.73947e-21	B2UPY5_AKKM8	DNA helicase (EC 3.6.4.12)
	AMUC_RS03720	Amuc_0684	462.464	114.346	0.247254	4.6269e-25	B2UPY6_AKKM8	Transcriptional regulator, HxlR family
	AMUC_RS03725	Amuc_0685	144.349	20.2529	0.140305	1.41549e-28	B2UPY7_AKKM8	Conserved protein/domain typically associated with flavoprotein oxygenase DIM6/NTAB family-like protein
	AMUC_RS03730	Amuc_0686	797.032	144.403	0.181176	3.82034e-64	B2UPY8_AKKM8	ABC transporter related
	AMUC_RS03735	Amuc_0687	30463.1	3852.64	0.126469	2.37479e-272
	AMUC_RS03740	Amuc_0688	254.99	235.931	0.925257	0.582477
	AMUC_RS03745	Amuc_0689	1777.58	534.22	0.300532	3.38204e-45
	AMUC_RS03750	Amuc_0690	2082.82	1109.24	0.532564	2.06149e-17	B2UPZ2_AKKM8	Uncharacterized protein
	AMUC_RS03755	Amuc_0691	39159.7	4162.46	0.106294	3.60207e-231	B2UPZ3_AKKM8	Thioredoxin
	AMUC_RS03760		130.105	209.627	1.61121	0.000403795	A0A1Y3SSL2_9BACT	Uncharacterized protein
	AMUC_RS03765	Amuc_0693	108.397	138.62	1.27881	0.103791	B2UPZ5_AKKM8	Uncharacterized protein
	AMUC_RS03770	Amuc_0694	266.044	347.31	1.30546	0.00606137
	AMUC_RS03775	Amuc_0695	98.0674	147.166	1.50066	0.00308592	B2UPZ7_AKKM8	Uncharacterized protein
	AMUC_RS03780	Amuc_0696	44.7661	103.317	2.30792	3.5473e-06	B2UPZ8_AKKM8	Uncharacterized protein
	AMUC_RS03785	Amuc_0697	34.1892	122.966	3.59664	3.38966e-12	B2UPZ9_AKKM8	Beta-glucanase
	AMUC_RS03790	Amuc_0698	29.6208	82.8022	2.7954	4.28544e-07	B2UQ00_AKKM8	Beta-glucanase
	AMUC_RS03795	Amuc_0699	18.4819	42.0829	2.27698	0.00337807	B2UQ01_AKKM8	Uncharacterized protein
	AMUC_RS03800	Amuc_0700	3003.98	680.432	0.22651	5.16066e-74	B2UQ02_AKKM8	Uncharacterized protein
	AMUC_RS03805	Amuc_0701	95.54	51.5871	0.539953	0.000196474	A0A1Y3SSY8_9BACT	Uncharacterized protein
	AMUC_RS03810	Amuc_0702	563.281	450.068	0.799012	0.00776363	B2UQ04_AKKM8	Uncharacterized protein
	AMUC_RS03815		11.6354	6.42644	0.552316	0.175946	A0A1Y3SSK7_9BACT	Uncharacterized protein
	AMUC_RS03820	Amuc_0703	168.508	619.328	3.67537	1.27306e-41	B2UQ05_AKKM8	Alanine--glyoxylate transaminase (EC 2.6.1.44)
	AMUC_RS03825		58.4137	49.5601	0.848434	0.455737	A0A1Y3T2D8_9BACT	Uncharacterized protein
	AMUC_RS03830	Amuc_0704	112.804	447.027	3.96288	8.51283e-35	B2UQ06_AKKM8	Uncharacterized protein
	AMUC_RS03835	Amuc_0705	179.191	1277.96	7.13183	5.0354e-102	B2UQ07_AKKM8	D-isomer specific 2-hydroxyacid dehydrogenase NAD-binding
	AMUC_RS03840	Amuc_0706	910.543	142.483	0.156482	5.04002e-73	B2UQ08_AKKM8	Uncharacterized protein
	AMUC_RS03845	Amuc_0707	219.91	40.9288	0.186116	1.84454e-30	B2UQ09_AKKM8	7-carboxy-7-deazaguanine synthase (CDG synthase) (EC 4.3.99.3) (Queuosine biosynthesis protein QueE)
	AMUC_RS03855	Amuc_0709	3182.64	3938.59	1.23752	0.000192765	Y709_AKKM8	Probable transcriptional regulatory protein Amuc_0709
	AMUC_RS03860	Amuc_0710	883.198	91.0578	0.1031	7.10951e-91	A0A1Y3SSJ6_9BACT	Uncharacterized protein
	AMUC_RS03865	Amuc_0711	193.374	198.773	1.02792	0.881333	B2UQ13_AKKM8	Sodium/hydrogen exchanger
	AMUC_RS03870	Amuc_0712	18.4866	11.7255	0.634272	0.249709	B2UQ14_AKKM8	Uncharacterized protein
	AMUC_RS03875	Amuc_0713	149.765	136.25	0.909754	0.55055	B2UQ15_AKKM8	S-adenosylmethionine:tRNA ribosyltransferase-isomerase (EC 2.4.99.17) (Queuosine biosynthesis protein QueA)
	AMUC_RS03880	Amuc_0714	561.353	404.944	0.721372	0.0193188	B2UQ16_AKKM8	UPF0365 protein Amuc_0714
	AMUC_RS03885	Amuc_0715	132.458	526.901	3.97788	9.77301e-36	A0A1Y3T2C8_9BACT	Uncharacterized protein
	AMUC_RS03890	Amuc_0716	109.054	230.324	2.11202	9.44138e-07	B2UQ18_AKKM8	Thiazole synthase (EC 2.8.1.10)
	AMUC_RS03895	Amuc_0717	1732.76	664.91	0.38373	2.89098e-32
	AMUC_RS03900	Amuc_0718	135.77	315.988	2.32737	1.9e-14
	AMUC_RS03905	Amuc_0719	164.059	333.494	2.03276	2.7011e-11	A0A1Y3SWY4_9BACT	AI-2E family transporter
	AMUC_RS03910	Amuc_0720	82.9569	513.591	6.19106	1.14945e-56	B2UQ22_AKKM8	Diaminopimelate decarboxylase (EC 4.1.1.20)
	AMUC_RS03915	Amuc_0721	755.81	1153.92	1.52674	1.31921e-07	B2UQ23_AKKM8	Fructose-bisphosphate aldolase, class II (EC 4.1.2.13)
	AMUC_RS03920	Amuc_0722	235.212	645.861	2.74586	1.29326e-27	B2UQ24_AKKM8	GTP-binding protein TypA
	AMUC_RS03925	Amuc_0723	1583.97	1483.12	0.936334	0.35237	B2UQ25_AKKM8	Branched-chain-amino-acid aminotransferase (BCAT) (EC 2.6.1.42)
	AMUC_RS03930	Amuc_0724	1268.6	492.325	0.388085	2.02876e-28
	AMUC_RS03935	Amuc_0725	34.2614	11.7327	0.342447	0.000519397
	AMUC_RS03945		6.56651	0.190955	0.0290802	0.00216625	A0A1Y3SZ55_9BACT	Uncharacterized protein
	AMUC_RS03950	Amuc_0728	357.251	476.854	1.33479	0.000933172	OBG_AKKM8	GTPase Obg (EC 3.6.5.-) (GTP-binding protein Obg)
	AMUC_RS03955	Amuc_0729	156.236	504.336	3.22803	3.67056e-31	B2UQ31_AKKM8	Aminoglycoside phosphotransferase
	AMUC_RS03960	Amuc_0730	2145.18	1040.68	0.485125	3.14595e-21	B2UQ32_AKKM8	D-alanine--D-alanine ligase (EC 6.3.2.4)
	AMUC_RS03965	Amuc_0731	22.8331	28.6453	1.25455	0.390648
	AMUC_RS03970	Amuc_0732	77.3004	84.8911	1.0982	0.554764	B2UQ34_AKKM8	Uncharacterized protein
	AMUC_RS03975		47.4244	24.7655	0.522211	0.0170999	A0A1Y3SSH3_9BACT	RHS repeat-associated core domain-containing protein
	AMUC_RS03980	Amuc_0735	3032.68	524.754	0.173033	2.25504e-168	B2UQ36_AKKM8	YD repeat protein
	AMUC_RS03985	Amuc_0736	297.262	449.765	1.51303	1.69319e-05	B2UQ37_AKKM8	Protein tyrosine phosphatase
	AMUC_RS03990	Amuc_0737	2469.02	1185.16	0.48001	1.52647e-12	B2UQ38_AKKM8	Inosine-5'-monophosphate dehydrogenase (EC 1.1.1.205)
	AMUC_RS03995	Amuc_0738	246.718	572.886	2.32202	8.22475e-19	B2UQ39_AKKM8	GMP synthase (glutamine-hydrolyzing) (EC 6.3.5.2)
	AMUC_RS04000	Amuc_0739	63.4445	271.343	4.27686	7.83879e-26	A0A1Y3SWN7_9BACT	Maltose acetyltransferase
	AMUC_RS04005	Amuc_0740	51.4354	216.824	4.21547	4.85296e-18	B2UQ41_AKKM8	Haloacid dehalogenase domain protein hydrolase
	AMUC_RS04010	Amuc_0742	45.3775	54.313	1.19691	0.393319	B2UQ43_AKKM8	Auxin Efflux Carrier
	AMUC_RS04015	Amuc_0743	134.703	148.197	1.10018	0.465336	A0A1Y3SSG2_9BACT	Uncharacterized protein
	AMUC_RS04020	Amuc_0744	1348.27	2460.74	1.8251	6.86414e-21	B2UQ45_AKKM8	Phospho-2-dehydro-3-deoxyheptonate aldolase (EC 2.5.1.54) (3-deoxy-D-arabino-heptulosonate 7-phosphate synthase) (DAHP synthase) (Phospho-2-keto-3-deoxyheptonate aldolase)
	AMUC_RS04035	Amuc_0747	73.4393	190.469	2.59356	2.12864e-11	B2UQ48_AKKM8	Aspartate 1-decarboxylase (EC 4.1.1.11) (Aspartate alpha-decarboxylase) [Cleaved into: Aspartate 1-decarboxylase beta chain; Aspartate 1-decarboxylase alpha chain]
	AMUC_RS04040	Amuc_0748	61.1143	253.343	4.1454	2.92849e-24	B2UQ49_AKKM8	Riboflavin biosynthesis protein (EC 2.7.1.26) (EC 2.7.7.2)
	AMUC_RS04045	Amuc_0749	155.151	343.764	2.21567	1.55084e-12	B2UQ50_AKKM8	tRNA pseudouridine synthase B (EC 5.4.99.25) (tRNA pseudouridine(55) synthase) (Psi55 synthase) (tRNA pseudouridylate synthase) (tRNA-uridine isomerase)
	AMUC_RS04050	Amuc_0750	1420.83	1228.29	0.864491	0.0427116	A0A1Y3SWV3_9BACT	DHH family phosphoesterase
	AMUC_RS04055	Amuc_0751	857.794	100.531	0.117198	1.02385e-118	B2UQ52_AKKM8	Uncharacterized protein
	AMUC_RS04060	Amuc_0752	98.8026	121.319	1.22789	0.179817	B2UQ53_AKKM8	Metallophosphoesterase
	AMUC_RS04065	Amuc_0753	134.956	261.829	1.94011	5.39384e-08
	AMUC_RS04075	Amuc_0755	145.703	193.647	1.32905	0.023476	B2UQ56_AKKM8	Glycosyl transferase family 9
	AMUC_RS04080	Amuc_0756	1522.02	811.121	0.532924	4.13213e-17	B2UQ57_AKKM8	ADP-L-glycero-D-manno-heptose-6-epimerase (EC 5.1.3.20) (ADP-L-glycero-beta-D-manno-heptose-6-epimerase) (ADP-glyceromanno-heptose 6-epimerase) (ADP-hep 6-epimerase) (AGME)
	AMUC_RS04090	Amuc_0758	135.585	154.462	1.13923	0.332353	B2UQ59_AKKM8	Uncharacterized protein
	AMUC_RS04095	Amuc_0759	104.981	54.5282	0.519411	0.000192944
	AMUC_RS04100	Amuc_0760	55.4198	66.2372	1.19519	0.339363	B2UQ61_AKKM8	Uncharacterized protein
	AMUC_RS04105	Amuc_0761	38.3252	65.8303	1.71768	0.00849051	B2UQ62_AKKM8	Acyltransferase 3
	AMUC_RS04110	Amuc_0762	108.496	200.621	1.84911	1.71074e-06	B2UQ63_AKKM8	Uncharacterized protein
	AMUC_RS04115	Amuc_0763	230.289	45.7191	0.198529	1.19897e-32	B2UQ64_AKKM8	Uncharacterized protein
	AMUC_RS04120		656.683	213.943	0.325793	6.34756e-23	A0A1Y3SUK9_9BACT	Uncharacterized protein
	AMUC_RS04125	Amuc_0766	147.772	122.638	0.829911	0.15225	B2UQ66_AKKM8	Citrate transporter
	AMUC_RS04135	Amuc_0767	2255	348.848	0.1547	2.60122e-169	B2UQ67_AKKM8	Uncharacterized protein
	AMUC_RS04140	Amuc_0768	11004.5	1990.13	0.180846	1.73346e-97	B2UQ68_AKKM8	Ferripyochelin binding protein (Fbp)
	AMUC_RS04145	Amuc_0769	177.043	279.307	1.57762	2.88647e-05	B2UQ69_AKKM8	Uncharacterized protein
	AMUC_RS04150	Amuc_0770	30.95	12.2051	0.394347	0.00325449
	AMUC_RS04155		14.3894	15.3807	1.06889	0.75695	A0A1Y3T280_9BACT	Uncharacterized protein
	AMUC_RS04160	Amuc_0771	361.256	421.849	1.16773	0.0949463
	AMUC_RS04170	Amuc_0773	193.544	66.5004	0.343593	9.50424e-15	B2UQ73_AKKM8	Acyltransferase 3
	AMUC_RS04175	Amuc_0774	93.7096	126.005	1.34463	0.058701	B2UQ74_AKKM8	Major facilitator superfamily MFS_1
	AMUC_RS04180	Amuc_0775	75.4215	23.0911	0.30616	8.41591e-09
	AMUC_RS04185		345.433	20.8147	0.0602569	1.69964e-78	A0A1Y3SS90_9BACT	Uncharacterized protein
	AMUC_RS04190	Amuc_0777	162.546	61.9024	0.380829	1.61137e-10
	AMUC_RS04195	Amuc_0778	94.3511	39.9435	0.42335	6.89402e-07	B2UQ77_AKKM8	Uncharacterized protein
	AMUC_RS04200	Amuc_0779	93.2924	72.8283	0.780646	0.19557
	AMUC_RS04210	Amuc_0781	12.1653	19.6873	1.61831	0.152501	B2UQ80_AKKM8	Uncharacterized protein
	AMUC_RS04215	Amuc_0782	46.8545	17.5038	0.373577	6.93379e-05	B2UQ81_AKKM8	ParB domain protein nuclease
	AMUC_RS04220	Amuc_0783	264.888	84.8427	0.320297	1.7815e-19	B2UQ82_AKKM8	Phosphoadenosine phosphosulfate reductase
	AMUC_RS04225	Amuc_0784	43.1622	16.3319	0.378385	0.000218476	B2UQ83_AKKM8	Uncharacterized protein
	AMUC_RS04235	Amuc_0785	308.601	403.808	1.30851	0.0164228	B2UQ84_AKKM8	3-isopropylmalate dehydrogenase (EC 1.1.1.85) (3-IPM-DH) (Beta-IPM dehydrogenase) (IMDH)
	AMUC_RS04240	Amuc_0786	53.3449	96.1379	1.8022	0.00296204	B2UQ85_AKKM8	FAD dependent oxidoreductase
	AMUC_RS04245	Amuc_0787	18861.6	774.972	0.0410873	0
	AMUC_RS04250	Amuc_0788	1829.39	258.344	0.141219	6.21903e-174	B2UQ87_AKKM8	Mg chelatase, subunit ChlI
	AMUC_RS04255	Amuc_0789	6144.34	1443.93	0.235001	2.85038e-66	A0A1Y3SSG5_9BACT	PEP-CTERM sorting domain-containing protein
	AMUC_RS04260	Amuc_0790	271.147	318.414	1.17432	0.146744	A0A1Y3SRZ2_9BACT	O-acetylhomoserine aminocarboxypropyltransferase
	AMUC_RS04265	Amuc_0791	157.141	335.499	2.13502	1.21873e-11	B2UQ90_AKKM8	Radical SAM domain protein
	AMUC_RS04270	Amuc_0792	413.897	602.24	1.45505	8.7831e-06	B2UQ91_AKKM8	Radical SAM domain protein
	AMUC_RS04275	Amuc_0793	1709.23	782.471	0.457791	2.06983e-21	B2UQ92_AKKM8	Uncharacterized protein
	AMUC_RS04280	Amuc_0794	2951.53	998.118	0.33817	3.75591e-52	B2UQ93_AKKM8	Uncharacterized protein
	AMUC_RS04285	Amuc_0795	199.99	227.387	1.13699	0.331842	B2UQ94_AKKM8	Glycerol-3-phosphate dehydrogenase [NAD(P)+] (EC 1.1.1.94) (NAD(P)H-dependent glycerol-3-phosphate dehydrogenase)
	AMUC_RS04290	Amuc_0796	702.15	234.406	0.33384	1.31572e-38	B2UQ95_AKKM8	Glycerol-3-phosphate acyltransferase (Acyl-PO4 G3P acyltransferase) (Acyl-phosphate--glycerol-3-phosphate acyltransferase) (G3P acyltransferase) (GPAT) (EC 2.3.1.n3) (Lysophosphatidic acid synthase) (LPA synthase)
	AMUC_RS04295		31.1325	102.213	3.28315	1.10988e-09	B2UQ96_AKKM8	Protein serine/threonine phosphatase
	AMUC_RS04305	Amuc_0798	212.031	916.512	4.32255	8.16227e-63	B2UQ97_AKKM8	Lysine--tRNA ligase (EC 6.1.1.6) (Lysyl-tRNA synthetase) (LysRS)
	AMUC_RS04310		41.3056	7.31414	0.177074	9.26373e-07	A0A1Y3SU40_9BACT	Uncharacterized protein
	AMUC_RS04315	Amuc_0799	3055.58	3616.07	1.18343	0.00681722	B2UQ98_AKKM8	Pyruvate-flavodoxin oxidoreductase (EC 1.2.7.-)
	AMUC_RS04320	Amuc_0801	77.9876	19.9647	0.255998	2.41883e-11	B2UQ99_AKKM8	Cupin 2 conserved barrel domain protein
	AMUC_RS04325	Amuc_0802	54.6205	6.88278	0.126011	9.75701e-10	B2UQA0_AKKM8	Transcriptional regulator, HxlR family
	AMUC_RS04335	Amuc_0804	285.725	419.22	1.46722	0.00070541	HIS6_AKKM8	Imidazole glycerol phosphate synthase subunit HisF (EC 4.1.3.-) (IGP synthase cyclase subunit) (IGP synthase subunit HisF) (ImGP synthase subunit HisF) (IGPS subunit HisF)
	AMUC_RS04340	Amuc_0805	2.9077	0.190955	0.0656723	0.0613756	B2UQA3_AKKM8	Uncharacterized protein
	AMUC_RS04345	Amuc_0806	254.568	126.821	0.498181	2.37624e-10	B2UQA4_AKKM8	H(+)-transporting two-sector ATPase (EC 3.6.3.14)
	AMUC_RS04350	Amuc_0807	157.646	87.2992	0.553765	6.94206e-05	B2UQA5_AKKM8	TrkA-N domain protein
	AMUC_RS04355	Amuc_0808	279.667	402.69	1.43989	8.14734e-05	A0A1Y3SRR9_9BACT	ATP-dependent RNA helicase HrpA
	AMUC_RS04360	Amuc_0809	707.776	726.721	1.02677	0.766955	B2UQA7_AKKM8	Acetolactate synthase, small subunit
	AMUC_RS04365	Amuc_0810	984.132	717.349	0.728915	5.92161e-05
	AMUC_RS04375	Amuc_0811	1266.29	532.348	0.420401	1.73831e-25	B2UQA9_AKKM8	DNA polymerase III, delta subunit
	AMUC_RS04380	Amuc_0812	375.592	364.943	0.971647	0.86776	B2UQB0_AKKM8	tRNA uridine 5-carboxymethylaminomethyl modification enzyme MnmG (Glucose-inhibited division protein A)
	AMUC_RS04385	Amuc_0813	291.361	86.0114	0.295205	9.69902e-25	A0A1Y3SRQ8_9BACT	Riboflavin biosynthesis protein RibD
	AMUC_RS04395	Amuc_0815	3779.89	879.378	0.232646	7.47329e-90	B2UQB3_AKKM8	Uncharacterized protein
	AMUC_RS04400	Amuc_0816	2395.66	475.509	0.198488	1.36186e-80	B2UQB4_AKKM8	Beta sliding clamp
	AMUC_RS04405	Amuc_0817	851.938	158.674	0.18625	1.02743e-51	B2UQB5_AKKM8	Uncharacterized protein
	AMUC_RS04410	Amuc_0818	139.29	38.9777	0.279832	1.52472e-16	B2UQB6_AKKM8	Adenosylhomocysteinase
	AMUC_RS04415	Amuc_0819	35.7784	39.4472	1.10254	0.737192	B2UQB7_AKKM8	Multi antimicrobial extrusion protein MatE
	AMUC_RS04425	Amuc_0821	293.894	636.058	2.16425	6.6775e-20
	AMUC_RS04430	Amuc_0822	179.783	197.975	1.10119	0.510831
	AMUC_RS04435	Amuc_0823	131.057	412.629	3.14846	1.5547e-25	A0A1Y3SRV1_9BACT	Uncharacterized protein
	AMUC_RS04440	Amuc_0824	2697.97	2144.35	0.794801	0.00031657
	AMUC_RS04445	Amuc_0825	302.805	221.362	0.73104	0.00192693	B2UQC3_AKKM8	Uncharacterized protein
	AMUC_RS04450	Amuc_0826	279.406	274.615	0.982854	0.932633	A0A1Y3SYI0_9BACT	Uncharacterized protein
	AMUC_RS04455	Amuc_0827	1596.18	596.39	0.373637	1.2327e-32
	AMUC_RS04460	Amuc_0828	111.495	79.1923	0.71028	0.0244357	B2UQC6_AKKM8	Two component transcriptional regulator, winged helix family
	AMUC_RS04465	Amuc_0829	303.05	58.0093	0.191418	3.64584e-40	A0A1Y3SRP7_9BACT	Uncharacterized protein
	AMUC_RS04470	Amuc_0830	689.808	141.756	0.205501	1.68435e-60	B2UQC8_AKKM8	Potassium-transporting ATPase potassium-binding subunit (ATP phosphohydrolase [potassium-transporting] A chain) (Potassium-binding and translocating subunit A) (Potassium-translocating ATPase A chain)
	AMUC_RS04475	Amuc_0831	257.062	256.08	0.996179	0.98852	A0A1Y3SSL1_9BACT	Potassium-transporting ATPase ATP-binding subunit (EC 3.6.3.12) (ATP phosphohydrolase [potassium-transporting] B chain) (Potassium-binding and translocating subunit B) (Potassium-translocating ATPase B chain)
	AMUC_RS04480	Amuc_0832	59.1642	50.4934	0.853445	0.449024	B2UQD0_AKKM8	Potassium-transporting ATPase KdpC subunit (ATP phosphohydrolase [potassium-transporting] C chain) (Potassium-binding and translocating subunit C) (Potassium-translocating ATPase C chain)
	AMUC_RS04485	Amuc_0833	1520.54	2123.84	1.39676	2.14331e-05
	AMUC_RS04490	Amuc_0834	7027.04	5358.64	0.762574	0.00153876	B2UQD2_AKKM8	Transcriptional regulator, MarR family with acetyltransferase activity
	AMUC_RS04495		23.0931	2.2093	0.0956694	1.31403e-06	A0A1Y3SRM9_9BACT	Uncharacterized protein
	AMUC_RS04500	Amuc_0836	149767	13139.1	0.0877302	0	B2UQD4_AKKM8	Chaperone protein ClpB
	AMUC_RS04505		0	0	#DIV/0!	NA	A0A1Y3SYH4_9BACT	Uncharacterized protein
	AMUC_RS04535	Amuc_0837	271.825	169.32	0.622901	3.54056e-05	B2UQD5_AKKM8	Uncharacterized protein
	AMUC_RS04540		15.6986	16.9985	1.08281	0.890649	A0A1Y3SWE4_9BACT	Uncharacterized protein
	AMUC_RS04545	Amuc_0838	474.142	618.354	1.30415	0.00681345	NRDR_AKKM8	Transcriptional repressor NrdR
	AMUC_RS04550	Amuc_0839	293.225	218.093	0.743774	0.00301601	B2UQD7_AKKM8	Uncharacterized protein
	AMUC_RS04555	Amuc_0840	45.252	142.064	3.13941	1.59055e-10	B2UQD8_AKKM8	Sulfate transporter
	AMUC_RS04560	Amuc_0841	244.439	736.097	3.01137	3.13088e-37
	AMUC_RS04565	Amuc_0842	93.4075	145.549	1.55822	0.00187018	B2UQE0_AKKM8	Zinc finger SWIM domain protein
	AMUC_RS04570	Amuc_0843	27.0928	12.8606	0.474687	0.019669
	AMUC_RS04575	Amuc_0844	1539.11	360.313	0.234105	8.03402e-98
	AMUC_RS04580	Amuc_0845	60.7633	150.552	2.47769	5.96996e-09	END4_AKKM8	Probable endonuclease 4 (EC 3.1.21.2) (Endodeoxyribonuclease IV) (Endonuclease IV)
	AMUC_RS04585	Amuc_0846	48.0881	54.6173	1.13578	0.511099	B2UQE4_AKKM8	Coagulation factor 5/8 type domain protein
	AMUC_RS04590	Amuc_0847	452.673	288.721	0.637813	3.75165e-07	B2UQE5_AKKM8	Metal dependent phosphohydrolase
	AMUC_RS04595	Amuc_0848	89.9347	59.9653	0.666765	0.0378156
	AMUC_RS04600	Amuc_0849	78.0886	232.612	2.97883	8.00636e-17	MIAB_AKKM8	tRNA-2-methylthio-N(6)-dimethylallyladenosine synthase (EC 2.8.4.3) ((Dimethylallyl)adenosine tRNA methylthiotransferase MiaB) (tRNA-i(6)A37 methylthiotransferase)
	AMUC_RS04605	Amuc_0850	38.632	124.165	3.21404	1.29563e-10	B2UQE8_AKKM8	RNA methyltransferase, TrmA family
	AMUC_RS04610	Amuc_0851	24.0467	73.3039	3.0484	3.90928e-06	B2UQE9_AKKM8	Uncharacterized protein
	AMUC_RS04615		428.115	185.832	0.434071	3.37525e-11
	AMUC_RS04620	Amuc_0853	18.486	18.8965	1.02221	0.975732	B2UQF1_AKKM8	Uncharacterized protein
	AMUC_RS04625	Amuc_0854	16.5653	6.83814	0.412798	0.0338904	B2UQF2_AKKM8	Histone family protein DNA-binding protein
	AMUC_RS04630	Amuc_0855	791.565	305.791	0.386312	2.60912e-29	B2UQF3_AKKM8	Alpha-galactosidase (EC 3.2.1.22)
	AMUC_RS04635	Amuc_0856	81.7474	224.177	2.74231	7.33478e-14	B2UQF4_AKKM8	YidE/YbjL duplication
	AMUC_RS04640	Amuc_0857	61.4757	303.51	4.93708	4.14362e-26	B2UQF5_AKKM8	Response regulator receiver protein
	AMUC_RS04645	Amuc_0858	151.359	544.582	3.59796	1.80079e-36
	AMUC_RS04650		132.783	815.02	6.13798	1.769e-73	B2UQF7_AKKM8	Anion transporter
	AMUC_RS04655	Amuc_0860	222.881	331.789	1.48864	0.000115042
	AMUC_RS04660	Amuc_0861	39.4459	74.3072	1.88378	0.00250584	B2UQF9_AKKM8	Uncharacterized protein
	AMUC_RS04665	Amuc_0862	925.214	2532.91	2.73764	2.90216e-55	B2UQG0_AKKM8	Anaerobic ribonucleoside-triphosphate reductase
	AMUC_RS04675	Amuc_0864	108.755	40.5952	0.373272	3.29295e-09	B2UQG2_AKKM8	Sulfatase
	AMUC_RS04680		220.948	40.4662	0.183148	1.29548e-25	A0A1Y3T325_9BACT	Uncharacterized protein
	AMUC_RS04685	Amuc_0865	1414.76	245.926	0.173829	3.05153e-110	B2UQG3_AKKM8	Rubrerythrin
	AMUC_RS04690	Amuc_0866	635.999	1613.65	2.53719	4.43538e-16	A0A1Y3T0T9_9BACT	Uncharacterized protein
	AMUC_RS04695	Amuc_0867	1079.28	1581.27	1.46511	1.09127e-07	B2UQG5_AKKM8	Peptidase M42 family protein
	AMUC_RS04700	Amuc_0868	169.634	74.5287	0.439351	1.40777e-09	B2UQG6_AKKM8	Beta-N-acetylhexosaminidase (EC 3.2.1.52)
	AMUC_RS04705	Amuc_0869	40.2752	26.4887	0.657692	0.101915
	AMUC_RS04710	Amuc_0870	169.512	120.751	0.712343	0.0069256	B2UQG8_AKKM8	Alkaline phosphatase (EC 3.1.3.1)
	AMUC_RS04715	Amuc_0871	3373.25	588.809	0.174553	5.53428e-111	B2UQG9_AKKM8	Large-conductance mechanosensitive channel
	AMUC_RS04720	Amuc_0872	340.945	672.767	1.97324	2.07292e-07	B2UQH0_AKKM8	Acetylornithine and succinylornithine aminotransferase
	AMUC_RS04725	Amuc_0873	46.753	118.578	2.53626	4.32038e-07	B2UQH1_AKKM8	Amino acid-binding ACT
	AMUC_RS04730	Amuc_0874	1184.81	971.03	0.819565	0.0110316	B2UQH2_AKKM8	Elongation factor P (EF-P)
	AMUC_RS04735	Amuc_0875	231.348	105.551	0.456243	1.00105e-09	B2UQH3_AKKM8	Glycoside hydrolase family 16
	AMUC_RS04740	Amuc_0876	1200.4	1815.78	1.51265	3.36927e-09
	AMUC_RS04745	Amuc_0877	309.409	256.354	0.828531	0.0586214	B2UQH5_AKKM8	DNA repair protein RecN (Recombination protein N)
	AMUC_RS04750	Amuc_0878	86.442	60.1105	0.695385	0.0291792
	AMUC_RS04755	Amuc_0879	71.5133	90.9318	1.27154	0.173855	B2UQH7_AKKM8	Glycosyl transferase, WecB/TagA/CpsF family
	AMUC_RS04760	Amuc_0880	290.369	105.07	0.36185	2.37351e-18	A0A1Y3SWD0_9BACT	Uncharacterized protein
	AMUC_RS04775	Amuc_0883	18135.5	2419.14	0.133392	6.55003e-182
	AMUC_RS04780	Amuc_0884	99.9113	183.783	1.83946	0.000227786	B2UQI2_AKKM8	Uncharacterized protein
	AMUC_RS04785	Amuc_0885	187.536	334.663	1.78453	1.24086e-07	B2UQI3_AKKM8	Dihydrolipoamide acetyltransferase component of pyruvate dehydrogenase complex (EC 2.3.1.-)
	AMUC_RS04790	Amuc_0886	875.864	587.76	0.671063	8.61949e-05	B2UQI4_AKKM8	Transketolase central region
	AMUC_RS04795	Amuc_0887	3959.28	822.933	0.207849	2.15965e-107	B2UQI5_AKKM8	Dehydrogenase E1 component
	AMUC_RS04800		149.175	34.8585	0.233675	1.53775e-17	A0A1Y3SW91_9BACT	Uncharacterized protein
	AMUC_RS04810	Amuc_0889	57.6632	229.098	3.97304	4.12574e-17	B2UQI7_AKKM8	Efflux transporter, RND family, MFP subunit
	AMUC_RS04815	Amuc_0890	77.6167	430.376	5.54489	2.71512e-43	B2UQI8_AKKM8	Transporter, hydrophobe/amphiphile efflux-1 (HAE1) family
	AMUC_RS04820	Amuc_0891	6.48434	11.0626	1.70605	0.348854
	AMUC_RS04825	Amuc_0892	80.6113	63.4821	0.787509	0.220734
	AMUC_RS04830	Amuc_0893	1148.86	110.907	0.096536	2.14699e-137	B2UQJ1_AKKM8	Uncharacterized protein
	AMUC_RS04835		83.4427	4.17947	0.0500879	7.12335e-24
	AMUC_RS04840	Amuc_0894	2023.25	831.204	0.410826	9.96996e-41	B2UQJ2_AKKM8	Peptidase membrane zinc metallopeptidase putative
	AMUC_RS04850	Amuc_0896	791.879	1179.51	1.48951	0.000246944	B2UQJ4_AKKM8	Uroporphyrin-III C-methyltransferase
	AMUC_RS04860	Amuc_0898	402.568	1455.85	3.61641	7.44355e-57	B2UQJ6_AKKM8	DNA topoisomerase III (EC 5.99.1.2)
	AMUC_RS04865	Amuc_0899	175.478	282.021	1.60716	1.22743e-05	B2UQJ7_AKKM8	Uncharacterized protein
	AMUC_RS04870	Amuc_0900	1070.97	470.815	0.439614	4.12181e-20	B2UQJ8_AKKM8	Uncharacterized protein
	AMUC_RS04875		40.8954	72.5054	1.77295	0.00465545	A0A1Y3SYH0_9BACT	Uncharacterized protein
	AMUC_RS04880	Amuc_0903	279.198	417.028	1.49366	1.17582e-05	B2UQK0_AKKM8	N-acetylmuramoyl-L-alanine amidase family 2
	AMUC_RS04885	Amuc_0904	363.717	426.753	1.17331	0.178553	B2UQK1_AKKM8	Aconitate hydratase (Aconitase) (EC 4.2.1.3)
	AMUC_RS04895	Amuc_0906	6988.66	2665.18	0.381357	7.54456e-40	B2UQK3_AKKM8	Multifunctional fusion protein [Includes: Peptide methionine sulfoxide reductase MsrB (EC 1.8.4.12) (Peptide-methionine (R)-S-oxide reductase); Peptide methionine sulfoxide reductase MsrA (Protein-methionine-S-oxide reductase) (EC 1.8.4.11) (Peptide-methionine (S)-S-oxide reductase) (Peptide Met(O) reductase)]
	AMUC_RS04900	Amuc_0907	136.089	57.1787	0.420157	4.31799e-08	B2UQK4_AKKM8	Uncharacterized protein
	AMUC_RS04905	Amuc_0908	413.706	194.277	0.469602	1.40841e-12	B2UQK5_AKKM8	Uncharacterized protein
	AMUC_RS04910	Amuc_0909	94.0196	43.4118	0.461731	1.02268e-05	B2UQK6_AKKM8	Uncharacterized protein
	AMUC_RS04915	Amuc_0910	103.357	25.2228	0.244034	1.87897e-13	B2UQK7_AKKM8	Transcriptional regulator, LysR family
	AMUC_RS04920	Amuc_0911	150.898	202.582	1.34251	0.0191331	B2UQK8_AKKM8	Major facilitator superfamily MFS_1
	AMUC_RS04925	Amuc_0912	259.982	57.3991	0.220781	3.65731e-32	B2UQK9_AKKM8	Uncharacterized protein
	AMUC_RS04930	Amuc_0913	670.878	215.55	0.321295	8.28962e-34
	AMUC_RS04935	Amuc_0914	3501.11	497.03	0.141964	7.14005e-216	B2UQL1_AKKM8	Cupin 2 conserved barrel domain protein
	AMUC_RS04940	Amuc_0915	937.645	1479.84	1.57825	3.27314e-11
	AMUC_RS04950	Amuc_0916	7.71728	10.0812	1.30632	0.543903
	AMUC_RS04955	Amuc_0917	215.093	418.82	1.94716	8.73564e-11	B2UQL4_AKKM8	Peptidase U32
	AMUC_RS04960	Amuc_0918	367.773	406.047	1.10407	0.424431
	AMUC_RS04965	Amuc_0919	365.387	514.063	1.4069	0.000162805	B2UQL6_AKKM8	Uncharacterized protein
	AMUC_RS04970	Amuc_0920	1188.93	147.14	0.123759	1.53743e-142	G1092_AKKM8	Glycosyl hydrolase family 109 protein 2 (EC 3.2.1.-)
	AMUC_RS04975	Amuc_0921	140.681	39.8834	0.283502	1.3623e-15	B2UQL8_AKKM8	Non-specific serine/threonine protein kinase (EC 2.7.11.1)
	AMUC_RS04980	Amuc_0922	979.449	100.572	0.102682	1.53872e-125	B2UQL9_AKKM8	Metallophosphoesterase
	AMUC_RS04985	Amuc_0923	2332.13	132.502	0.0568156	1.57822e-293	A0A1Y3SW60_9BACT	Probable endolytic peptidoglycan transglycosylase RlpA (EC 4.2.2.-)
	AMUC_RS04990	Amuc_0924	399.235	137.509	0.34443	3.30631e-16	B2UQM1_AKKM8	NAD kinase (EC 2.7.1.23) (ATP-dependent NAD kinase)
	AMUC_RS04995	Amuc_0925	70.7762	385.535	5.44724	4.29666e-43	RL24_AKKM8	50S ribosomal protein L24
	AMUC_RS05000	Amuc_0926	303.355	3568.42	11.7632	3.72406e-208	B2UQM3_AKKM8	50S ribosomal protein L5
	AMUC_RS05005	Amuc_0927	56.6715	414.078	7.30664	6.49336e-52	B2UQM4_AKKM8	30S ribosomal protein S8
	AMUC_RS05010	Amuc_0928	62.6647	291.267	4.64803	6.25042e-29	RL6_AKKM8	50S ribosomal protein L6
	AMUC_RS05015	Amuc_0929	17.5952	163.196	9.27507	6.22865e-25	B2UQM6_AKKM8	50S ribosomal protein L18
	AMUC_RS05020		21.8749	342.546	15.6594	1.46716e-46	A0A1Y3T2X4_9BACT	30S ribosomal protein S5
	AMUC_RS05025	Amuc_0931	43.292	248.595	5.74229	2.55833e-24	RL15_AKKM8	50S ribosomal protein L15
	AMUC_RS05030	Amuc_0933	340.349	979.719	2.87857	1.40618e-39	B2UQN0_AKKM8	Protein translocase subunit SecY
	AMUC_RS05035	Amuc_0934	31.2922	161.681	5.16683	3.59487e-19	B2UQN1_AKKM8	Adenylate kinase (AK) (EC 2.7.4.3) (ATP-AMP transphosphorylase) (ATP:AMP phosphotransferase) (Adenylate monophosphate kinase)
	AMUC_RS05040	Amuc_0935	54.9293	373.806	6.80523	1.22801e-43	B2UQN2_AKKM8	Methionine aminopeptidase (EC 3.4.11.18)
	AMUC_RS05045	Amuc_0936	28.1386	33.2787	1.18267	0.572984	B2UQN3_AKKM8	Uncharacterized protein
	AMUC_RS05055	Amuc_0938	287.648	792.838	2.75628	3.41462e-28	B2UQN5_AKKM8	Polyphosphate kinase (EC 2.7.4.1)
	AMUC_RS05060	Amuc_0939	25.154	26.5219	1.05438	0.8257
	AMUC_RS05065	Amuc_0940	135.208	66.6044	0.492608	6.59099e-07	B2UQN7_AKKM8	Uncharacterized protein
	AMUC_RS05075	Amuc_0942	51.6607	63.5521	1.23018	0.261758
	AMUC_RS05080	Amuc_0943	64.7731	69.8552	1.07846	0.704311
	AMUC_RS05085	Amuc_0944	205.721	170.589	0.829225	0.13551	A0A1Y3SW40_9BACT	Uncharacterized protein
	AMUC_RS05090		167.093	87.2795	0.52234	2.95156e-05
	AMUC_RS05100	Amuc_0946	1415.47	613.062	0.433116	9.80057e-16	A0A1Y3SWR6_9BACT	DJ-1 family protein
	AMUC_RS05110	Amuc_0948	249.332	971.856	3.89785	1.92184e-08	B2UQP5_AKKM8	N-acetylglucosamine-6-phosphate deacetylase
	AMUC_RS05115	Amuc_0949	621.837	402.91	0.647936	1.56947e-07
	AMUC_RS05120	Amuc_0950	85.2618	212.254	2.48944	2.11423e-12	B2UQP7_AKKM8	Uncharacterized protein
	AMUC_RS05125	Amuc_0951	150.698	133.12	0.883353	0.334675	B2UQP8_AKKM8	Carbon starvation protein CstA
	AMUC_RS05130	Amuc_0952	446.001	769.861	1.72614	7.8904e-10	B2UQP9_AKKM8	Uncharacterized protein
	AMUC_RS05140		5716.79	1322.45	0.231327	6.31003e-64	A0A1Y3SW35_9BACT	Ribosome-binding factor A
	AMUC_RS05145	Amuc_0956	706.789	2275.37	3.2193	4.77014e-34	B2UQQ3_AKKM8	Translation initiation factor IF-2
	AMUC_RS05150	Amuc_0957	756.556	967.473	1.27879	0.000609855	B2UQQ4_AKKM8	Transcription termination/antitermination protein NusA
	AMUC_RS05155	Amuc_0958	35.2959	52.4858	1.48702	0.103138	B2UQQ5_AKKM8	Exodeoxyribonuclease III Xth (EC 4.2.99.18)
	AMUC_RS05160	Amuc_0959	26.9297	81.9167	3.04187	2.71673e-07	B2UQQ6_AKKM8	dITP/XTP pyrophosphatase (EC 3.6.1.66) (Non-canonical purine NTP pyrophosphatase) (Non-standard purine NTP pyrophosphatase) (Nucleoside-triphosphate diphosphatase) (Nucleoside-triphosphate pyrophosphatase) (NTPase)
	AMUC_RS05165	Amuc_0960	13.7733	24.8922	1.80728	0.122636
	AMUC_RS05170	Amuc_0961	1654.57	644.281	0.389396	4.27131e-16	A0A1Y3T0V4_9BACT	Tat (Twin-arginine translocation) pathway signal sequence
	AMUC_RS05175	Amuc_0962	422.343	662.933	1.56966	1.07243e-05
	AMUC_RS05180	Amuc_0963	410.425	319.188	0.777702	0.0280172	B2UQR0_AKKM8	ABC transporter related
	AMUC_RS05185	Amuc_0964	327.948	82.3595	0.251136	5.27082e-29	A0A1Y3T2U8_9BACT	Uncharacterized protein
	AMUC_RS05190	Amuc_0965	587.975	1271.5	2.16252	5.1673e-27	B2UQR2_AKKM8	Uncharacterized protein
	AMUC_RS05195		65.2702	211.738	3.24403	5.82655e-14
	AMUC_RS05205		511.05	101.088	0.197805	3.9717e-47
	AMUC_RS05210	Amuc_0969	1158.66	370.265	0.319564	1.2003e-47
	AMUC_RS05220	Amuc_0971	165.651	194.104	1.17176	0.218509	B2UQR8_AKKM8	DNA helicase (EC 3.6.4.12)
	AMUC_RS05225	Amuc_0972	69.3709	226.961	3.27171	1.89527e-17	FMT_AKKM8	Methionyl-tRNA formyltransferase (EC 2.1.2.9)
	AMUC_RS05230	Amuc_0973	515.031	192.899	0.37454	0.0371513	B2UQS0_AKKM8	Monogalactosyldiacylglycerol synthase
	AMUC_RS05235	Amuc_0974	156.312	176.528	1.12933	0.407123	COAX_AKKM8	Type III pantothenate kinase (EC 2.7.1.33) (PanK-III) (Pantothenic acid kinase)
	AMUC_RS05240	Amuc_0975	4058.56	1162.2	0.286358	2.47388e-69	ACP_AKKM8	Acyl carrier protein (ACP)
	AMUC_RS05245	Amuc_0976	1613.12	242.286	0.150196	1.07118e-73	B2UQS3_AKKM8	Uncharacterized protein
	AMUC_RS05250	Amuc_0977	461.855	165.448	0.358225	2.30228e-24	B2UQS4_AKKM8	Uncharacterized protein
	AMUC_RS05255	Amuc_0978	184.3	123.523	0.670229	0.00131209	DTD_AKKM8	D-aminoacyl-tRNA deacylase (DTD) (EC 3.1.1.96) (Gly-tRNA(Ala) deacylase) (EC 3.1.1.-)
	AMUC_RS05260		80.5285	24.1179	0.299495	3.61378e-09
	AMUC_RS05265		66.6837	46.6451	0.699498	0.112343	A0A1Y3SW48_9BACT	Uncharacterized protein
	AMUC_RS05270		11.9823	174.876	14.5946	3.40523e-29
	AMUC_RS05280	Amuc_0983	738.498	206.3	0.279351	6.52747e-38	B2UQS7_AKKM8	YD repeat protein
	AMUC_RS05285	Amuc_0984	105.15	652.597	6.20636	6.41148e-50	B2UQS8_AKKM8	4Fe-4S ferredoxin iron-sulfur binding domain protein
	AMUC_RS05290	Amuc_0985	93.9128	947.318	10.0872	2.96549e-96
	AMUC_RS05295	Amuc_0986	98.9595	488.71	4.93848	2.58775e-44	B2UQT0_AKKM8	Succinate dehydrogenase (Or fumarate reductase) cytochrome b subunit, b558 family
	AMUC_RS05300		12.7287	4.01096	0.315111	0.0306081	A0A1Y3T0G2_9BACT	Uncharacterized protein
	AMUC_RS05305	Amuc_0987	184.534	153.853	0.833742	0.169942	A0A1Y3T0K3_9BACT	Uncharacterized protein
	AMUC_RS05310	Amuc_0988	404.105	443.342	1.0971	0.436653
	AMUC_RS05315		13.0896	10.0886	0.770732	0.533444	A0A1Y3SYA2_9BACT	Uncharacterized protein
	AMUC_RS05320	Amuc_0990	102.228	534.188	5.22545	1.55323e-50	B2UQT4_AKKM8	Uncharacterized protein
	AMUC_RS05325	Amuc_0991	47.0963	16.0436	0.340655	1.55784e-05	A0A1Y3SWN3_9BACT	PEP-CTERM sorting domain-containing protein
	AMUC_RS05335		208.839	106.597	0.510426	2.10068e-07	B2UQT6_AKKM8	Uncharacterized protein
	AMUC_RS05340	Amuc_0994	455.621	162.14	0.355867	2.71119e-22	B2UQT7_AKKM8	3-oxoacyl-(Acyl-carrier-protein) reductase
	AMUC_RS05345	Amuc_0995	103.859	62.9338	0.605956	0.00400659	B2UQT8_AKKM8	Uncharacterized protein
	AMUC_RS05350	Amuc_0996	140.946	284.058	2.01537	1.74245e-09	B2UQT9_AKKM8	ABC transporter related
	AMUC_RS05355	Amuc_0997	45.9409	28.6787	0.624253	0.0482659	B2UQU0_AKKM8	Uncharacterized protein
	AMUC_RS05360	Amuc_0999	15661	4853.6	0.309916	3.44974e-59	B2UQU2_AKKM8	Sigma 54 modulation protein/ribosomal protein S30EA
	AMUC_RS05370		147.841	44.0752	0.298126	1.00638e-14
	AMUC_RS05375	Amuc_1001	116.029	80.1223	0.690534	0.0207388	B2UQU3_AKKM8	Short-chain dehydrogenase/reductase SDR
	AMUC_RS05390	Amuc_1003	162.584	28.7986	0.17713	2.11146e-26
	AMUC_RS05405	Amuc_1007	291.506	139.224	0.477601	2.20603e-12	B2UQU8_AKKM8	Transcriptional regulator, AraC family
	AMUC_RS05410	Amuc_1008	1063.38	3584.73	3.37107	2.58421e-68	B2UQU9_AKKM8	Glycoside hydrolase family 31
	AMUC_RS05420	Amuc_1010	17.0278	15.815	0.928775	0.826752	B2UQV1_AKKM8	Response regulator receiver protein
	AMUC_RS05425	Amuc_1011	151.947	46.9505	0.308993	9.67663e-16	B2UQV2_AKKM8	Uncharacterized protein
	AMUC_RS05430	Amuc_1012	62.3425	30.9216	0.495996	0.000835637	B2UQV3_AKKM8	Uncharacterized protein
	AMUC_RS05435	Amuc_1013	27.7583	20.4103	0.735287	0.296477
	AMUC_RS05440	Amuc_1014	22.6741	13.2201	0.583049	0.127633	B2UQV5_AKKM8	Uncharacterized protein
	AMUC_RS05445	Amuc_1015	18.0863	13.1865	0.729085	0.460917	B2UQV6_AKKM8	Uncharacterized protein
	AMUC_RS05450	Amuc_1016	708.186	57.0387	0.080542	4.58988e-101	B2UQV7_AKKM8	Uncharacterized protein
	AMUC_RS05455	Amuc_1017	10005	387.787	0.0387594	0	B2UQV8_AKKM8	Uncharacterized protein
	AMUC_RS05460	Amuc_1018	329.565	66.3161	0.201223	2.04721e-37	B2UQV9_AKKM8	UPF0056 inner membrane protein
	AMUC_RS05465	Amuc_1019	2623.57	419.366	0.159846	1.56613e-112
	AMUC_RS05470	Amuc_1020	1127.64	151.406	0.134268	7.45271e-124	B2UQW1_AKKM8	Uncharacterized protein
	AMUC_RS05475	Amuc_1021	24154.8	1578.21	0.0653374	0	B2UQW2_AKKM8	Uncharacterized protein
	AMUC_RS05480		68.2114	153.242	2.24658	3.60475e-06	B2UQW3_AKKM8	Lipolytic protein G-D-S-L family
	AMUC_RS05485	Amuc_1023	51.3748	270.674	5.26861	4.1967e-28	B2UQW4_AKKM8	Uncharacterized protein
	AMUC_RS05490	Amuc_1024	462.52	1638.78	3.54316	1.25846e-64	A0A1Y3SVX3_9BACT	Uncharacterized protein
	AMUC_RS05495	Amuc_1025	1947.67	1503.12	0.771752	0.00158922	B2UQW6_AKKM8	Disulfide bond chaperones of the HSP33 family-like protein
	AMUC_RS05500	Amuc_1026	598.818	128.005	0.213763	1.93281e-49	B2UQW7_AKKM8	Peptidyl-prolyl cis-trans isomerase (PPIase) (EC 5.2.1.8)
	AMUC_RS05505	Amuc_1027	174.208	184.778	1.06068	0.688541	B2UQW8_AKKM8	ABC transporter related
	AMUC_RS05510	Amuc_1028	2084.8	721.014	0.345843	1.44898e-57	A0A1Y3SW15_9BACT	PEP-CTERM sorting domain-containing protein
	AMUC_RS05515	Amuc_1029	31.5956	52.5352	1.66274	0.0280224	B2UQX0_AKKM8	Uncharacterized protein
	AMUC_RS05520	Amuc_1030	43.0479	61.0958	1.41925	0.0989484	B2UQX1_AKKM8	Cupin 2 conserved barrel domain protein
	AMUC_RS05525	Amuc_1031	188.062	416.708	2.2158	4.48979e-14	B2UQX2_AKKM8	Cysteine--tRNA ligase (EC 6.1.1.16) (Cysteinyl-tRNA synthetase) (CysRS)
	AMUC_RS05535	Amuc_1033	225.683	398.639	1.76636	1.92423e-09	B2UQX4_AKKM8	Sulfatase
	AMUC_RS05540	Amuc_1034	288.252	308.94	1.07177	0.482358
	AMUC_RS05550	Amuc_1036	373.472	1092.97	2.92651	8.33398e-41	B2UQX7_AKKM8	Elongation factor 4 (EF-4) (EC 3.6.5.n1) (Ribosomal back-translocase LepA)
	AMUC_RS05555	Amuc_1037	917.456	46.0636	0.0502079	6.94959e-135	B2UQX8_AKKM8	Uncharacterized protein
	AMUC_RS05560	Amuc_1039	1782.35	652.848	0.366285	1.82485e-29	B2UQY0_AKKM8	Outer membrane autotransporter barrel domain protein
	AMUC_RS05565	Amuc_1040	779.564	2773.96	3.55835	2.73212e-80	RPOC_AKKM8	DNA-directed RNA polymerase subunit beta' (RNAP subunit beta') (EC 2.7.7.6) (RNA polymerase subunit beta') (Transcriptase subunit beta')
	AMUC_RS05570	Amuc_1041	1102.71	2828.65	2.56519	3.36146e-51
	AMUC_RS05575	Amuc_1042	118.209	837.799	7.08745	2.49304e-36	RL7_AKKM8	50S ribosomal protein L7/L12
	AMUC_RS05580	Amuc_1043	187.201	722.838	3.8613	1.78284e-48	B2UQY4_AKKM8	50S ribosomal protein L10
	AMUC_RS05585	Amuc_1044	232.91	2548.97	10.944	7.81045e-198	B2UQY5_AKKM8	50S ribosomal protein L1
	AMUC_RS05590	Amuc_1045	96.0077	758.267	7.89798	8.03936e-86	RL11_AKKM8	50S ribosomal protein L11
	AMUC_RS05595	Amuc_1046	409.733	1323.99	3.23135	1.21399e-52	B2UQY7_AKKM8	Transcription termination/antitermination protein NusG
	AMUC_RS05600	Amuc_1047	375.973	983.348	2.61547	4.18131e-25	B2UQY8_AKKM8	Preprotein translocase, SecE subunit
	AMUC_RS05610	Amuc_1048	3283.94	15295	4.65751	1.1319e-145	EFTU_AKKM8	Elongation factor Tu (EF-Tu)
	AMUC_RS05620	Amuc_1049	161.033	462.958	2.87493	3.12997e-22	B2UQZ0_AKKM8	tRNA N6-adenosine threonylcarbamoyltransferase (EC 2.3.1.234) (N6-L-threonylcarbamoyladenine synthase) (t(6)A synthase) (t(6)A37 threonylcarbamoyladenosine biosynthesis protein TsaD) (tRNA threonylcarbamoyladenosine biosynthesis protein TsaD)
	AMUC_RS05625	Amuc_1050	836.284	1018.97	1.21845	0.013279	B2UQZ1_AKKM8	ATP-dependent Clp protease ATP-binding subunit ClpX
	AMUC_RS05630	Amuc_1051	1160.4	1027.15	0.885171	0.132424	B2UQZ2_AKKM8	Endopeptidase Clp (EC 3.4.21.92)
	AMUC_RS05635	Amuc_1052	260.431	927.601	3.56179	3.99524e-49	A0A1Y3SVZ2_9BACT	Trigger factor (TF) (EC 5.2.1.8) (PPIase)
	AMUC_RS05640	Amuc_1053	664.633	1821.49	2.74059	4.88954e-44
	AMUC_RS05645	Amuc_1054	85.9274	314.22	3.65681	2.66493e-25	B2UQZ5_AKKM8	Uncharacterized protein
	AMUC_RS05650	Amuc_1055	82.4591	127.466	1.54581	0.00488132	B2UQZ6_AKKM8	Methylenetetrahydrofolate reductase (EC 1.5.1.20)
	AMUC_RS05655	Amuc_1056	366.739	472.021	1.28708	0.00389555	B2UQZ7_AKKM8	Uncharacterized protein
	AMUC_RS05660	Amuc_1057	1023.27	292.322	0.285674	5.69636e-27	B2UQZ8_AKKM8	Uncharacterized protein
	AMUC_RS05665	Amuc_1058	294.727	174.216	0.59111	5.03842e-07
	AMUC_RS05670	Amuc_1059	218.252	177.4	0.812821	0.104325	B2UR00_AKKM8	Acriflavin resistance protein
	AMUC_RS05675	Amuc_1060	192.318	147.535	0.767138	0.028557	B2UR01_AKKM8	Membrane-fusion protein-like protein
	AMUC_RS05680	Amuc_1061	817.262	176.568	0.216049	4.48849e-63	A0A1Y3SVY5_9BACT	Uncharacterized protein
	AMUC_RS05685	Amuc_1062	36.8523	118.234	3.20833	2.54024e-10	A0A1Y3SVY2_9BACT	Uncharacterized protein
	AMUC_RS05690	Amuc_1063	50.4705	272.761	5.40436	8.73206e-30	B2UR04_AKKM8	Ankyrin
	AMUC_RS05695	Amuc_1064	195.026	304.607	1.56188	3.57129e-05	B2UR05_AKKM8	Major facilitator superfamily MFS_1
	AMUC_RS05700	Amuc_1065	251.049	540.825	2.15426	1.63144e-13	A0A1Y3T099_9BACT	Uncharacterized protein
	AMUC_RS05705		16.7872	8.04449	0.479205	0.0764725	A0A1Y3T0E1_9BACT	Uncharacterized protein
	AMUC_RS05710	Amuc_1066	109.833	120.924	1.10098	0.535751	B2UR07_AKKM8	Uncharacterized protein
	AMUC_RS05715	Amuc_1067	245.585	122.207	0.497617	2.97813e-09	B2UR08_AKKM8	Transcriptional regulator, ArsR family
	AMUC_RS05720	Amuc_1068	163.566	138.981	0.849696	0.236863	METK_AKKM8	S-adenosylmethionine synthase (AdoMet synthase) (EC 2.5.1.6) (MAT) (Methionine adenosyltransferase)
	AMUC_RS05725	Amuc_1069	289.733	406.372	1.40257	0.0032582	B2UR10_AKKM8	Adenosylhomocysteinase (EC 3.3.1.1)
	AMUC_RS05730	Amuc_1070	155.782	34.1142	0.218986	2.75289e-19	B2UR11_AKKM8	Glycosyl transferase family 2
	AMUC_RS05735		21.2921	5.50513	0.258552	0.000671996	A0A1Y3SVX2_9BACT	Uncharacterized protein
	AMUC_RS05740	Amuc_1071	268.515	124.636	0.464169	5.41677e-09	B2UR12_AKKM8	Uncharacterized protein
	AMUC_RS05745	Amuc_1072	83.3164	73.9341	0.887389	0.567377	B2UR13_AKKM8	Uncharacterized protein
	AMUC_RS05750	Amuc_1073	38.811	19.53	0.503207	0.0068997
	AMUC_RS05755	Amuc_1074	308.924	1160.51	3.75663	4.16689e-63	B2UR15_AKKM8	Sulfatase
	AMUC_RS05760	Amuc_1075	98.2646	232.419	2.36523	1.74271e-11	B2UR16_AKKM8	ATP-dependent DNA helicase, RecQ family
	AMUC_RS05765	Amuc_1076	56.5025	121.604	2.15219	1.05322e-05	B2UR17_AKKM8	Glycosyltransferase-like protein
	AMUC_RS05785		375.324	218.894	0.583213	4.32415e-08
	AMUC_RS05790	Amuc_1079	1222.33	651.739	0.533195	2.28636e-13	B2UR20_AKKM8	L-aspartate oxidase (EC 1.4.3.16)
	AMUC_RS05795	Amuc_1080	69.0675	40.8913	0.592049	0.00596743	B2UR21_AKKM8	RNA methyltransferase, TrmH family, group 3
	AMUC_RS05800	Amuc_1081	52.7521	64.2702	1.21834	0.348854	B2UR22_AKKM8	Uncharacterized protein
	AMUC_RS05805		1610.4	203.576	0.126414	5.71643e-149	A0A1Y3SVW2_9BACT	Uncharacterized protein
	AMUC_RS05810	Amuc_1082	371.789	194.022	0.52186	8.74416e-08	B2UR23_AKKM8	Iron dependent repressor
	AMUC_RS05815	Amuc_1083	96.2142	103.222	1.07284	0.608239	B2UR24_AKKM8	Heavy metal translocating P-type ATPase
	AMUC_RS05820	Amuc_1084	1414.12	377.952	0.267271	1.79958e-50
	AMUC_RS05825		139.935	100.958	0.72146	0.016259	A0A1Y3T0C2_9BACT	Uncharacterized protein
	AMUC_RS05830	Amuc_1085	160.447	75.7755	0.472276	4.02893e-08
	AMUC_RS05835	Amuc_1086	1729	112.393	0.0650048	1.95523e-201	B2UR27_AKKM8	Uncharacterized protein
	AMUC_RS05840	Amuc_1088	1543.35	2081.68	1.34881	6.77449e-06	B2UR29_AKKM8	Ferrous iron transport protein B
	AMUC_RS05845	Amuc_1089	965.901	457.441	0.47359	1.81272e-14	B2UR30_AKKM8	FeoA family protein
	AMUC_RS05850	Amuc_1090	2191.07	464.704	0.21209	2.89136e-63	B2UR31_AKKM8	FeoA family protein
	AMUC_RS05855	Amuc_1091	415.603	459.532	1.1057	0.265257
	AMUC_RS05860	Amuc_1092	219.315	122.907	0.560415	2.76831e-05	B2UR33_AKKM8	Lipoyl synthase (EC 2.8.1.8) (Lip-syn) (LS) (Lipoate synthase) (Lipoic acid synthase) (Sulfur insertion protein LipA)
	AMUC_RS05865	Amuc_1093	483.53	159.5	0.329865	1.19433e-19
	AMUC_RS05870	Amuc_1094	421.168	889.141	2.11113	9.74718e-16
	AMUC_RS05875	Amuc_1095	225.005	456.884	2.03055	8.92371e-12	B2UR36_AKKM8	Heavy metal translocating P-type ATPase
	AMUC_RS05880	Amuc_1096	903.454	1422.74	1.57478	1.71724e-10	RHO_AKKM8	Transcription termination factor Rho (EC 3.6.4.-) (ATP-dependent helicase Rho)
	AMUC_RS05890	Amuc_1098	1199.91	2469.62	2.05817	4.2313e-21	B2UR39_AKKM8	Type II and III secretion system protein
	AMUC_RS05895	Amuc_1099	184.037	1152.89	6.26441	1.4387e-77	B2UR40_AKKM8	Uncharacterized protein
	AMUC_RS05900	Amuc_1100	85.0085	458.628	5.39509	4.01939e-44	B2UR41_AKKM8	Uncharacterized protein
	AMUC_RS05905	Amuc_1101	534.941	1173.01	2.19279	5.15541e-23
	AMUC_RS05910	Amuc_1102	309.539	356.583	1.15198	0.154379	B2UR43_AKKM8	Uncharacterized protein
	AMUC_RS05915	Amuc_1103	115.707	464.5	4.01444	3.31811e-33	B2UR44_AKKM8	Glutamyl aminopeptidase (EC 3.4.11.7)
	AMUC_RS05925	Amuc_1105	354.279	237.026	0.669039	6.81493e-05	B2UR46_AKKM8	Uncharacterized protein
	AMUC_RS05930	Amuc_1106	1004.12	1860.01	1.85238	1.84936e-19	B2UR47_AKKM8	Peptidase M24
	AMUC_RS05935	Amuc_1107	467.991	499.61	1.06756	0.440547	B2UR48_AKKM8	ATP phosphoribosyltransferase (ATP-PRT) (ATP-PRTase) (EC 2.4.2.17)
	AMUC_RS05940		224.964	274.818	1.22161	0.0587358	A0A1Y3SVP5_9BACT	Uncharacterized protein
	AMUC_RS05945		11.1302	21.994	1.97607	0.0709437	A0A1Y3SY06_9BACT	Uncharacterized protein
	AMUC_RS05955	Amuc_1110	626.354	251.76	0.401945	7.2398e-19	B2UR51_AKKM8	Two component transcriptional regulator, winged helix family
	AMUC_RS05960	Amuc_1111	1166.87	1138.7	0.975864	0.737192	ILVD_AKKM8	Dihydroxy-acid dehydratase (DAD) (EC 4.2.1.9)
	AMUC_RS05965	Amuc_1114	509.201	324.361	0.637	2.75795e-07
	AMUC_RS05970	Amuc_1115	92.1311	36.671	0.398031	1.26657e-07	B2UR56_AKKM8	Integrase family protein
	AMUC_RS05975	Amuc_1116	133.606	102.137	0.764468	0.0590296	B2UR57_AKKM8	Phage SPO1 DNA polymerase-related protein
	AMUC_RS05980	Amuc_1117	77.1931	447.38	5.79559	4.46998e-40	B2UR58_AKKM8	Biotin and thiamin synthesis associated
	AMUC_RS05985	Amuc_1118	401.069	1340.68	3.34277	1.30346e-59	B2UR59_AKKM8	Sulfatase
	AMUC_RS05995	Amuc_1120	1001.99	424.075	0.423232	6.46838e-20
	AMUC_RS06000	Amuc_1121	54.6206	83.9058	1.53616	0.0320815	B2UR62_AKKM8	Uncharacterized protein
	AMUC_RS06010	Amuc_1123	776.671	609.662	0.784968	0.00139286	B2UR64_AKKM8	Uncharacterized protein
	AMUC_RS06015	Amuc_1124	356.004	548.986	1.54208	9.02061e-06	B2UR65_AKKM8	Uncharacterized protein
	AMUC_RS06020	Amuc_1125	1389.14	1574.95	1.13376	0.0679094	B2UR66_AKKM8	UDP-glucose 4-epimerase
	AMUC_RS06025	Amuc_1126	495.013	1337.85	2.70266	3.02798e-40	B2UR67_AKKM8	Ribosomal RNA small subunit methyltransferase A (EC 2.1.1.182) (16S rRNA (adenine(1518)-N(6)/adenine(1519)-N(6))-dimethyltransferase) (16S rRNA dimethyladenosine transferase) (16S rRNA dimethylase) (S-adenosylmethionine-6-N', N'-adenosyl(rRNA) dimethyltransferase)
	AMUC_RS06030	Amuc_1127	88.1976	493.575	5.59624	7.08292e-48	B2UR68_AKKM8	Uncharacterized protein
	AMUC_RS06035	Amuc_1128	47.5828	467.687	9.82891	9.07489e-63	B2UR69_AKKM8	Uncharacterized protein
	AMUC_RS06045	Amuc_1131	86.2529	59.7588	0.692832	0.0297057	B2UR72_AKKM8	MATE efflux family protein
	AMUC_RS06050	Amuc_1132	152.919	127.648	0.834743	0.157667
	AMUC_RS06060	Amuc_1133	11.3173	13.2839	1.17376	0.737192
	AMUC_RS06065	Amuc_1134	23.8248	10.5495	0.442794	0.0201104	B2UR75_AKKM8	Peptidase M15B and M15C DD-carboxypeptidase VanY/endolysin
	AMUC_RS06070	Amuc_1135	15.049	6.41541	0.426301	0.0447268	B2UR76_AKKM8	Uncharacterized protein
	AMUC_RS06075	Amuc_1136	71.3796	64.776	0.907486	0.705991
	AMUC_RS06080	Amuc_1137	81.5649	59.3513	0.727657	0.0712837	B2UR78_AKKM8	Uncharacterized protein
	AMUC_RS06085	Amuc_1138	4.48215	11.115	2.47984	0.124906
	AMUC_RS06090	Amuc_1139	20.7334	33.7613	1.62835	0.105467	B2UR80_AKKM8	Uncharacterized protein
	AMUC_RS06095	Amuc_1140	29.703	21.0727	0.709447	0.267034	B2UR81_AKKM8	Uncharacterized protein
	AMUC_RS06100	Amuc_1141	11.5111	9.6657	0.839685	0.76001	B2UR82_AKKM8	Glycosyl transferase family 11
	AMUC_RS06110	Amuc_1143	1108.77	2360.14	2.12862	1.65011e-19	B2UR84_AKKM8	YD repeat protein
	AMUC_RS06115	Amuc_1145	1312.4	474.901	0.361858	3.07343e-34
	AMUC_RS06120		384.507	351.65	0.914547	0.543545
	AMUC_RS06125	Amuc_1146	292.807	95.0805	0.324721	1.01795e-22	B2UR87_AKKM8	Uncharacterized protein
	AMUC_RS06130	Amuc_1148	14.346	12.2308	0.852561	0.75695	B2UR89_AKKM8	Uncharacterized protein
	AMUC_RS06135	Amuc_1149	82.9468	109.386	1.31875	0.0800436
	AMUC_RS06140	Amuc_1151	244.671	147.422	0.602531	0.000762579	A0A1Y3SYP0_9BACT	Potassium-transporting ATPase potassium-binding subunit (ATP phosphohydrolase [potassium-transporting] A chain) (Potassium-binding and translocating subunit A) (Potassium-translocating ATPase A chain)
	AMUC_RS06145	Amuc_1152	160.88	140.235	0.871674	0.31378	B2UR92_AKKM8	Potassium-transporting ATPase ATP-binding subunit (EC 3.6.3.12) (ATP phosphohydrolase [potassium-transporting] B chain) (Potassium-binding and translocating subunit B) (Potassium-translocating ATPase B chain)
	AMUC_RS06150	Amuc_1153	86.172	30.2363	0.350883	5.28031e-08	B2UR93_AKKM8	Potassium-transporting ATPase KdpC subunit (ATP phosphohydrolase [potassium-transporting] C chain) (Potassium-binding and translocating subunit C) (Potassium-translocating ATPase C chain)
	AMUC_RS06155	Amuc_1154	70.9646	44.2098	0.622985	0.0223136	B2UR94_AKKM8	Osmosensitive K channel His kinase sensor
	AMUC_RS06160		8.89146	1.29954	0.146156	0.00444415
	AMUC_RS06165	Amuc_1155	164.665	43.7899	0.265933	6.15048e-18	B2UR95_AKKM8	Uncharacterized protein
	AMUC_RS06170	Amuc_1156	27.9307	12.8196	0.45898	0.0438373
	AMUC_RS06175	Amuc_1157	736.02	234.542	0.318663	1.52507e-28	B2UR97_AKKM8	Beta-lactamase domain protein
	AMUC_RS06180	Amuc_1158	135.686	76.3273	0.562531	0.000103193	B2UR98_AKKM8	RNA polymerase, sigma-24 subunit, ECF subfamily
	AMUC_RS06185	Amuc_1159	384.878	272.263	0.707402	0.000462891	B2UR99_AKKM8	Serine/threonine protein kinase
	AMUC_RS06190	Amuc_1160	44.6277	64.5035	1.44537	0.0710816	B2URA0_AKKM8	Aldo/keto reductase
	AMUC_RS06195		21.7879	20.7363	0.951736	0.919352	A0A1Y3SW88_9BACT	MerR family transcriptional regulator
	AMUC_RS06200		3.91879	1.87241	0.477803	0.370431	A0A1Y3SVN8_9BACT	Uncharacterized protein
	AMUC_RS06205	Amuc_1162	29.8949	75.361	2.52086	0.000175039	B2URA2_AKKM8	Threonine aldolase (EC 4.1.2.5)
	AMUC_RS06210	Amuc_1163	116.876	101.354	0.867191	0.366939
	AMUC_RS06215	Amuc_1164	22.4482	41.8757	1.86544	0.0177707	B2URA4_AKKM8	von Willebrand factor type A
	AMUC_RS06220	Amuc_1165	9.98349	22.7921	2.28298	0.0627799	B2URA5_AKKM8	Uncharacterized protein
	AMUC_RS06225	Amuc_1166	6.93207	25.3046	3.65036	0.00102296
	AMUC_RS06230	Amuc_1167	12.7521	34.6554	2.71762	0.00151347	B2URA7_AKKM8	Uncharacterized protein
	AMUC_RS06235	Amuc_1168	19.213	30.6707	1.59635	0.135042
	AMUC_RS06240	Amuc_1169	29.4378	56.0325	1.90342	0.00442906	B2URA9_AKKM8	Uncharacterized protein
	AMUC_RS06245	Amuc_1170	64.6721	52.7932	0.816321	0.274393
	AMUC_RS06250	Amuc_1171	26.4638	12.0023	0.453537	0.0220489	B2URB1_AKKM8	Uncharacterized protein
	AMUC_RS06255	Amuc_1172	0.423689	5.6176	13.2588	0.0289607	B2URB2_AKKM8	Uncharacterized protein
	AMUC_RS06260	Amuc_1173	359.019	204.548	0.569741	1.48629e-08	B2URB3_AKKM8	Uncharacterized protein
	AMUC_RS06265	Amuc_1174	83.9902	30.3906	0.361836	5.46101e-08	B2URB4_AKKM8	Uncharacterized protein
	AMUC_RS06270	Amuc_1175	181.779	153.296	0.843307	0.182302	B2URB5_AKKM8	Band 7 protein
	AMUC_RS06275	Amuc_1176	3088.34	1026.46	0.332366	1.31552e-27	A0A1Y3T298_9BACT	TIGR01777 family protein
	AMUC_RS06280	Amuc_1177	581.167	164.523	0.28309	9.71498e-37	B2URB7_AKKM8	Lipocalin family protein
	AMUC_RS06285		157.101	51.6727	0.328913	2.05099e-13	A0A1Y3T023_9BACT	Uncharacterized protein
	AMUC_RS06290	Amuc_1178	2946.61	4984.64	1.69165	1.0886e-16	ILVC_AKKM8	Ketol-acid reductoisomerase (NADP(+)) (KARI) (EC 1.1.1.86) (Acetohydroxy-acid isomeroreductase) (AHIR) (Alpha-keto-beta-hydroxylacyl reductoisomerase) (Ketol-acid reductoisomerase type 1) (Ketol-acid reductoisomerase type I)
	AMUC_RS06295	Amuc_1179	577.918	2440.35	4.22265	8.98927e-87
	AMUC_RS06300	Amuc_1180	190.392	864.956	4.54304	4.34606e-59	B2URC0_AKKM8	GntR domain protein
	AMUC_RS06305		488.174	371.007	0.759988	0.00685962	A0A1Y3SW58_9BACT	Uncharacterized protein
	AMUC_RS06310		791.285	258.926	0.327222	2.79334e-39	B2URC2_AKKM8	Sulfatase
	AMUC_RS06315	Amuc_1183	2416.98	827.244	0.342263	6.27054e-67	B2URC3_AKKM8	Uncharacterized protein
	AMUC_RS06320	Amuc_1184	7088.05	2086.91	0.294427	5.76561e-75
	AMUC_RS06325		457.481	982.825	2.14834	2.53221e-23	A0A1Y3T6H7_9BACT	LL-diaminopimelate aminotransferase
	AMUC_RS06330		138.873	631.025	4.54392	3.16307e-51
	AMUC_RS06335	Amuc_1187	153.079	196.251	1.28203	0.035981
	AMUC_RS06340	Amuc_1188	338511	23729.7	0.0701004	0	B2URC8_AKKM8	Uncharacterized protein
	AMUC_RS06345	Amuc_1189	524.417	305.228	0.582033	6.96669e-08	RL28_AKKM8	50S ribosomal protein L28
	AMUC_RS06350		13.4364	5.61392	0.417814	0.0729985	A0A1Y3SVG2_9BACT	Uncharacterized protein
	AMUC_RS06355	Amuc_1190	794.714	861.14	1.08359	0.288758	B2URD0_AKKM8	Alcohol dehydrogenase zinc-binding domain protein
	AMUC_RS06360	Amuc_1191	45.2386	80.9172	1.78868	0.0126539	B2URD1_AKKM8	Putative pre-16S rRNA nuclease (EC 3.1.-.-)
	AMUC_RS06365	Amuc_1192	203.713	264.817	1.29995	0.0226335	B2URD2_AKKM8	Mannose-1-phosphate guanylyltransferase (GDP) (EC 2.7.7.22)
	AMUC_RS06370	Amuc_1193	370.626	319.857	0.863017	0.127071	B2URD3_AKKM8	Isoprenyl transferase (EC 2.5.1.-)
	AMUC_RS06375	Amuc_1194	2740.46	869.113	0.317141	2.54603e-63	B2URD4_AKKM8	DNA topoisomerase (ATP-hydrolyzing) (EC 5.99.1.3)
	AMUC_RS06380	Amuc_1195	42.5274	80.3349	1.88902	0.00184158	B2URD5_AKKM8	4-diphosphocytidyl-2-C-methyl-D-erythritol kinase (CMK) (EC 2.7.1.148) (4-(cytidine-5'-diphospho)-2-C-methyl-D-erythritol kinase)
	AMUC_RS06385	Amuc_1196	44.6258	106.458	2.38556	4.1753e-06	A0A1Y3T5K2_9BACT	Uncharacterized protein
	AMUC_RS06390	Amuc_1197	57.277	96.4466	1.68386	0.00535512	B2URD7_AKKM8	Helicase c2
	AMUC_RS06395	Amuc_1198	40.723	141.829	3.48279	9.26716e-13	B2URD8_AKKM8	Cobalt ABC transporter, ATPase subunit
	AMUC_RS06400	Amuc_1199	71.9651	122.795	1.70632	0.00119688	B2URD9_AKKM8	Cobalt ABC transporter, inner membrane subunit CbiQ
	AMUC_RS06405	Amuc_1200	363.542	267.16	0.73488	0.00342622	B2URE0_AKKM8	Cobalamin (Vitamin B12) biosynthesis CbiM protein
	AMUC_RS06410	Amuc_1201	2.04094	3.68877	1.80739	0.579646	B2URE1_AKKM8	Uncharacterized protein
	AMUC_RS06415	Amuc_1202	27.8245	68.1351	2.44874	0.000110971	B2URE2_AKKM8	Uncharacterized protein
	AMUC_RS06420	Amuc_1203	87.7886	282.177	3.21427	2.91466e-19	ARGB_AKKM8	Acetylglutamate kinase (EC 2.7.2.8) (N-acetyl-L-glutamate 5-phosphotransferase) (NAG kinase) (NAGK)
	AMUC_RS06425	Amuc_1204	743.605	633.283	0.851639	0.0490171	B2URE4_AKKM8	Mg2 transporter protein CorA family protein
	AMUC_RS06430	Amuc_1205	812.394	1062.19	1.30748	0.0256164	B2URE5_AKKM8	50S ribosomal protein L9
	AMUC_RS06435	Amuc_1206	360.98	2616.73	7.24897	3.3288e-165	B2URE6_AKKM8	Bifunctional purine biosynthesis protein PurH [Includes: IMP cyclohydrolase (EC 3.5.4.10) (IMP synthase) (ATIC) (Inosinicase); Phosphoribosylaminoimidazolecarboxamide formyltransferase (EC 2.1.2.3) (AICAR transformylase)]
	AMUC_RS06440	Amuc_1207	1755.77	776.975	0.442526	3.73271e-21	PDXJ_AKKM8	Pyridoxine 5'-phosphate synthase (PNP synthase) (EC 2.6.99.2)
	AMUC_RS06445	Amuc_1208	375.846	202.804	0.539594	4.04468e-05	B2URE8_AKKM8	Holo-[acyl-carrier-protein] synthase (Holo-ACP synthase) (EC 2.7.8.7) (4'-phosphopantetheinyl transferase AcpS)
	AMUC_RS06450	Amuc_1209	269.491	122.431	0.454305	7.35803e-13	B2URE9_AKKM8	Uncharacterized protein
	AMUC_RS06455	Amuc_1210	4642.76	6344.79	1.3666	2.78563e-06	B2URF0_AKKM8	Phosphoenolpyruvate carboxykinase [GTP] (PEP carboxykinase) (PEPCK) (EC 4.1.1.32) (GTP-dependent phosphoenolpyruvate carboxykinase) (GTP-PEPCK)
	AMUC_RS06460	Amuc_1211	281.598	142.813	0.507151	0.0278515	B2URF1_AKKM8	N-acetylmuramoyl-L-alanine amidase family 2
	AMUC_RS06465	Amuc_1212	108.611	262.079	2.41301	1.42009e-12
	AMUC_RS06470	Amuc_1213	22116.8	1940.5	0.0877389	8.00845e-268	B2URF3_AKKM8	Uncharacterized protein
	AMUC_RS06475	Amuc_1214	161.431	180.442	1.11777	0.35867
	AMUC_RS06485	Amuc_1215	132.366	52.8349	0.399156	6.87349e-07	B2URF5_AKKM8	Putative cytochrome c
	AMUC_RS06490	Amuc_1216	1016.85	505.799	0.49742	1.45171e-16
	AMUC_RS06495	Amuc_1217	1434.2	281.753	0.196453	1.1015e-76	A0A1Y3T5H9_9BACT	Uncharacterized protein
	AMUC_RS06500	Amuc_1218	4110.95	769.721	0.187237	8.91433e-163	B2URF8_AKKM8	3-dehydroquinate synthase (DHQS) (EC 4.2.3.4)
	AMUC_RS06505	Amuc_1219	11411.7	808.379	0.0708375	9.11363e-256	B2URF9_AKKM8	Uncharacterized protein
	AMUC_RS06510		0	0	#DIV/0!	NA
	AMUC_RS06540	Amuc_1220	242.294	313.776	1.29502	0.0191805
	AMUC_RS06545	Amuc_1222	318.542	52.348	0.164336	3.00101e-44
	AMUC_RS06550	Amuc_1223	217.684	77.9248	0.357972	9.11724e-14	B2URG3_AKKM8	Orotidine 5'-phosphate decarboxylase
	AMUC_RS06555	Amuc_1224	780.705	1118.52	1.43271	5.18056e-07
	AMUC_RS06560	Amuc_1225	1336.83	2920.26	2.18447	4.86144e-29
	AMUC_RS06565	Amuc_1226	39.4953	138.138	3.49757	3.77782e-12	A0A1Y3SR39_9BACT	Uncharacterized protein
	AMUC_RS06570	Amuc_1227	31.8249	73.836	2.32007	0.00010163	Y1227_AKKM8	Nucleoid-associated protein Amuc_1227
	AMUC_RS06580	Amuc_1229	4847.13	3002.02	0.61934	5.85331e-09	A0A1Y3SQZ1_9BACT	Uncharacterized protein
	AMUC_RS06585	Amuc_1230	2325.06	3180.99	1.36813	9.1754e-05
	AMUC_RS06595	Amuc_1231	66.0734	100.439	1.52011	0.0117228	B2URH1_AKKM8	DNA repair protein RadC
	AMUC_RS06610	Amuc_1233	724.345	1166.93	1.61102	3.67884e-12	A0A1Y3SYU9_9BACT	Translation initiation factor IF-1
	AMUC_RS06615	Amuc_1234	422.084	1992.33	4.72022	8.42335e-77	RL13_AKKM8	50S ribosomal protein L13
	AMUC_RS06620	Amuc_1235	214.563	479.573	2.23512	1.25151e-14	B2URH5_AKKM8	30S ribosomal protein S9
	AMUC_RS06625	Amuc_1236	77.5131	45.1384	0.582332	0.00486825	RLMH_AKKM8	Ribosomal RNA large subunit methyltransferase H (EC 2.1.1.177) (23S rRNA (pseudouridine1915-N3)-methyltransferase) (23S rRNA m3Psi1915 methyltransferase) (rRNA (pseudouridine-N3-)-methyltransferase RlmH)
	AMUC_RS06630	Amuc_1237	1068.63	340.026	0.318188	1.72593e-41	B2URH7_AKKM8	UvrABC system protein C
	AMUC_RS06635	Amuc_1238	838.657	232.729	0.277502	8.98692e-47	B2URH8_AKKM8	MotA/TolQ/ExbB proton channel
	AMUC_RS06640	Amuc_1239	92.3877	133.425	1.44418	0.0198306	B2URH9_AKKM8	Biopolymer transport protein ExbD/TolR
	AMUC_RS06645	Amuc_1240	335.427	1237.72	3.68998	2.68849e-55	A0A1Y3SYV5_9BACT	Uncharacterized protein
	AMUC_RS06650	Amuc_1241	224.148	620.301	2.76737	2.71299e-28	B2URI1_AKKM8	Glycosyl transferase family 51
	AMUC_RS06655	Amuc_1242	70.4728	325.963	4.62537	2.15676e-32	B2URI2_AKKM8	Inositol-1-monophosphatase (EC 3.1.3.25)
	AMUC_RS06660	Amuc_1243	21.1718	74.083	3.49913	1.99195e-07
	AMUC_RS06670	Amuc_1245	211.432	180.952	0.855839	0.217792	B2URI5_AKKM8	Mannose-6-phosphate isomerase (EC 5.3.1.8)
	AMUC_RS06675	Amuc_1246	890.97	4439.75	4.98305	5.6382e-142	B2URI6_AKKM8	Uncharacterized protein
	AMUC_RS06680	Amuc_1247	46.8886	127.966	2.72914	7.26001e-09	B2URI7_AKKM8	Na+/H+ antiporter NhaC
	AMUC_RS06685	Amuc_1248	100.552	393.376	3.91216	4.72852e-31	B2URI8_AKKM8	GDP-L-fucose synthase (EC 1.1.1.271) (GDP-4-keto-6-deoxy-D-mannose-3,5-epimerase-4-reductase)
	AMUC_RS06690	Amuc_1249	123.834	391.48	3.16134	7.08153e-25	B2URI9_AKKM8	GDP-mannose 4,6-dehydratase (EC 4.2.1.47) (GDP-D-mannose dehydratase)
	AMUC_RS06695	Amuc_1250	69.3361	631.329	9.10534	4.20451e-76	CARA_AKKM8	Carbamoyl-phosphate synthase small chain (EC 6.3.5.5) (Carbamoyl-phosphate synthetase glutamine chain)
	AMUC_RS06700	Amuc_1251	562.116	2655.01	4.72325	6.78035e-90	B2URJ1_AKKM8	Carbamoyl-phosphate synthase large chain (EC 6.3.5.5) (Carbamoyl-phosphate synthetase ammonia chain)
	AMUC_RS06705	Amuc_1252	484.587	1084.9	2.23881	4.05192e-27	A0A1Y3T6P0_9BACT	Glutamine synthetase type III
	AMUC_RS06710		5.57945	6.80415	1.2195	0.66397
	AMUC_RS06715	Amuc_1253	1822.61	2599.12	1.42605	3.32793e-06	B2URJ3_AKKM8	Glutamate synthase (Ferredoxin) (EC 1.4.7.1)
	AMUC_RS06720		507.503	267.028	0.52616	1.55341e-13	A0A1Y3SZG4_9BACT	Uncharacterized protein
	AMUC_RS06730	Amuc_1255	164.464	158.254	0.962241	0.808301
	AMUC_RS06735		477.366	290.26	0.608045	1.8598e-07
	AMUC_RS06740	Amuc_1257	858.142	428.121	0.498893	5.44457e-11	B2URJ7_AKKM8	50S ribosomal protein L34
	AMUC_RS06745	Amuc_1258	331.934	490.347	1.47725	0.000174955	B2URJ8_AKKM8	Glutamine synthetase catalytic region
	AMUC_RS06755	Amuc_1260	90.4223	119.675	1.32351	0.0543463
	AMUC_RS06760	Amuc_1261	42.9317	114.155	2.65899	1.7488e-07	B2URK1_AKKM8	Putative glucose-6-phosphate 1-epimerase (EC 5.1.3.15)
	AMUC_RS06765	Amuc_1262	53.2339	204.675	3.84482	1.87885e-18	B2URK2_AKKM8	Pyridoxamine 5'-phosphate oxidase (EC 1.4.3.5)
	AMUC_RS06770	Amuc_1263	191.008	428.344	2.24255	3.7904e-14	B2URK3_AKKM8	Nicotinate-nucleotide pyrophosphorylase (EC 2.4.2.19)
	AMUC_RS06775	Amuc_1264	250.838	612.843	2.44318	1.9474e-18	B2URK4_AKKM8	Polyprenyl synthetase
	AMUC_RS06780	Amuc_1265	1074.53	1138.73	1.05974	0.441968	B2URK5_AKKM8	Aspartate-semialdehyde dehydrogenase (ASA dehydrogenase) (ASADH) (EC 1.2.1.11) (Aspartate-beta-semialdehyde dehydrogenase)
	AMUC_RS06785		119.245	35.8761	0.300862	5.74907e-12
	AMUC_RS06790		3.75507	1.63276	0.434814	0.336341	A0A1Y3SYX4_9BACT	Uncharacterized protein
	AMUC_RS06795	Amuc_1267	614.843	1023.2	1.66416	9.15e-09	B2URK7_AKKM8	Uncharacterized protein
	AMUC_RS06800	Amuc_1268	263.566	491.104	1.86331	1.22731e-09	B2URK8_AKKM8	L-serine dehydratase 1 (EC 4.3.1.17)
	AMUC_RS06805	Amuc_1269	917.717	867.452	0.945228	0.454108	B2URK9_AKKM8	Thioredoxin reductase (EC 1.8.1.9)
	AMUC_RS06810	Amuc_1270	84.1458	68.3844	0.812689	0.247214	B2URL0_AKKM8	Uncharacterized protein
	AMUC_RS06815	Amuc_1271	52.4967	118.436	2.25606	1.04527e-06	A0A1Y3T906_9BACT	N-acetyltransferase
	AMUC_RS06820	Amuc_1272	623.636	869.613	1.39443	8.37429e-06	B2URL2_AKKM8	Uncharacterized protein
	AMUC_RS06825	Amuc_1273	105.207	51.168	0.486355	1.69374e-05	A0A1Y3SYX6_9BACT	Uncharacterized protein
	AMUC_RS06830	Amuc_1274	94.8622	65.2449	0.687786	0.035118	B2URL4_AKKM8	Uncharacterized protein
	AMUC_RS06835	Amuc_1275	149.757	136.313	0.910227	0.559658	B2URL5_AKKM8	Uncharacterized protein
	AMUC_RS06840	Amuc_1276	144.11	54.8454	0.380579	3.60975e-09	B2URL6_AKKM8	Uncharacterized protein
	AMUC_RS06845	Amuc_1277	80.8186	15.9572	0.197445	2.13471e-12	B2URL7_AKKM8	TatD-related deoxyribonuclease
	AMUC_RS06850	Amuc_1278	32.4851	83.2915	2.56399	4.36712e-06	B2URL8_AKKM8	Sodium/hydrogen exchanger
	AMUC_RS06855	Amuc_1279	34.8775	128.78	3.69234	7.12284e-13	B2URL9_AKKM8	Metallophosphoesterase
	AMUC_RS06860	Amuc_1280	337.708	548.084	1.62295	2.80435e-07	B2URM0_AKKM8	Aminopeptidase
	AMUC_RS06865	Amuc_1281	127.183	399.027	3.13742	6.35517e-25	B2URM1_AKKM8	Phosphoribosylglycinamide formyltransferase (EC 2.1.2.2) (5'-phosphoribosylglycinamide transformylase) (GAR transformylase) (GART)
	AMUC_RS06870		2320.19	1767.92	0.761974	0.000143249	B2URM2_AKKM8	Peptidyl-prolyl cis-trans isomerase
	AMUC_RS06875	Amuc_1283	2268.23	5584.57	2.46208	1.31401e-54
	AMUC_RS06880	Amuc_1284	0	0.307103	#DIV/0!	0.968317	B2UMI6_AKKM8	Uncharacterized protein
	AMUC_RS06885	Amuc_1285	1322.18	1245.33	0.94188	0.397123	B2URM5_AKKM8	DNA gyrase subunit B (EC 5.99.1.3)
	AMUC_RS06890	Amuc_1286	488.546	634.819	1.2994	0.0046895	B2URM6_AKKM8	DNA topoisomerase (ATP-hydrolyzing) (EC 5.99.1.3)
	AMUC_RS06895	Amuc_1287	91.3525	91.5108	1.00173	0.995417	B2URM7_AKKM8	Uncharacterized protein
	AMUC_RS06900	Amuc_1288	996.643	138.393	0.13886	5.05877e-80	B2URM8_AKKM8	Peptidase U32
	AMUC_RS06905		700.801	179.902	0.256709	2.83172e-58	A0A1Y3T3G1_9BACT	Uncharacterized protein
	AMUC_RS06910	Amuc_1291	94.519	70.1697	0.742387	0.0696391	B2URN0_AKKM8	Putative surface layer protein, with cytochrome c domain
	AMUC_RS06915		66.2566	50.9162	0.76847	0.163752	B2URN1_AKKM8	Endoribonuclease L-PSP
	AMUC_RS06920	Amuc_1293	97.9512	5.81591	0.0593756	1.77911e-27	B2URN2_AKKM8	Uncharacterized protein
	AMUC_RS06925	Amuc_1294	221.51	230.496	1.04057	0.743414	B2URN3_AKKM8	Sulfite reductase (NADPH) (EC 1.8.1.2)
	AMUC_RS06930	Amuc_1295	59.5685	25.0095	0.419845	0.000218476	B2URN4_AKKM8	Binding-protein-dependent transport systems inner membrane component
	AMUC_RS06935	Amuc_1296	162.427	50.078	0.308311	2.36512e-16	B2URN5_AKKM8	ABC transporter related
	AMUC_RS06940	Amuc_1297	147.874	59.0452	0.399293	4.29269e-07	B2URN6_AKKM8	Putative substrate-binding protein of aliphatic sulfonate ABC transporter
	AMUC_RS06945		246.373	104.13	0.422654	2.45481e-10	B2URN7_AKKM8	Sulfate adenylyltransferase subunit 1 (EC 2.7.7.4) (ATP-sulfurylase large subunit) (Sulfate adenylate transferase) (SAT)
	AMUC_RS06950	Amuc_1299	192.266	91.5016	0.475912	1.03671e-07	CYSD_AKKM8	Sulfate adenylyltransferase subunit 2 (EC 2.7.7.4) (ATP-sulfurylase small subunit) (Sulfate adenylate transferase) (SAT)
	AMUC_RS06955	Amuc_1300	97.2306	23.3018	0.239655	5.01857e-12	B2URN9_AKKM8	Adenylylsulfate reductase, thioredoxin dependent (EC 1.8.4.8)
	AMUC_RS06960	Amuc_1301	548.044	88.1897	0.160917	1.62325e-64	B2URP0_AKKM8	Cysteine synthase A
	AMUC_RS06970	Amuc_1303	33.1735	21.7029	0.654225	0.122836	B2URP2_AKKM8	Phosphate import ATP-binding protein PstB (EC 3.6.3.27) (ABC phosphate transporter) (Phosphate-transporting ATPase)
	AMUC_RS06975	Amuc_1304	135.038	51.2017	0.379164	1.8191e-10	B2URP3_AKKM8	Phosphate transport system permease protein PstA
	AMUC_RS06980	Amuc_1305	272.188	92.1201	0.338443	3.79494e-20	B2URP4_AKKM8	Binding-protein-dependent transport systems inner membrane component
	AMUC_RS06985	Amuc_1306	188.845	59.2946	0.313985	5.17394e-15	B2URP5_AKKM8	Phosphate binding protein
	AMUC_RS06990	Amuc_1307	4.72741	6.64351	1.40532	0.573727	B2URP6_AKKM8	Phosphate import ATP-binding protein PstB (EC 3.6.3.27) (ABC phosphate transporter) (Phosphate-transporting ATPase)
	AMUC_RS06995	Amuc_1308	5.73851	5.32521	0.927978	0.971807	A0A1Y3SZ09_9BACT	Uncharacterized protein
	AMUC_RS07000	Amuc_1309	2342.65	1752.41	0.748048	0.00052418	B2URP8_AKKM8	Aldose 1-epimerase (EC 5.1.3.3)
	AMUC_RS07005		2225.09	693.01	0.311452	4.20446e-55	B2URP9_AKKM8	17 kDa surface antigen
	AMUC_RS07010	Amuc_1311	31553.4	15099.1	0.478526	1.02958e-29	B2URQ0_AKKM8	Uncharacterized protein
	AMUC_RS07015	Amuc_1312	608.529	1588.83	2.61093	1.96882e-41	B2URQ1_AKKM8	Peptidase M16 domain protein
	AMUC_RS07020	Amuc_1313	118.157	83.6588	0.70803	0.0244085	A0A1Y3T002_9BACT	Phosphohydrolase
	AMUC_RS07025	Amuc_1314	60.7933	69.0866	1.13642	0.494491	B2URQ3_AKKM8	Radical SAM domain protein
	AMUC_RS07030	Amuc_1315	86.7895	105.485	1.21541	0.248418	B2URQ4_AKKM8	Uncharacterized protein
	AMUC_RS07035	Amuc_1316	149.078	68.7839	0.461394	4.90996e-07	B2URQ5_AKKM8	Transcriptional regulator, MarR family
	AMUC_RS07040		179.224	306.697	1.71125	6.5277e-07
	AMUC_RS07045	Amuc_1317	490.138	1266.94	2.58486	4.03777e-37	B2URQ6_AKKM8	Uncharacterized protein
	AMUC_RS07050	Amuc_1318	331.534	1310.69	3.9534	9.00522e-68	RRF_AKKM8	Ribosome-recycling factor (RRF) (Ribosome-releasing factor)
	AMUC_RS07055	Amuc_1319	346.753	767.624	2.21375	5.18704e-20	B2UKM0_AKKM8	Uridylate kinase (UK) (EC 2.7.4.22) (Uridine monophosphate kinase) (UMP kinase) (UMPK)
	AMUC_RS07060	Amuc_1320	389.358	819.192	2.10395	4.89614e-19	B2UKM1_AKKM8	MscS Mechanosensitive ion channel
	AMUC_RS07065	Amuc_1321	4731.53	1721.35	0.363803	7.65541e-42	B2UKM2_AKKM8	Alkyl hydroperoxide reductase/ Thiol specific antioxidant/ Mal allergen
	AMUC_RS07070	Amuc_1322	26.8522	34.2928	1.27709	0.411561	A0A1Y3T3H3_9BACT	Uncharacterized protein
	AMUC_RS07075	Amuc_1323	258.395	457.645	1.77111	4.00577e-09	B2UKM4_AKKM8	Uncharacterized protein
	AMUC_RS07080	Amuc_1324	13.9992	101.695	7.26434	1.58873e-15	A0A1Y3T949_9BACT	Uncharacterized protein
	AMUC_RS07085	Amuc_1325	44.275	46.8091	1.05724	0.885932	B2UKM6_AKKM8	Recombination protein RecR
	AMUC_RS07090	Amuc_1326	66.5447	33.237	0.499468	0.000457545	B2UKM7_AKKM8	Uncharacterized protein
	AMUC_RS07095	Amuc_1327	2865.5	941.241	0.328473	2.34843e-27	B2UKM8_AKKM8	3-oxoacyl-[acyl-carrier-protein] synthase 2 (EC 2.3.1.179)
	AMUC_RS07100	Amuc_1329	2876.74	124.319	0.0432154	2.82497e-16	B2UKN0_AKKM8	Peptide-methionine (R)-S-oxide reductase (EC 1.8.4.12)
	AMUC_RS07105	Amuc_1330	71.7967	77.6798	1.08194	0.734213	DPO4_AKKM8	DNA polymerase IV (Pol IV) (EC 2.7.7.7)
	AMUC_RS07110	Amuc_1331	136.537	38.8053	0.284211	1.59284e-14	B2UKN2_AKKM8	Major facilitator superfamily MFS_1
	AMUC_RS07115	Amuc_1333	2866.48	2252.46	0.785794	0.000188257	B2UKN4_AKKM8	Uncharacterized protein
	AMUC_RS07120	Amuc_1334	119.899	33.4426	0.278924	2.95995e-14	B2UKN5_AKKM8	Uncharacterized protein
	AMUC_RS07125	Amuc_1335	524.505	39.0707	0.0744907	1.66578e-99	B2UKN6_AKKM8	Bacteriophage capsid protein-like protein
	AMUC_RS07130	Amuc_1336	105.572	42.469	0.402277	1.43162e-07	B2UKN7_AKKM8	Peptidase S49
	AMUC_RS07135	Amuc_1337	73.2568	17.8489	0.243649	1.84488e-10	B2UKN8_AKKM8	Uncharacterized protein
	AMUC_RS07140	Amuc_1338	264.052	49.7139	0.188273	9.9522e-33	B2UKN9_AKKM8	Uncharacterized protein
	AMUC_RS07145	Amuc_1339	8.689	2.72664	0.313804	0.0764725	B2UKP0_AKKM8	Uncharacterized protein
	AMUC_RS07150	Amuc_1340	31.6377	14.4217	0.455839	0.00948064
	AMUC_RS07155	Amuc_1341	55.2654	3.16827	0.0573284	1.22498e-15	B2UKP2_AKKM8	Uncharacterized protein
	AMUC_RS07160	Amuc_1342	634.552	116.533	0.183647	4.28529e-55
	AMUC_RS07165	Amuc_1343	1752.77	176.604	0.100757	9.36264e-120	B2UKP4_AKKM8	Uncharacterized protein
	AMUC_RS07170	Amuc_1344	51.9868	7.30678	0.140551	3.29978e-11	B2UKP5_AKKM8	Uncharacterized protein
	AMUC_RS07175	Amuc_1345	35.6393	16.212	0.45489	0.0075276	B2UKP6_AKKM8	Uncharacterized protein
	AMUC_RS07180	Amuc_1346	35.9233	12.9652	0.360913	0.00121252	B2UKP7_AKKM8	Uncharacterized protein
	AMUC_RS07185	Amuc_1348	144.778	120.592	0.832945	0.242529	B2UKP9_AKKM8	Phage tape measure protein
	AMUC_RS07190	Amuc_1349	42.9129	30.9525	0.721286	0.167525	B2UKQ0_AKKM8	Uncharacterized protein
	AMUC_RS07195	Amuc_1350	70.843	22.0166	0.31078	8.50137e-08	B2UKQ1_AKKM8	Uncharacterized protein
	AMUC_RS07200	Amuc_1351	44.9398	40.0554	0.891314	0.736488	B2UKQ2_AKKM8	Uncharacterized protein
	AMUC_RS07205	Amuc_1352	53.7878	37.4957	0.697104	0.148671	B2UKQ3_AKKM8	Uncharacterized protein
	AMUC_RS07210	Amuc_1353	13.4939	4.067	0.301395	0.0106461	B2UKQ4_AKKM8	Uncharacterized protein
	AMUC_RS07215	Amuc_1354	17.0518	11.4936	0.674041	0.342129	B2UKQ5_AKKM8	Uncharacterized protein
	AMUC_RS07220	Amuc_1355	55.5454	45.5284	0.819661	0.427358	B2UKQ6_AKKM8	Bacteriophage tail assembly protein-like protein
	AMUC_RS07230	Amuc_1357	16.9549	9.75941	0.575609	0.178225	B2UKQ8_AKKM8	Uncharacterized protein
	AMUC_RS07235	Amuc_1358	10.1385	5.19803	0.512702	0.185023
	AMUC_RS07240	Amuc_1359	9.83977	6.54626	0.665286	0.378645	B2UKR0_AKKM8	Uncharacterized protein
	AMUC_RS07245	Amuc_1360	126.687	58.1183	0.458757	2.14489e-07	B2UKR1_AKKM8	Uncharacterized protein
	AMUC_RS07265	Amuc_1363	97.4506	262.636	2.69507	3.33127e-16	B2UKR4_AKKM8	Uncharacterized protein
	AMUC_RS07270	Amuc_1365	2782.17	622.222	0.223646	1.7813e-60	B2UKR6_AKKM8	Uncharacterized protein
	AMUC_RS07275	Amuc_1367	82.0601	11.7664	0.143387	4.92035e-16	B2UKR8_AKKM8	Prophage antirepressor
	AMUC_RS07280	Amuc_1368	415.992	123.532	0.296958	1.63639e-28
	AMUC_RS07285		103.917	12.8413	0.123573	5.50283e-22
	AMUC_RS07290	Amuc_1369	31.1178	1.98488	0.063786	1.1167e-09
	AMUC_RS07295	Amuc_1370	19.0152	2.12346	0.111672	1.10699e-05	B2UKS1_AKKM8	Uncharacterized protein
	AMUC_RS07300		13.2339	6.65506	0.502878	0.121222	A0A1Y3SYS4_9BACT	Uncharacterized protein
	AMUC_RS07305		24.1236	8.5986	0.35644	0.00276466
	AMUC_RS07310	Amuc_1373	2.24341	1.43813	0.641046	0.750924	B2UKS4_AKKM8	Uncharacterized protein
	AMUC_RS07315	Amuc_1374	8.00129	5.10116	0.637542	0.533252	B2UKS5_AKKM8	Uncharacterized protein
	AMUC_RS07320	Amuc_1375	13.3736	4.26164	0.31866	0.0163957	B2UKS6_AKKM8	Uncharacterized protein
	AMUC_RS07335	Amuc_1378	2171.11	436.075	0.200853	2.86012e-122	B2UKS9_AKKM8	Integrase family protein
	AMUC_RS07345	Amuc_1379	70.5898	163.773	2.32006	9.66407e-06	B2UKT0_AKKM8	Transport permease protein
	AMUC_RS07350	Amuc_1380	97.2582	214.097	2.20133	1.05485e-09	B2UKT1_AKKM8	ABC-2 type transporter
	AMUC_RS07355	Amuc_1381	325.138	408.98	1.25787	0.0453255	B2UKT2_AKKM8	ABC transporter related
	AMUC_RS07360	Amuc_1382	1602.84	960.24	0.599088	3.73717e-11	B2UKT3_AKKM8	Secretion protein HlyD family protein
	AMUC_RS07365	Amuc_1383	325.803	619.077	1.90016	0.0168494	SYA_AKKM8	Alanine--tRNA ligase (EC 6.1.1.7) (Alanyl-tRNA synthetase) (AlaRS)
	AMUC_RS07370	Amuc_1384	310.517	150.2	0.483709	6.6975e-08	B2UKT5_AKKM8	CDP-diacylglycerol/serine O-phosphatidyltransferase
	AMUC_RS07375	Amuc_1385	383.975	182.299	0.474767	8.53753e-12	B2UKT6_AKKM8	Uncharacterized protein
	AMUC_RS07380	Amuc_1386	500.884	112.319	0.224242	1.09341e-50	B2UKT7_AKKM8	Dihydropteroate synthase (DHPS) (EC 2.5.1.15) (Dihydropteroate pyrophosphorylase)
	AMUC_RS07385	Amuc_1387	262.983	168.972	0.642519	0.00044798	B2UKT8_AKKM8	Uncharacterized protein
	AMUC_RS07390	Amuc_1388	211.355	128.551	0.608223	8.31899e-05	ISPG_AKKM8	4-hydroxy-3-methylbut-2-en-1-yl diphosphate synthase (flavodoxin) (EC 1.17.7.3) (1-hydroxy-2-methyl-2-(E)-butenyl 4-diphosphate synthase)
	AMUC_RS07395	Amuc_1389	36.4467	51.0917	1.40182	0.179739	B2UKU0_AKKM8	Short-chain dehydrogenase/reductase SDR
	AMUC_RS07400		6.85052	5.91735	0.863781	0.867349	A0A1Y3T3J3_9BACT	Uncharacterized protein
	AMUC_RS07405	Amuc_1390	33.5396	22.0238	0.656651	0.125923	B2UKU1_AKKM8	Uncharacterized protein
	AMUC_RS07410	Amuc_1391	52.9745	26.2263	0.495073	0.00167707	B2UKU2_AKKM8	Uncharacterized protein
	AMUC_RS07415	Amuc_1392	282.555	534.576	1.89194	2.61948e-07
	AMUC_RS07420	Amuc_1393	60.2441	414.275	6.87662	3.29033e-50	B2UKU4_AKKM8	8-amino-7-oxononanoate synthase (EC 2.3.1.47)
	AMUC_RS07425	Amuc_1394	232.361	399.01	1.7172	8.86036e-08	B2UKU5_AKKM8	Uncharacterized protein
	AMUC_RS07430		67.1855	118.092	1.7577	0.000600209	A0A1Y3SZP7_9BACT	Uncharacterized protein
	AMUC_RS07435		14.5478	63.0088	4.33116	3.37169e-08	A0A1Y3SZ47_9BACT	Uncharacterized protein
	AMUC_RS07440	Amuc_1395	16.7672	34.1912	2.03918	0.0221131
	AMUC_RS07445		9.83977	6.84549	0.695697	0.480789	A0A1Y3SZ46_9BACT	Uncharacterized protein
	AMUC_RS07450	Amuc_1396	42.7298	351.704	8.23089	1.8429e-48	B2UKU7_AKKM8	Aspartate--tRNA(Asp/Asn) ligase (EC 6.1.1.23) (Aspartyl-tRNA synthetase) (AspRS) (Non-discriminating aspartyl-tRNA synthetase) (ND-AspRS)
	AMUC_RS07455	Amuc_1397	130.538	158.603	1.215	0.135042	B2UKU8_AKKM8	Histidine--tRNA ligase (EC 6.1.1.21)
	AMUC_RS07460	Amuc_1398	3520.71	1572	0.446499	5.53326e-34	B2UKU9_AKKM8	Hydrogenase accessory protein HypB
	AMUC_RS07465	Amuc_1399	1666.59	1568.88	0.941377	0.462365	B2UKV0_AKKM8	Carbamoyltransferase (EC 6.2.-.-)
	AMUC_RS07470	Amuc_1400	104.353	150.775	1.44486	0.0161436	B2UKV1_AKKM8	Hydrogenase assembly chaperone hypC/hupF
	AMUC_RS07475	Amuc_1401	279.773	653.998	2.3376	5.04248e-16	B2UKV2_AKKM8	Hydrogenase expression/formation protein HypD
	AMUC_RS07480	Amuc_1402	680.376	360.348	0.529631	9.91961e-11	B2UKV3_AKKM8	Hydrogenase expression/formation protein HypE
	AMUC_RS07485	Amuc_1404	26.1885	30.8696	1.17874	0.567594
	AMUC_RS07490		2.44526	4.711	1.92659	0.489008
	AMUC_RS07495		8.84867	1.56898	0.177313	0.0166962
	AMUC_RS07510	Amuc_1406	19101.3	5978.76	0.313003	4.46866e-97	DNAK_AKKM8	Chaperone protein DnaK (HSP70) (Heat shock 70 kDa protein) (Heat shock protein 70)
	AMUC_RS07515	Amuc_1407	3198.54	2569.12	0.803215	0.00615133	B2UKV7_AKKM8	10 kDa chaperonin (GroES protein) (Protein Cpn10)
	AMUC_RS07520	Amuc_1408	7261.14	4653.74	0.64091	4.77498e-07
	AMUC_RS07525	Amuc_1409	36182.1	4875.1	0.134738	7.84495e-110	B2UKV9_AKKM8	Uncharacterized protein
	AMUC_RS07530	Amuc_1410	2008.96	130.029	0.0647246	1.25466e-273	B2UKW0_AKKM8	Phosphate transporter
	AMUC_RS07545	Amuc_1411	1881.51	1970.49	1.04729	0.50817	B2UKW1_AKKM8	Uncharacterized protein
	AMUC_RS07550	Amuc_1412	1332.43	1866.15	1.40056	3.36121e-06	B2UKW2_AKKM8	Uncharacterized protein
	AMUC_RS07555	Amuc_1413	224.645	1573.06	7.00242	2.87027e-106	B2UKW3_AKKM8	Capsular exopolysaccharide family (EC 2.7.10.2)
	AMUC_RS07560	Amuc_1414	84.2802	121.349	1.43983	0.0214443	B2UKW4_AKKM8	Polysaccharide export protein
	AMUC_RS07565	Amuc_1415	9.13206	3.20174	0.350604	0.0687762	B2UKW5_AKKM8	Uncharacterized protein
	AMUC_RS07570	Amuc_1416	414.943	119.416	0.28779	4.70304e-27	A0A1Y3T4K1_9BACT	Holliday junction ATP-dependent DNA helicase RuvA (EC 3.6.4.12)
	AMUC_RS07575	Amuc_1417	4065.33	8373.38	2.05971	5.42751e-37	B2UKW7_AKKM8	Glyceraldehyde-3-phosphate dehydrogenase (EC 1.2.1.-)
	AMUC_RS07580	Amuc_1418	392.634	1175.35	2.99351	3.74466e-41	PGK_AKKM8	Phosphoglycerate kinase (EC 2.7.2.3)
	AMUC_RS07585		8.86743	5.91278	0.666798	0.460296
	AMUC_RS07590	Amuc_1419	141.159	253.788	1.79789	9.42071e-07
	AMUC_RS07595	Amuc_1420	817.311	115.983	0.141908	1.24819e-100
	AMUC_RS07600		2.04094	4.75969	2.33211	0.375091
	AMUC_RS07610		314.421	636.281	2.02366	1.04341e-16
	AMUC_RS07615	Amuc_1423	564.919	418.742	0.741243	0.000609359
	AMUC_RS07625	Amuc_1425	230.464	122.671	0.532277	6.97641e-08
	AMUC_RS07630	Amuc_1426	1810.66	3734.44	2.06248	1.46092e-19	B2UKX5_AKKM8	Uncharacterized protein
	AMUC_RS07635	Amuc_1427	162.532	119.385	0.734531	0.0253712	B2UKX6_AKKM8	Histidinol phosphate phosphatase HisJ family (EC 3.1.3.15)
	AMUC_RS07640	Amuc_1428	3463.82	733.549	0.211775	5.19234e-131	B2UKX7_AKKM8	Phosphate acetyltransferase (EC 2.3.1.8)
	AMUC_RS07650	Amuc_1430	59.1755	49.7418	0.840582	0.445016	A0A1Y3T6Q2_9BACT	50S ribosomal protein L31
	AMUC_RS07655	Amuc_1431	210.336	231.629	1.10123	0.38894	B2UKY0_AKKM8	Uncharacterized protein
	AMUC_RS07670	Amuc_1432	71.9516	132.613	1.84309	5.24339e-05	B2UKY1_AKKM8	Putative lipoprotein
	AMUC_RS07675	Amuc_1433	40.2464	9.73278	0.24183	7.09795e-06	B2UKY2_AKKM8	Uncharacterized protein
	AMUC_RS07680	Amuc_1434	556.154	1731.54	3.11343	6.91843e-55
	AMUC_RS07685	Amuc_1435	1116.76	462.219	0.413892	8.65084e-30	B2UKY4_AKKM8	UDP-glucose 6-dehydrogenase (EC 1.1.1.22)
	AMUC_RS07690	Amuc_1436	4421.92	2255.98	0.51018	4.04088e-25	MDH_AKKM8	Malate dehydrogenase (EC 1.1.1.37)
	AMUC_RS07695	Amuc_1437	2825.04	1070.15	0.378808	2.92508e-50	B2UKY6_AKKM8	Uncharacterized protein
	AMUC_RS07700	Amuc_1438	818.858	825.054	1.00757	0.950434
	AMUC_RS07705	Amuc_1439	316.687	489	1.54411	7.71329e-07	B2UKY8_AKKM8	Organic solvent tolerance protein OstA-like protein
	AMUC_RS07710		5.89756	3.65111	0.619088	0.520763
	AMUC_RS07715	Amuc_1440	417.046	290.25	0.695966	4.8336e-05	B2UKY9_AKKM8	Nitroreductase
	AMUC_RS07720	Amuc_1441	99.8585	177.22	1.77471	2.34184e-05	B2UKZ0_AKKM8	Pseudouridine synthase
	AMUC_RS07725	Amuc_1442	81.8243	225.154	2.75167	2.82646e-14	B2UKZ1_AKKM8	Pseudouridine synthase (EC 5.4.99.-)
	AMUC_RS07730	Amuc_1443	2280.21	2487.8	1.09104	0.184434	B2UKZ2_AKKM8	Uncharacterized protein
	AMUC_RS07735		155.976	161.054	1.03256	0.742831
	AMUC_RS07740	Amuc_1444	136.758	122.414	0.89511	0.520647	B2UKZ3_AKKM8	Uncharacterized protein
	AMUC_RS07745	Amuc_1445	246.675	48.9786	0.198555	1.58343e-23
	AMUC_RS07760	Amuc_1447	266.717	299.509	1.12295	0.359472	ARGC_AKKM8	N-acetyl-gamma-glutamyl-phosphate reductase (AGPR) (EC 1.2.1.38) (N-acetyl-glutamate semialdehyde dehydrogenase) (NAGSA dehydrogenase)
	AMUC_RS07765	Amuc_1448	795.127	953.33	1.19897	0.0439088	B2UKZ7_AKKM8	Arginine biosynthesis bifunctional protein ArgJ [Cleaved into: Arginine biosynthesis bifunctional protein ArgJ alpha chain; Arginine biosynthesis bifunctional protein ArgJ beta chain] [Includes: Amino-acid acetyltransferase (EC 2.3.1.1) (N-acetylglutamate synthase) (AGSase); Glutamate N-acetyltransferase (EC 2.3.1.35) (Ornithine transacetylase) (Ornithine acetyltransferase) (OATase)]
	AMUC_RS07770	Amuc_1449	67.0613	64.8566	0.967123	0.949576	B2UKZ8_AKKM8	Uncharacterized protein
	AMUC_RS07775	Amuc_1450	749.282	476.961	0.636558	1.24288e-08	A0A1Y3SZ93_9BACT	Uncharacterized protein
	AMUC_RS07780	Amuc_1451	287.13	114.59	0.399085	1.15309e-14	B2UL00_AKKM8	Uncharacterized protein
	AMUC_RS07785	Amuc_1452	797.368	250.649	0.314346	1.05607e-28	B2UL01_AKKM8	Excinuclease ABC, A subunit
	AMUC_RS07790	Amuc_1453	1350.73	346.445	0.256488	4.90763e-75
	AMUC_RS07800	Amuc_1455	105.212	217.216	2.06456	8.55648e-09	A0A1Y3T3P8_9BACT	Uncharacterized protein
	AMUC_RS07805	Amuc_1456	43.2264	623.541	14.425	3.74182e-66	A0A1Y3T5W8_9BACT	Uncharacterized protein
	AMUC_RS07810	Amuc_1457	45.7384	140.709	3.07638	9.57064e-10	B2UL06_AKKM8	Phosphoribosylformimino-5-aminoimidazole carboxamide ribotide isomerase (EC 5.3.1.16)
	AMUC_RS07815	Amuc_1458	20.5223	50.7373	2.47231	0.0011032
	AMUC_RS07820	Amuc_1459	712.137	1578.57	2.21666	1.13974e-32	B2UL08_AKKM8	Protein GrpE (HSP-70 cofactor)
	AMUC_RS07825	Amuc_1460	992.34	2176.11	2.19291	8.67686e-16	B2UL09_AKKM8	Chaperone protein DnaJ
	AMUC_RS07830	Amuc_1461	225.779	494.25	2.18908	6.99535e-08	B2UL10_AKKM8	Ribosomal RNA small subunit methyltransferase E (EC 2.1.1.193)
	AMUC_RS07840	Amuc_1463	162.177	163.866	1.01042	0.94061	A0A1Y3SZA4_9BACT	Uncharacterized protein
	AMUC_RS07845	Amuc_1464	119.889	192.015	1.60161	0.000318387	B2UL13_AKKM8	Squalene/phytoene synthase
	AMUC_RS07850	Amuc_1465	467.752	401.676	0.858737	0.0803718
	AMUC_RS07855	Amuc_1466	340.831	464.986	1.36427	0.00241648	B2UL15_AKKM8	FAD linked oxidase domain protein
	AMUC_RS07860	Amuc_1467	614.525	197.144	0.320807	2.86299e-21	B2UL16_AKKM8	Uncharacterized protein
	AMUC_RS07865	Amuc_1468	35.0232	28.5144	0.814158	0.43666	B2UL17_AKKM8	Uncharacterized protein
	AMUC_RS07870	Amuc_1469	53.3401	71.3944	1.33848	0.10968	B2UL18_AKKM8	Uncharacterized protein
	AMUC_RS07875	Amuc_1470	144.316	42.8399	0.296847	2.4399e-14	A0A1Y3SZW1_9BACT	Exosortase
	AMUC_RS07880	Amuc_1471	234.576	976.285	4.16192	6.09587e-64	B2UL20_AKKM8	Ribose-phosphate pyrophosphokinase (RPPK) (EC 2.7.6.1) (5-phospho-D-ribosyl alpha-1-diphosphate) (Phosphoribosyl diphosphate synthase) (Phosphoribosyl pyrophosphate synthase) (P-Rib-PP synthase) (PRPP synthase) (PRPPase)
	AMUC_RS07885	Amuc_1472	359.249	1295.16	3.60519	4.28769e-65	RL25_AKKM8	50S ribosomal protein L25 (General stress protein CTC)
	AMUC_RS07890	Amuc_1473	443.039	642.24	1.44962	8.94082e-05	B2UL22_AKKM8	Uncharacterized protein
	AMUC_RS07895		6.85052	1.81268	0.264605	0.0790724	A0A1Y3SZB4_9BACT	Uncharacterized protein
	AMUC_RS07900	Amuc_1474	945.152	365.299	0.386498	2.4543e-34	HIS7_AKKM8	Imidazoleglycerol-phosphate dehydratase (IGPD) (EC 4.2.1.19)
	AMUC_RS07905	Amuc_1475	452.982	176.943	0.390617	4.02167e-21	B2UL24_AKKM8	Imidazole glycerol phosphate synthase subunit HisH (EC 2.4.2.-) (IGP synthase glutamine amidotransferase subunit) (IGP synthase subunit HisH) (ImGP synthase subunit HisH) (IGPS subunit HisH)
	AMUC_RS07910	Amuc_1476	1623.97	1234.66	0.760273	0.000138928	RS6_AKKM8	30S ribosomal protein S6
	AMUC_RS07915	Amuc_1477	302.595	311.663	1.02997	0.860896	B2UL26_AKKM8	4-hydroxythreonine-4-phosphate dehydrogenase (EC 1.1.1.262)
	AMUC_RS07920	Amuc_1478	182.27	130.705	0.717095	0.00881564	B2UL27_AKKM8	Uncharacterized protein
	AMUC_RS07925	Amuc_1479	335.457	86.8999	0.259049	4.16946e-31	B2UL28_AKKM8	Uncharacterized protein
	AMUC_RS07930	Amuc_1480	407.782	260.851	0.639683	2.21057e-05
	AMUC_RS07935	Amuc_1481	2235.52	736.112	0.32928	1.59398e-64	B2UL30_AKKM8	ATP-dependent 6-phosphofructokinase (ATP-PFK) (Phosphofructokinase) (EC 2.7.1.11) (Phosphohexokinase)
	AMUC_RS07945	Amuc_1483	46.6908	168.596	3.61091	6.73531e-15	ZUPT_AKKM8	Zinc transporter ZupT
	AMUC_RS07950	Amuc_1484	79.4705	542.638	6.82817	2.0849e-60
	AMUC_RS07960	Amuc_1486	244.783	523.035	2.13672	3.44636e-16	B2UL35_AKKM8	Uncharacterized protein
	AMUC_RS07965	Amuc_1487	784.33	435.345	0.555053	1.23293e-14	B2UL36_AKKM8	Aminotransferase class I and II
	AMUC_RS07970	Amuc_1488	151.17	136.355	0.901998	0.403365	B2UL37_AKKM8	Uncharacterized protein
	AMUC_RS07975	Amuc_1489	52.4146	52.3479	0.998728	0.964698	B2UL38_AKKM8	Guanylate kinase (EC 2.7.4.8)
	AMUC_RS07980	Amuc_1490	123.564	138.145	1.11801	0.488053	B2UL39_AKKM8	TrkA-C domain protein
	AMUC_RS07985	Amuc_1491	315.817	132.786	0.420452	1.57816e-16	B2UL40_AKKM8	Glutamyl-tRNA synthetase class Ic
	AMUC_RS07990	Amuc_1492	28.2783	69.593	2.46101	6.65881e-05	B2UL41_AKKM8	Uncharacterized protein
	AMUC_RS07995	Amuc_1493	55.4732	101.269	1.82555	0.000575859	B2UL42_AKKM8	Uncharacterized protein
	AMUC_RS08000	Amuc_1494	257.595	252.728	0.981108	0.813025
	AMUC_RS08005	Amuc_1495	498.452	289.618	0.581035	6.81464e-10	B2UL44_AKKM8	3-dehydroquinate dehydratase (EC 4.2.1.10)
	AMUC_RS08010		3.17233	3.10855	0.979894	0.946663	A0A1Y3T3T4_9BACT	Uncharacterized protein
	AMUC_RS08015	Amuc_1496	18.1204	13.5832	0.74961	0.399263	B2UL45_AKKM8	Uncharacterized protein
	AMUC_RS08020	Amuc_1497	202.579	156.155	0.770834	0.0289581	B2UL46_AKKM8	Uncharacterized protein
	AMUC_RS08025	Amuc_1498	435.036	474.054	1.08969	0.393391
	AMUC_RS08030	Amuc_1499	300.072	510.919	1.70266	2.83429e-08	B2UL48_AKKM8	Putative sigma E regulatory protein, MucB/RseB
	AMUC_RS08035		190.175	791.927	4.16421	2.87753e-41	B2UL49_AKKM8	Polysaccharide deacetylase
	AMUC_RS08040	Amuc_1501	239.85	819.55	3.41692	5.78205e-46
	AMUC_RS08045		24974.1	34135.8	1.36685	2.93947e-08	A0A1Y3T1H8_9BACT	Uncharacterized protein
	AMUC_RS08055	Amuc_1504	685.274	222.355	0.324476	4.90223e-41
	AMUC_RS08060	Amuc_1505	759.301	3469.33	4.56911	1.5656e-95	B2UL53_AKKM8	DNA-directed RNA polymerase subunit alpha (RNAP subunit alpha) (EC 2.7.7.6) (RNA polymerase subunit alpha) (Transcriptase subunit alpha)
	AMUC_RS08065	Amuc_1506	360.099	524.056	1.45531	0.000157591	RL17_AKKM8	50S ribosomal protein L17
	AMUC_RS08070	Amuc_1507	1474.51	1766.42	1.19797	0.00664738	B2UL55_AKKM8	Malonyl CoA-acyl carrier protein transacylase (EC 2.3.1.39)
	AMUC_RS08075		43.8699	19.5561	0.445775	0.00147063
	AMUC_RS08080	Amuc_1509	20.5891	65.6006	3.18618	3.15976e-06
	AMUC_RS08085	Amuc_1510	87.2406	256.187	2.93655	1.54374e-17
	AMUC_RS08090	Amuc_1511	980.269	186.94	0.190703	9.90159e-85	B2ULE5_AKKM8	Uncharacterized protein
	AMUC_RS08095	Amuc_1512	318.797	501.636	1.57353	5.94665e-07	B2ULE6_AKKM8	OmpA/MotB domain protein
	AMUC_RS08100	Amuc_1513	91.954	160.224	1.74243	0.000245963
	AMUC_RS08105	Amuc_1514	508.692	498.561	0.980084	0.876392
	AMUC_RS08110	Amuc_1515	774.145	412.899	0.533362	1.37379e-15	B2ULE9_AKKM8	Major facilitator superfamily MFS_1
	AMUC_RS08115	Amuc_1516	1803.77	521.79	0.289278	1.52563e-61	B2ULF0_AKKM8	Putative PAS/PAC sensor protein
	AMUC_RS08120	Amuc_1517	1659.25	309.662	0.186628	1.6835e-88	B2ULF1_AKKM8	RNA polymerase, sigma-24 subunit, ECF subfamily
	AMUC_RS08125	Amuc_1518	809.124	544.555	0.673019	6.24188e-07	B2ULF2_AKKM8	Endonuclease/exonuclease/phosphatase
	AMUC_RS08130	Amuc_1519	502.399	1255.79	2.49958	2.06608e-27	B2ULF3_AKKM8	Helicase domain protein
	AMUC_RS08135	Amuc_1520	529.911	610.526	1.15213	0.103472	B2ULF4_AKKM8	Uncharacterized protein
	AMUC_RS08140	Amuc_1521	1074.18	3912.08	3.64191	7.51972e-76	B2ULF5_AKKM8	DNA methylase N-4/N-6 domain protein
	AMUC_RS08145	Amuc_1522	456.7	1487.88	3.2579	8.99344e-52	B2ULF6_AKKM8	Type III restriction protein res subunit
	AMUC_RS08150	Amuc_1524	142.723	209.749	1.46963	0.000903113
	AMUC_RS08155	Amuc_1525	178.203	303.64	1.7039	8.81149e-06	B2ULF9_AKKM8	Uncharacterized protein
	AMUC_RS08160	Amuc_1526	69.2552	232.462	3.35661	2.30049e-19	B2ULG0_AKKM8	Lipoate-protein ligase A-like protein
	AMUC_RS08165	Amuc_1527	15.4967	56.1826	3.62545	8.59865e-07	B2ULG1_AKKM8	Aldo/keto reductase
	AMUC_RS08170	Amuc_1528	791.472	167.046	0.211057	4.53822e-67
	AMUC_RS08175	Amuc_1529	699.273	104.838	0.149925	7.15044e-63
	AMUC_RS08180	Amuc_1530	83.0525	203.106	2.44551	3.52532e-10	B2ULG4_AKKM8	Uncharacterized protein
	AMUC_RS08185		11.7223	26.6898	2.27685	0.013814
	AMUC_RS08190	Amuc_1531	600.512	460.401	0.766681	0.00195439
	AMUC_RS08195	Amuc_1532	306.964	443.192	1.44379	0.000807339	B2ULG6_AKKM8	Anthranilate phosphoribosyltransferase (EC 2.4.2.18)
	AMUC_RS08200	Amuc_1533	172.535	277.007	1.60552	0.00078982	B2ULG7_AKKM8	Indole-3-glycerol phosphate synthase (EC 4.1.1.48)
	AMUC_RS08205	Amuc_1534	66.7132	197.981	2.96764	5.81801e-08	B2ULG8_AKKM8	N-(5'-phosphoribosyl)anthranilate isomerase (PRAI) (EC 5.3.1.24)
	AMUC_RS08210	Amuc_1535	180.888	357.391	1.97576	5.92242e-10	B2ULG9_AKKM8	Tryptophan synthase beta chain (EC 4.2.1.20)
	AMUC_RS08215	Amuc_1536	382.358	361.418	0.945233	0.88395
	AMUC_RS08220		1.5357	11.8232	7.69884	0.00492316
	AMUC_RS08225	Amuc_1537	918.896	1251.34	1.36179	9.81562e-05
	AMUC_RS08230	Amuc_1538	2819.53	362.209	0.128464	1.41051e-201	B2ULH2_AKKM8	OsmC family protein
	AMUC_RS08235	Amuc_1539	334.411	215.966	0.645812	2.47676e-05	B2ULH3_AKKM8	Homoserine O-acetyltransferase (HAT) (EC 2.3.1.31) (Homoserine transacetylase) (HTA)
	AMUC_RS08245	Amuc_1541	110.91	109.316	0.985627	0.932708	A0A1Y3T1L9_9BACT	Uncharacterized protein
	AMUC_RS08250	Amuc_1542	28.3832	112.099	3.94949	2.15219e-11	B2ULH6_AKKM8	Pyruvate formate-lyase-activating enzyme (EC 1.97.1.4)
	AMUC_RS08255	Amuc_1543	609.886	1426.64	2.33919	2.23195e-34	B2ULH7_AKKM8	Formate acetyltransferase (EC 2.3.1.54)
	AMUC_RS08260	Amuc_1544	171.223	165.929	0.969079	0.889814
	AMUC_RS08265		145.419	103.7	0.713114	0.0327081	B2ULI0_AKKM8	Lipolytic protein G-D-S-L family
	AMUC_RS08270	Amuc_1547	156.722	154.44	0.985438	0.991754	B2ULI1_AKKM8	Uncharacterized protein
	AMUC_RS08275	Amuc_1548	77.0674	56.571	0.734045	0.0998809	A0A1Y3SZL5_9BACT	Uncharacterized protein
	AMUC_RS08280		5.33419	7.34775	1.37748	0.549218	A0A1Y3SZJ9_9BACT	Uncharacterized protein
	AMUC_RS08285	Amuc_1549	339.051	254.156	0.749608	0.00896543
	AMUC_RS08290	Amuc_1550	11.197	25.2521	2.25524	0.024901	A0A1Y3SZI6_9BACT	Uncharacterized protein
	AMUC_RS08295	Amuc_1551	1810.4	1322.46	0.730483	8.5534e-06	B2ULI5_AKKM8	NADH-quinone oxidoreductase subunit A (EC 1.6.5.11) (NADH dehydrogenase I subunit A) (NDH-1 subunit A) (NUO1)
	AMUC_RS08300	Amuc_1552	139.381	140.239	1.00615	0.934564
	AMUC_RS08310	Amuc_1553	16.3047	15.7738	0.967435	0.845618	B2ULI7_AKKM8	Uncharacterized protein
	AMUC_RS08315	Amuc_1554	31.335	17.0884	0.545346	0.0297694	B2ULI8_AKKM8	Uncharacterized protein
	AMUC_RS08320	Amuc_1555	400.01	896.263	2.2406	1.86809e-25	B2ULI9_AKKM8	UvrABC system protein B (Protein UvrB) (Excinuclease ABC subunit B)
	AMUC_RS08325	Amuc_1556	659.374	321.894	0.488181	3.51325e-14	B2ULJ0_AKKM8	50S ribosomal protein L35
	AMUC_RS08330	Amuc_1557	2073.43	1010.57	0.487391	6.96785e-27	RL20_AKKM8	50S ribosomal protein L20
	AMUC_RS08335	Amuc_1558	373.16	770.315	2.0643	3.98572e-19	B2ULJ2_AKKM8	Zinc metalloprotease (EC 3.4.24.-)
	AMUC_RS08340	Amuc_1559	83.684	164.967	1.9713	8.96835e-07	A0A1Y3T049_9BACT	Uncharacterized protein
	AMUC_RS08345	Amuc_1560	2233.65	1280.2	0.573143	1.54304e-16
	AMUC_RS08350	Amuc_1561	160.608	209.7	1.30566	0.0193947	B2ULJ5_AKKM8	UvrD/REP helicase
	AMUC_RS08355	Amuc_1562	364.77	315.226	0.864176	0.118779	B2ULJ6_AKKM8	ATP-dependent nuclease subunit B-like protein
	AMUC_RS08360		5.97911	18.3694	3.07227	0.0128422	A0A1Y3T438_9BACT	Uncharacterized protein
	AMUC_RS08365	Amuc_1563	56.8733	118.702	2.08712	1.07243e-05	B2ULJ7_AKKM8	Uncharacterized protein
	AMUC_RS08370	Amuc_1564	56.1709	155.094	2.76111	3.16959e-10	B2ULJ8_AKKM8	Type II site-specific deoxyribonuclease (EC 3.1.21.4)
	AMUC_RS08375	Amuc_1565	1793.6	1000.73	0.557946	7.19207e-20	B2ULJ9_AKKM8	Alpha-2-macroglobulin domain protein
	AMUC_RS08380	Amuc_1566	195.032	363.822	1.86544	2.35471e-10	B2ULK0_AKKM8	Iron-containing alcohol dehydrogenase
	AMUC_RS08390	Amuc_1567	414.394	663.202	1.60042	1.14035e-06	B2ULK1_AKKM8	Methylated-DNA--protein-cysteine methyltransferase (EC 2.1.1.63) (6-O-methylguanine-DNA methyltransferase) (MGMT) (O-6-methylguanine-DNA-alkyltransferase)
	AMUC_RS08395	Amuc_1568	3729.44	259.459	0.0695707	0	A0A1Y3SZL9_9BACT	Uncharacterized protein
	AMUC_RS08400	Amuc_1569	99244.1	6209.88	0.0625718	0	B2ULK3_AKKM8	Uncharacterized protein
	AMUC_RS08405	Amuc_1570	499.439	175.199	0.350791	2.34286e-21	A0A1Y3SZK4_9BACT	Uncharacterized protein
	AMUC_RS08410	Amuc_1571	262.524	88.2776	0.336265	1.28064e-15	A0A1Y3T1P7_9BACT	tRNA (Adenosine(37)-N6)-threonylcarbamoyltransferase complex dimerization subunit type 1 TsaB
	AMUC_RS08415	Amuc_1572	1429.46	708.851	0.495888	2.10885e-25	B2ULK6_AKKM8	Citrate synthase
	AMUC_RS08420	Amuc_1574	276.587	95.2873	0.344511	1.26417e-20	B2ULK7_AKKM8	Putative tRNA (cytidine(34)-2'-O)-methyltransferase (EC 2.1.1.207) (tRNA (cytidine/uridine-2'-O-)-methyltransferase)
	AMUC_RS08425	Amuc_1575	205.715	108.124	0.525603	9.20995e-07	B2ULK8_AKKM8	DEAD/DEAH box helicase domain protein
	AMUC_RS08430	Amuc_1576	330.997	274.385	0.828965	0.0707831	B2ULK9_AKKM8	SsrA-binding protein (Small protein B)
	AMUC_RS08435	Amuc_1577	1525.12	344.862	0.226121	4.64622e-83	B2ULL0_AKKM8	DNA-directed RNA polymerase, omega subunit
	AMUC_RS08440	Amuc_1578	68.5909	20.0169	0.29183	8.16638e-09	B2ULL1_AKKM8	Pseudouridine synthase (EC 5.4.99.-)
	AMUC_RS08445	Amuc_1579	156.828	146.881	0.936575	0.67781	A0A1Y3SZM8_9BACT	Uncharacterized protein
	AMUC_RS08450	Amuc_1580	443.029	597.013	1.34757	0.000448247	B2ULL3_AKKM8	Nucleoside-diphosphate kinase (EC 2.7.4.6)
	AMUC_RS08455	Amuc_1581	138.64	162.835	1.17451	0.212837	B2ULL4_AKKM8	Glycosyl transferase family 2
	AMUC_RS08460	Amuc_1582	767.418	361.324	0.47083	4.24629e-16	B2ULL5_AKKM8	Glycosyl transferase family 2
	AMUC_RS08470	Amuc_1584	272.007	537.623	1.9765	3.08105e-14	B2ULL7_AKKM8	Type II secretion system protein
	AMUC_RS08475	Amuc_1585	335.098	536.761	1.6018	1.36184e-07	B2ULL8_AKKM8	Type II secretion system protein E
	AMUC_RS08480	Amuc_1586	1360.29	771.896	0.567447	2.46121e-14	B2ULL9_AKKM8	Type II secretion system protein E
	AMUC_RS08485	Amuc_1587	537.885	119.721	0.222578	3.36037e-37	B2ULM0_AKKM8	tRNA-dihydrouridine synthase (EC 1.3.1.-)
	AMUC_RS08490	Amuc_1588	573.188	934.25	1.62992	9.47993e-08	B2ULM1_AKKM8	Uncharacterized protein
	AMUC_RS08495	Amuc_1589	1621.87	1800.79	1.11032	0.108078	B2ULM2_AKKM8	Aminotransferase (EC 2.6.1.-)
	AMUC_RS08500		842.895	190.574	0.226095	9.99264e-74	B2ULM3_AKKM8	Probable lipid II flippase MurJ
	AMUC_RS08505	Amuc_1591	1693.79	333.926	0.197148	2.08035e-79	B2ULM4_AKKM8	Cytidyltransferase-related domain protein
	AMUC_RS08510	Amuc_1592	23700	4308.05	0.181774	5.64422e-209	B2ULM5_AKKM8	Superoxide dismutase (EC 1.15.1.1)
	AMUC_RS08515	Amuc_1593	99.0458	198.917	2.00833	5.3065e-07	B2ULM6_AKKM8	Uncharacterized protein
	AMUC_RS08520	Amuc_1594	138.528	140.993	1.0178	0.986139	B2ULM7_AKKM8	NCAIR mutase (PurE)-related protein-like protein
	AMUC_RS08525	Amuc_1595	98.2038	252.612	2.57233	2.4984e-10	B2ULM8_AKKM8	ExsB family protein
	AMUC_RS08530	Amuc_1596	330.62	394.544	1.19335	0.132908	A0A1Y3T434_9BACT	Pyridinium-3,5-bisthiocarboxylic acid mononucleotide nickel insertion protein (P2TMN nickel insertion protein) (Nickel-pincer cofactor biosynthesis protein LarC)
	AMUC_RS08535	Amuc_1597	862.745	446.661	0.517721	5.57989e-16	B2ULN0_AKKM8	Polyprenyl synthetase
	AMUC_RS08540	Amuc_1598	30.811	37.7796	1.22617	0.382502
	AMUC_RS08545	Amuc_1599	529.218	1214.49	2.29488	1.10776e-28
	AMUC_RS08550	Amuc_1600	329.589	855.863	2.59676	6.25708e-32	B2ULN3_AKKM8	FeS assembly SUF system protein SufT
	AMUC_RS08555	Amuc_1601	175.977	599.831	3.40857	2.70764e-31	B2ULN4_AKKM8	Uncharacterized protein
	AMUC_RS08560		76.5248	138.901	1.81512	7.60622e-05	B2ULN6_AKKM8	Uncharacterized protein
	AMUC_RS08565	Amuc_1604	50.8889	286.01	5.62028	1.10958e-29	B2ULN7_AKKM8	NADH-quinone oxidoreductase subunit N (EC 1.6.5.11) (NADH dehydrogenase I subunit N) (NDH-1 subunit N)
	AMUC_RS08570	Amuc_1605	41.9206	290.426	6.92802	1.85948e-35	B2ULN8_AKKM8	Proton-translocating NADH-quinone oxidoreductase, chain M (EC 1.6.99.5)
	AMUC_RS08575	Amuc_1606	71.544	402.072	5.61993	2.64164e-36	B2ULN9_AKKM8	Proton-translocating NADH-quinone oxidoreductase, chain L (EC 1.6.99.5)
	AMUC_RS08580	Amuc_1607	12.3238	135.989	11.0347	4.00584e-22	NUOK_AKKM8	NADH-quinone oxidoreductase subunit K (EC 1.6.5.11) (NADH dehydrogenase I subunit K) (NDH-1 subunit K)
	AMUC_RS08590	Amuc_1609	34.6857	303.771	8.7578	1.87182e-43	B2ULY5_AKKM8	NADH-quinone oxidoreductase subunit I (EC 1.6.5.11) (NADH dehydrogenase I subunit I) (NDH-1 subunit I)
	AMUC_RS08595	Amuc_1610	79.0041	287.136	3.63444	1.46679e-20	B2ULY6_AKKM8	NADH-quinone oxidoreductase subunit H (EC 1.6.5.11) (NADH dehydrogenase I subunit H) (NDH-1 subunit H)
	AMUC_RS08600	Amuc_1611	130.553	695.973	5.33098	2.70345e-55	A0A1Y3SZQ9_9BACT	NADH-quinone oxidoreductase subunit L
	AMUC_RS08605	Amuc_1612	179.279	1158.35	6.46114	8.21992e-98	B2ULY8_AKKM8	NADH dehydrogenase (Quinone) (EC 1.6.99.5)
	AMUC_RS08610	Amuc_1613	102.655	359.551	3.50252	1.29422e-28	B2ULY9_AKKM8	NADH dehydrogenase (Ubiquinone) 24 kDa subunit
	AMUC_RS08615	Amuc_1614	446.806	1055.93	2.36329	9.49267e-28	NUOD_AKKM8	NADH-quinone oxidoreductase subunit D (EC 1.6.5.11) (NADH dehydrogenase I subunit D) (NDH-1 subunit D)
	AMUC_RS08620	Amuc_1615	22.0439	9.75941	0.442727	0.0248779	B2ULZ1_AKKM8	Uncharacterized protein
	AMUC_RS08625	Amuc_1616	180.246	606.549	3.36512	4.72439e-35	B2ULZ2_AKKM8	Polysaccharide deacetylase
	AMUC_RS08630	Amuc_1617	570.842	453.991	0.7953	0.019136
	AMUC_RS08635	Amuc_1618	58.5687	202.646	3.45997	2.31388e-17	B2ULZ4_AKKM8	Riboflavin synthase, alpha subunit
	AMUC_RS08640		48.6361	57.9311	1.19111	0.400276	A0A1Y3T9V2_9BACT	Uncharacterized protein
	AMUC_RS08645	Amuc_1619	254.105	242.511	0.954373	0.781426	B2ULZ5_AKKM8	Ribosomal L11 methyltransferase
	AMUC_RS08650	Amuc_1620	170.862	140.695	0.823443	0.189746	B2ULZ6_AKKM8	Outer membrane autotransporter barrel domain protein
	AMUC_RS08655	Amuc_1621	173.073	149.75	0.865246	0.243214	B2ULZ7_AKKM8	4-alpha-glucanotransferase (EC 2.4.1.25)
	AMUC_RS08660		7.51481	3.71121	0.493852	0.275713	A0A1Y3T1U5_9BACT	Uncharacterized protein
	AMUC_RS08665	Amuc_1622	631.716	484.428	0.766845	0.00613749	B2ULZ8_AKKM8	Uncharacterized protein
	AMUC_RS08670	Amuc_1623	172.705	528.634	3.06091	3.59819e-29	RIMO_AKKM8	Ribosomal protein S12 methylthiotransferase RimO (S12 MTTase) (S12 methylthiotransferase) (EC 2.8.4.4) (Ribosomal protein S12 (aspartate-C(3))-methylthiotransferase) (Ribosome maturation factor RimO)
	AMUC_RS08675	Amuc_1624	179.283	294.313	1.64161	6.88804e-05	B2UM00_AKKM8	Uncharacterized protein
	AMUC_RS08685	Amuc_1626	601.93	1679.52	2.79023	2.84434e-46	B2UM02_AKKM8	RNA polymerase sigma factor SigA
	AMUC_RS08690	Amuc_1627	99.3325	177.077	1.78267	3.04435e-05
	AMUC_RS08695	Amuc_1628	91.2168	99.3473	1.08913	0.573027	B2UM04_AKKM8	Uncharacterized protein
	AMUC_RS08700	Amuc_1629	177.019	41.4496	0.234153	2.99976e-21	B2UM05_AKKM8	Uncharacterized protein
	AMUC_RS08705		259.453	689.995	2.65943	1.208e-27
	AMUC_RS08710	Amuc_1631	908.239	1804.2	1.98648	5.57879e-21	B2UM07_AKKM8	Carboxyl-terminal protease (EC 3.4.21.102)
	AMUC_RS08715		31.5809	9.71439	0.307604	0.000463317	A0A1Y3SZS5_9BACT	Uncharacterized protein
	AMUC_RS08720	Amuc_1632	178.895	115.548	0.645898	0.000480438	A0A1Y3T4A8_9BACT	Phosphatidate cytidylyltransferase
	AMUC_RS08725	Amuc_1633	46.6058	99.5307	2.13559	3.75042e-05	B2UM09_AKKM8	Helicase ATP-dependent domain protein
	AMUC_RS08730	Amuc_1634	320.682	180.896	0.564098	6.02791e-08
	AMUC_RS08735	Amuc_1635	2565.33	1230.36	0.47961	4.7084e-32	B2UM11_AKKM8	Uncharacterized protein
	AMUC_RS08740	Amuc_1636	333.09	245.002	0.735541	0.00266443	B2UM12_AKKM8	Polynucleotide adenylyltransferase/metal dependent phosphohydrolase (EC 2.7.7.72)
	AMUC_RS08745	Amuc_1637	275.908	267.841	0.970763	0.780738
	AMUC_RS08750	Amuc_1638	472.742	752.994	1.59282	8.23774e-09
	AMUC_RS08755	Amuc_1639	204.395	401.527	1.96446	8.05498e-12	A0A1Y3SZS6_9BACT	Uncharacterized protein
	AMUC_RS08760	Amuc_1640	31.9411	114.71	3.59129	1.81735e-11	B2UM16_AKKM8	Uncharacterized protein
	AMUC_RS08765	Amuc_1641	61.6248	197.624	3.2069	1.37284e-15	FOLD_AKKM8	Bifunctional protein FolD [Includes: Methylenetetrahydrofolate dehydrogenase (EC 1.5.1.5); Methenyltetrahydrofolate cyclohydrolase (EC 3.5.4.9)]
	AMUC_RS08770	Amuc_1642	2212.36	565.29	0.255515	3.1976e-82	B2UM18_AKKM8	Enoyl-[acyl-carrier-protein] reductase [NADH] (EC 1.3.1.9)
	AMUC_RS08775		89.2194	46.9429	0.526152	0.000283646	B2UM19_AKKM8	Diacylglycerol kinase catalytic region
	AMUC_RS08785	Amuc_1645	114.17	58.9294	0.516153	7.5824e-05
	AMUC_RS08790	Amuc_1646	397.663	400.243	1.00649	0.885831	B2UM22_AKKM8	4-hydroxy-3-methylbut-2-enyl diphosphate reductase (HMBPP reductase) (EC 1.17.7.4)
	AMUC_RS08795		39.6009	24.8932	0.628603	0.0701474	A0A1Y3SZU7_9BACT	Uncharacterized protein
	AMUC_RS08800	Amuc_1648	699.295	450.98	0.644906	2.08974e-07	RS20_AKKM8	30S ribosomal protein S20
	AMUC_RS08805	Amuc_1649	940.285	278.498	0.296185	2.62865e-55	B2UM24_AKKM8	Beta-phosphoglucomutase family hydrolase
	AMUC_RS08810	Amuc_1650	602.858	884.913	1.46786	1.55962e-06
	AMUC_RS08815	Amuc_1651	148.085	90.0207	0.607897	0.000814875	B2UM26_AKKM8	Basic Secretory Protein
	AMUC_RS08820	Amuc_1652	80.8806	118.807	1.46892	0.0174772	B2UM27_AKKM8	Phosphatidylserine decarboxylase-related
	AMUC_RS08825	Amuc_1653	27.9842	102.898	3.67699	4.25218e-11	B2UM28_AKKM8	Ribulose-phosphate 3-epimerase (EC 5.1.3.1)
	AMUC_RS08830	Amuc_1654	171.929	1279.38	7.44136	1.50135e-107	B2UM29_AKKM8	Leucine--tRNA ligase (EC 6.1.1.4) (Leucyl-tRNA synthetase) (LeuRS)
	AMUC_RS08835	Amuc_1655	2192.51	208.336	0.0950215	5.35725e-216
	AMUC_RS08840	Amuc_1656	473.159	360.668	0.762257	0.00940436	A0A1Y3T498_9BACT	Uncharacterized protein
	AMUC_RS08845	Amuc_1657	83.1716	121.642	1.46254	0.028557	B2UM32_AKKM8	Carboxynorspermidine decarboxylase
	AMUC_RS08850	Amuc_1658	294.375	291.932	0.991702	0.957922	B2UM33_AKKM8	Biosynthetic arginine decarboxylase (ADC) (EC 4.1.1.19)
	AMUC_RS08855	Amuc_1659	162.957	63.4715	0.3895	1.25929e-09	B2UM34_AKKM8	Integrase family protein
	AMUC_RS08860		550.509	57.9089	0.105192	1.13891e-97
	AMUC_RS08865	Amuc_1661	3362.74	11618.7	3.45514	1.62015e-34	B2UM35_AKKM8	Uncharacterized protein
	AMUC_RS08870	Amuc_1663	236.101	85.1645	0.360712	9.42498e-16	B2UM37_AKKM8	Uncharacterized protein
	AMUC_RS08875		140.875	57.9053	0.411041	9.43043e-09
	AMUC_RS08880	Amuc_1665	421.98	111.809	0.264964	1.34649e-30
	AMUC_RS08885		194.632	17.3431	0.0891071	6.37417e-40
	AMUC_RS08890	Amuc_1666	403.864	55.1371	0.136524	1.74337e-61	B2UM40_AKKM8	Beta-galactosidase (EC 3.2.1.23) (Lactase)
	AMUC_RS08895	Amuc_1667	85.8527	65.678	0.765008	0.14372
	AMUC_RS08900	Amuc_1668	290.071	97.3817	0.335717	2.16473e-20	B2UM42_AKKM8	AAA ATPase central domain protein
	AMUC_RS08905	Amuc_1669	263.374	83.4021	0.316667	8.267e-19	B2UM43_AKKM8	Beta-N-acetylhexosaminidase (EC 3.2.1.52)
	AMUC_RS08910	Amuc_1670	401.453	65.5521	0.163287	1.05127e-48	A0A1Y3T1Z0_9BACT	Uncharacterized protein
	AMUC_RS08915		3.19171	4.46782	1.39982	0.736488	A0A1Y3SZV2_9BACT	Uncharacterized protein
	AMUC_RS08920		13.9029	6.95061	0.49994	0.127284	A0A1Y3T4D9_9BACT	Uncharacterized protein
	AMUC_RS08925	Amuc_1671	170.987	170.551	0.997452	0.972991	B2UM45_AKKM8	Pyrophosphate--fructose 6-phosphate 1-phosphotransferase (EC 2.7.1.90) (6-phosphofructokinase, pyrophosphate dependent) (PPi-dependent phosphofructokinase) (PPi-PFK) (Pyrophosphate-dependent 6-phosphofructose-1-kinase)
	AMUC_RS08930	Amuc_1672	40.8707	54.4148	1.33139	0.232522	B2UM46_AKKM8	Uncharacterized protein
	AMUC_RS08935	Amuc_1673	215.993	299.954	1.38872	0.0014842
	AMUC_RS08945	Amuc_1675	18.1973	18.6797	1.02651	0.999182	B2UM49_AKKM8	Integrase family protein
	AMUC_RS08950		1136.63	177.658	0.156302	1.12522e-83
	AMUC_RS08955	Amuc_1677	170.794	113.814	0.666381	0.00230353	B2UM51_AKKM8	Type III restriction protein res subunit
	AMUC_RS08960	Amuc_1678	5.23265	11.4074	2.18004	0.17565
	AMUC_RS08965	Amuc_1679	5.13173	32.1513	6.26521	9.6575e-06
	AMUC_RS08970	Amuc_1680	4.2028	8.62141	2.05135	0.210534	B2UM54_AKKM8	Adenosylcobinamide-GDP ribazoletransferase (EC 2.7.8.26) (Cobalamin synthase) (Cobalamin-5'-phosphate synthase)
	AMUC_RS08975	Amuc_1681	13.8601	28.8923	2.08457	0.01738	B2UM55_AKKM8	Nicotinate-nucleotide--dimethylbenzimidazole phosphoribosyltransferase (NN:DBI PRT) (EC 2.4.2.21) (N(1)-alpha-phosphoribosyltransferase)
	AMUC_RS08980	Amuc_1682	14.5438	35.8289	2.46353	0.00395968	B2UM56_AKKM8	Cobalamin biosynthesis protein CobD
	AMUC_RS08985	Amuc_1683	80.9581	122.152	1.50883	0.00940218	B2UM57_AKKM8	Cobyric acid synthase
	AMUC_RS08990		28.456	16.834	0.591582	0.131107
	AMUC_RS08995	Amuc_1684	823.732	6439.22	7.81713	1.70398e-206	B2UM58_AKKM8	TonB-dependent receptor
	AMUC_RS09000	Amuc_1685	253.942	237.963	0.937075	0.633648
	AMUC_RS09005	Amuc_1686	829.926	306.789	0.369659	8.71571e-36	B2UM60_AKKM8	Beta-galactosidase (EC 3.2.1.23)
	AMUC_RS09010	Amuc_1687	1752.5	497.665	0.283974	4.62627e-80	B2UM61_AKKM8	Uncharacterized protein
	AMUC_RS09015	Amuc_1688	493.42	148.208	0.300369	6.87473e-28
	AMUC_RS09020	Amuc_1689	2390.33	1317.47	0.551165	1.36253e-11	B2UM63_AKKM8	Dihydrolipoyl dehydrogenase (EC 1.8.1.4)
	AMUC_RS09025	Amuc_1690	152.987	248.083	1.62159	0.00034972	B2UM64_AKKM8	Nucleotidyltransferase substrate binding protein, HI0074 family
	AMUC_RS09030	Amuc_1691	109.496	198.388	1.81182	3.81004e-06
	AMUC_RS09035	Amuc_1692	69.298	142.93	2.06254	2.00538e-06	B2UM66_AKKM8	2-oxoglutarate dehydrogenase, E2 subunit, dihydrolipoamide succinyltransferase
	AMUC_RS09040	Amuc_1693	378.453	883.088	2.33341	2.16647e-20	B2UM67_AKKM8	2-oxoglutarate dehydrogenase, E1 subunit (EC 1.2.4.2)
	AMUC_RS09045	Amuc_1694	590.893	315.705	0.534285	1.81445e-14	B2UM68_AKKM8	Cytochrome d ubiquinol oxidase, subunit II (EC 3.1.3.1)
	AMUC_RS09050	Amuc_1695	8050.28	738.402	0.0917238	0	B2UM69_AKKM8	Cytochrome bd ubiquinol oxidase subunit I
	AMUC_RS09055	Amuc_1696	5.45449	18.5379	3.39865	0.00615133	B2UM70_AKKM8	ErfK/YbiS/YcfS/YnhG family protein
	AMUC_RS09060	Amuc_1697	10.5475	39.5403	3.74879	3.98004e-05	B2UM71_AKKM8	Protein tyrosine phosphatase
	AMUC_RS09065	Amuc_1698	85.7289	146.202	1.7054	0.000243126	B2UM72_AKKM8	Uncharacterized protein
	AMUC_RS09070	Amuc_1699	40.7357	55.0996	1.35261	0.174109	B2UM73_AKKM8	Aminoglycoside phosphotransferase
	AMUC_RS09075	Amuc_1700	319.654	241.589	0.755783	0.00466782	B2UM74_AKKM8	Tryptophan synthase beta chain (EC 4.2.1.20)
	AMUC_RS09080	Amuc_1701	422.388	143.11	0.338813	3.34322e-29	B2UM75_AKKM8	Transcriptional regulator, MarR family
	AMUC_RS09085	Amuc_1703	1937.48	1918.99	0.990456	0.934819
	AMUC_RS09090	Amuc_1704	302.222	764.626	2.53001	1.45174e-25	B2UMG6_AKKM8	Uncharacterized protein
	AMUC_RS09095	Amuc_1705	615.205	461.011	0.749361	0.00100532
	AMUC_RS09105	Amuc_1706	61.7297	112.409	1.82098	0.000312293
	AMUC_RS09110		19.9835	3.11958	0.156107	4.30897e-05	A0A1Y3T6M4_9BACT	Uncharacterized protein
	AMUC_RS09115	Amuc_1707	150.224	20.1069	0.133846	1.11572e-29	A0A1Y3TA33_9BACT	Nucleotide pyrophosphatase
	AMUC_RS09120	Amuc_1708	46.3886	18.2904	0.394286	0.000311411	B2UMH0_AKKM8	Uncharacterized protein
	AMUC_RS09125	Amuc_1709	94.8423	70.6229	0.744636	0.0989553	B2UMH1_AKKM8	Uncharacterized protein
	AMUC_RS09135	Amuc_1710	441.464	261.671	0.592733	6.60183e-08	B2UMH2_AKKM8	ATP-dependent DNA helicase, RecQ family
	AMUC_RS09150	Amuc_1712	219.098	223.823	1.02157	0.888342	B2UMH4_AKKM8	Succinate--CoA ligase [ADP-forming] subunit alpha (EC 6.2.1.5)
	AMUC_RS09155	Amuc_1713	277.195	759.154	2.7387	1.13956e-33	SUCC_AKKM8	Succinate--CoA ligase [ADP-forming] subunit beta (EC 6.2.1.5) (Succinyl-CoA synthetase subunit beta) (SCS-beta)
	AMUC_RS09160	Amuc_1714	72.7744	240.736	3.30798	1.69878e-18	B2UMH6_AKKM8	Histidinol dehydrogenase (HDH) (EC 1.1.1.23)
	AMUC_RS09165	Amuc_1715	43.1963	59.7659	1.38359	0.131195	B2UMH7_AKKM8	Na+-dependent transporter-like protein
	AMUC_RS09170	Amuc_1716	150.459	158.414	1.05287	0.690429	B2UMH8_AKKM8	Tetratricopeptide TPR_2 repeat protein
	AMUC_RS09175	Amuc_1717	188.262	525.816	2.793	5.37706e-24	B2UMH9_AKKM8	Uncharacterized protein
	AMUC_RS09180		41.4781	50.2692	1.21194	0.365846
	AMUC_RS09185		4.72741	2.64764	0.56006	0.497431
	AMUC_RS09190	Amuc_1719	39.1766	79.3408	2.02521	0.000301923	B2UMI1_AKKM8	Exodeoxyribonuclease 7 large subunit (EC 3.1.11.6) (Exodeoxyribonuclease VII large subunit) (Exonuclease VII large subunit)
	AMUC_RS09195	Amuc_1720	397.999	278.218	0.699043	0.000123788
	AMUC_RS09200	Amuc_1721	2.06032	2.70736	1.31405	0.843655	B2UMI3_AKKM8	Uncharacterized protein
	AMUC_RS09205	Amuc_1722	1163.54	562.98	0.483851	3.75035e-15
	AMUC_RS09210	Amuc_1723	1252.84	395.83	0.315945	3.36277e-55
	AMUC_RS09215	Amuc_1724	0	0	#DIV/0!	NA
	AMUC_RS09220	Amuc_1725	479.069	184.896	0.385949	1.91749e-23	B2UMI7_AKKM8	Acyl-ACP thioesterase
	AMUC_RS09225	Amuc_1726	264.36	285.135	1.07859	0.462538	B2UMI8_AKKM8	NAD-dependent epimerase/dehydratase
	AMUC_RS09230	Amuc_1727	174.062	309.703	1.77927	4.35623e-06	B2UMI9_AKKM8	Integral membrane sensor signal transduction histidine kinase
	AMUC_RS09235	Amuc_1728	354.816	273.416	0.770584	0.469119	B2UMJ0_AKKM8	Two component transcriptional regulator, winged helix family
	AMUC_RS09240	Amuc_1729	332.174	129.154	0.388814	5.3641e-17	A0A1Y3STV1_9BACT	Uncharacterized protein
	AMUC_RS09245	Amuc_1730	74.0789	159.344	2.15101	1.07417e-06	A0A1Y3STV6_9BACT	Delta-aminolevulinic acid dehydratase (EC 4.2.1.24)
	AMUC_RS09250	Amuc_1731	241.184	492.097	2.04034	6.17845e-14	B2UMJ3_AKKM8	Uncharacterized protein
	AMUC_RS09255		80.7769	25.5339	0.316105	2.01021e-07	A0A1Y3T3T5_9BACT	Uncharacterized protein
	AMUC_RS09260	Amuc_1732	189.954	407.903	2.14738	1.79005e-06	B2UMJ4_AKKM8	Threonine--tRNA ligase (EC 6.1.1.3) (Threonyl-tRNA synthetase) (ThrRS)
	AMUC_RS09265	Amuc_1733	549.475	674.759	1.22801	0.0701474	B2UMJ5_AKKM8	Translation initiation factor IF-3
	AMUC_RS09275	Amuc_1736	17.7736	33.2377	1.87006	0.0671939	B2UMJ8_AKKM8	Uncharacterized protein
	AMUC_RS09280	Amuc_1737	71.4558	116.118	1.62504	0.00595101	B2UMJ9_AKKM8	1-deoxy-D-xylulose 5-phosphate reductoisomerase (DXP reductoisomerase) (EC 1.1.1.267) (1-deoxyxylulose-5-phosphate reductoisomerase) (2-C-methyl-D-erythritol 4-phosphate synthase)
	AMUC_RS09285	Amuc_1738	706.699	224.568	0.31777	6.41262e-42
	AMUC_RS09290	Amuc_1739	70.1307	100.424	1.43196	0.0301296	B2UMK1_AKKM8	Peptide chain release factor
	AMUC_RS09295	Amuc_1740	56.1142	101.516	1.8091	0.238157	B2UMK2_AKKM8	Uncharacterized protein
	AMUC_RS09300	Amuc_1741	270.787	397.306	1.46723	0.000596439	B2UMK3_AKKM8	UTP--glucose-1-phosphate uridylyltransferase (EC 2.7.7.9)
	AMUC_RS09305	Amuc_1742	1291.8	121.785	0.0942752	8.17657e-114	B2UMK4_AKKM8	Methyltransferase type 11
	AMUC_RS09310	Amuc_1743	1359.44	160.648	0.118172	1.34875e-142	B2UMK5_AKKM8	Uncharacterized protein
	AMUC_RS09315	Amuc_1744	150.256	65.0433	0.432883	2.79637e-08
	AMUC_RS09320	Amuc_1746	603.358	452.442	0.749873	0.00211927
	AMUC_RS09325	Amuc_1747	446.542	383.685	0.859237	0.122636	B2UMK9_AKKM8	Cytidyltransferase-related domain protein
	AMUC_RS09335	Amuc_1749	77.2043	31.7159	0.410805	2.39047e-05
	AMUC_RS09340		2.76802	1.13102	0.408604	0.414117	A0A1Y3SUB5_9BACT	Uncharacterized protein
	AMUC_RS09350	Amuc_1751	5031.69	1047.69	0.208219	1.44983e-105	B2UML3_AKKM8	1,4-alpha-glucan branching enzyme (EC 2.4.1.18)
	AMUC_RS09355	Amuc_1752	28.2636	76.1482	2.69422	6.13439e-06	A0A1Y3STQ6_9BACT	Uncharacterized protein
	AMUC_RS09360	Amuc_1753	140.138	334.345	2.38582	1.81351e-15	B2UML5_AKKM8	Fe-S metabolism associated SufE
	AMUC_RS09365	Amuc_1754	179.598	477.719	2.65994	1.29977e-23	OTC_AKKM8	Ornithine carbamoyltransferase (OTCase) (EC 2.1.3.3)
	AMUC_RS09370	Amuc_1755	1886.9	722.047	0.382664	7.28275e-44	B2UML7_AKKM8	Sulfatase
	AMUC_RS09375	Amuc_1756	1635.44	1185.9	0.725125	6.33643e-07	B2UML8_AKKM8	Phosphoenolpyruvate-protein phosphotransferase (EC 2.7.3.9) (Phosphotransferase system, enzyme I)
	AMUC_RS09380	Amuc_1757	1063.47	95.5093	0.0898094	7.6064e-148	B2UML9_AKKM8	Phosphotransferase system, phosphocarrier protein HPr
	AMUC_RS09385	Amuc_1758	106.791	39.4984	0.369868	1.56806e-06	B2UMM0_AKKM8	HPr kinase/phosphorylase (HPrK/P) (EC 2.7.11.-) (EC 2.7.4.-) (HPr(Ser) kinase/phosphorylase)
	AMUC_RS09390	Amuc_1759	993.754	1511.04	1.52054	2.50514e-09
	AMUC_RS09395	Amuc_1760	83.3612	276.884	3.3215	1.06633e-21	B2UMM2_AKKM8	ABC transporter related
	AMUC_RS09400	Amuc_1761	65.4387	361.224	5.52004	8.344e-31	B2UMM3_AKKM8	5-formyltetrahydrofolate cyclo-ligase (EC 6.3.3.2)
	AMUC_RS09405	Amuc_1762	516.222	437.461	0.847429	0.0673477	B2UMM4_AKKM8	Miro domain protein
	AMUC_RS09410	Amuc_1763	264.62	292.874	1.10678	0.351658	B2UMM5_AKKM8	Pyridoxal phosphate homeostasis protein (PLP homeostasis protein)
	AMUC_RS09415	Amuc_1764	1584.89	498.177	0.314329	9.03352e-65	B2UMM6_AKKM8	Uncharacterized protein
	AMUC_RS09425	Amuc_1766	613.638	1156.87	1.88526	8.60488e-19	B2UMM8_AKKM8	Glycosyl transferase family 2
	AMUC_RS09430	Amuc_1767	618.639	884.518	1.42978	1.39402e-06	A0A1Y3SY58_9BACT	Uncharacterized protein
	AMUC_RS09440	Amuc_1769	3783.92	1028.35	0.271769	4.02005e-87	B2UMN1_AKKM8	Non-specific serine/threonine protein kinase (EC 2.7.11.1)
	AMUC_RS09445	Amuc_1770	1889.06	825.135	0.436797	1.69003e-26	B2UMN2_AKKM8	Transcriptional regulator, AsnC family
	AMUC_RS09450	Amuc_1771	765.54	608.026	0.794245	0.00824611
	AMUC_RS09455	Amuc_1772	279.559	248.281	0.888116	0.257454
	AMUC_RS09460	Amuc_1773	53.9656	58.4809	1.08367	0.683818	B2UMN5_AKKM8	Uncharacterized protein
	AMUC_RS09465	Amuc_1774	652.941	1059.42	1.62254	1.24288e-08	B2UMN6_AKKM8	Glycyl-tRNA synthetase
	AMUC_RS09470	Amuc_1775	5541.15	629.968	0.113689	3.95477e-252	B2UMN7_AKKM8	Aldo/keto reductase
	AMUC_RS09475	Amuc_1776	323.601	1040.95	3.21676	4.58076e-44	B2UMN8_AKKM8	TPR repeat-containing protein
	AMUC_RS09485	Amuc_1778	1183.6	428.727	0.362224	3.9945e-38	B2UMP0_AKKM8	von Willebrand factor type A
	AMUC_RS09490	Amuc_1779	203.272	460.506	2.26546	4.8198e-16	B2UMP1_AKKM8	Uncharacterized protein
	AMUC_RS09495	Amuc_1780	938.349	724.685	0.772298	0.000411593	B2UMP2_AKKM8	Uncharacterized protein
	AMUC_RS09500	Amuc_1781	5566.14	2171.57	0.390139	3.74381e-49	B2UMP3_AKKM8	ATPase associated with various cellular activities AAA_3
	AMUC_RS09505	Amuc_1782	92.5408	293.557	3.17219	1.77267e-17	GATA_AKKM8	Glutamyl-tRNA(Gln) amidotransferase subunit A (Glu-ADT subunit A) (EC 6.3.5.7)
	AMUC_RS09510	Amuc_1783	128.102	183.522	1.43262	0.00633342	GATC_AKKM8	Aspartyl/glutamyl-tRNA(Asn/Gln) amidotransferase subunit C (Asp/Glu-ADT subunit C) (EC 6.3.5.-)
	AMUC_RS09515	Amuc_1784	158.249	199.01	1.25757	0.126835	B2UMP6_AKKM8	Uncharacterized protein
	AMUC_RS09520	Amuc_1785	907.065	817.681	0.901458	0.178126	B2UMP7_AKKM8	Uncharacterized protein
	AMUC_RS09525		12.0016	4.82347	0.401901	0.0690019	A0A1Y3T0F0_9BACT	Uncharacterized protein
	AMUC_RS09530	Amuc_1786	645.599	318.489	0.493323	1.05045e-17	A0A1Y3SXZ1_9BACT	Uncharacterized protein
	AMUC_RS09535	Amuc_1787	143.142	156.754	1.0951	0.520763	B2UMP9_AKKM8	Uncharacterized protein
	AMUC_RS09540	Amuc_1788	725.281	459.661	0.633769	1.72844e-08	B2UMQ0_AKKM8	Uncharacterized protein
	AMUC_RS09545	Amuc_1789	145.736	136.217	0.934686	0.627826	A0A1Y3SVV1_9BACT	Uncharacterized protein
	AMUC_RS09550	Amuc_1790	156.733	130.495	0.832594	0.167525	B2UMQ2_AKKM8	PDZ/DHR/GLGF domain protein
	AMUC_RS09555	Amuc_1791	332.715	143.176	0.430327	2.13196e-13	B2UMQ3_AKKM8	Peptidase S1 and S6 chymotrypsin/Hap
	AMUC_RS09565	Amuc_1793	587.314	43.6001	0.0742364	2.33441e-98	B2UMQ5_AKKM8	Acyltransferase 3
	AMUC_RS09570		69.0955	10.4705	0.151536	1.45405e-13	A0A1Y3STK1_9BACT	Uncharacterized protein
	AMUC_RS09575	Amuc_1794	410.643	98.2502	0.23926	1.24149e-40
	AMUC_RS09580		0.828002	2.35576	2.84511	0.462365	A0A1Y3T0E0_9BACT	Uncharacterized protein
	AMUC_RS09585	Amuc_1796	6.92741	1.51661	0.218929	0.0481564	B2UMQ8_AKKM8	Uncharacterized protein
	AMUC_RS09590	Amuc_1797	1234.39	682.184	0.552649	2.72985e-17	B2UN04_AKKM8	Uncharacterized protein
	AMUC_RS09595	Amuc_1798	517.15	472.184	0.913051	0.333845	B2UN05_AKKM8	Aminotransferase class I and II
	AMUC_RS09600	Amuc_1799	324.32	427.113	1.31695	0.00228472	B2UN06_AKKM8	Uncharacterized Fe-S center protein, putative ferredoxin
	AMUC_RS09605	Amuc_1800	432.596	390.213	0.902027	0.344221	B2UN07_AKKM8	2,5-didehydrogluconate reductase (EC 1.1.1.274)
	AMUC_RS09610	Amuc_1801	306.257	624.027	2.0376	7.45714e-14	B2UN08_AKKM8	Peptidase S15
	AMUC_RS09615	Amuc_1802	194.033	353.598	1.82236	1.04927e-08	B2UN09_AKKM8	Aldo/keto reductase
	AMUC_RS09620	Amuc_1803	160.252	487.511	3.04215	1.64488e-21
	AMUC_RS09625	Amuc_1804	401.497	341.158	0.849716	0.0998022	B2UN11_AKKM8	Uncharacterized protein
	AMUC_RS09630	Amuc_1805	115.14	239.619	2.08111	1.73838e-07
	AMUC_RS09635	Amuc_1806	170.889	760.755	4.45175	9.97745e-46
	AMUC_RS09640	Amuc_1807	339.689	748.784	2.20433	1.37683e-17	B2UN14_AKKM8	Aldo/keto reductase
	AMUC_RS09645	Amuc_1808	229.608	328.497	1.43069	0.000852193	A0A1Y3SY22_9BACT	Amidohydrolase
	AMUC_RS09650	Amuc_1809	121.372	296.731	2.4448	5.28084e-13	B2UN16_AKKM8	NAD(P)H dehydrogenase (Quinone)
	AMUC_RS09655	Amuc_1810	272.166	100.662	0.369855	1.97724e-17	B2UN17_AKKM8	Transcriptional regulator, MerR family
	AMUC_RS09660	Amuc_1811	170.013	141.148	0.83022	0.232768	A0A1Y3SVT7_9BACT	Uncharacterized protein
	AMUC_RS09665	Amuc_1812	2829.52	599.921	0.212022	7.5772e-76	B2UN19_AKKM8	Alpha amylase catalytic region
	AMUC_RS09670		6.68681	2.00364	0.299641	0.0896497
	AMUC_RS09675	Amuc_1813	110.546	96.3313	0.871416	0.340265	B2UN20_AKKM8	MATE efflux family protein
	AMUC_RS09680	Amuc_1814	7.75541	17.2342	2.22222	0.0906588	A0A1Y3STM4_9BACT	Uncharacterized protein
	AMUC_RS09685	Amuc_1815	252.353	134.844	0.534347	1.46698e-07
	AMUC_RS09690	Amuc_1816	545.687	399.196	0.731548	0.000254258	B2UN23_AKKM8	Uncharacterized protein
	AMUC_RS09695	Amuc_1817	52.0878	63.5293	1.21966	0.3179	A0A1Y3T0C0_9BACT	dTDP-4-dehydrorhamnose reductase (EC 1.1.1.133)
	AMUC_RS09700	Amuc_1818	62.7228	208.443	3.32324	1.60428e-15	B2UN25_AKKM8	PUA domain containing protein
	AMUC_RS09705	Amuc_1819	68.2388	58.0144	0.850167	0.371558
	AMUC_RS09710	Amuc_1820	325.999	135.178	0.414658	3.33184e-14	B2UN27_AKKM8	KH domain protein
	AMUC_RS09715		1.23232	2.6853	2.17907	0.524692	A0A1Y3SVS7_9BACT	Uncharacterized protein
	AMUC_RS09720	Amuc_1821	68.3075	109.275	1.59975	0.00306623	B2UN28_AKKM8	Putative SAM-dependent methyltransferase
	AMUC_RS09725	Amuc_1822	3448.22	2373.54	0.688336	1.27959e-10	B2UN29_AKKM8	Glucosamine-6-phosphate deaminase (EC 3.5.99.6) (GlcN6P deaminase) (GNPDA) (Glucosamine-6-phosphate isomerase)
	AMUC_RS09730	Amuc_1823	1054.48	56.2238	0.0533189	1.03876e-189	B2UN30_AKKM8	Uncharacterized protein
	AMUC_RS09735	Amuc_1824	3477.75	562.705	0.161801	4.72362e-114	B2UN31_AKKM8	Uncharacterized protein
	AMUC_RS09740		115.109	68.8372	0.598016	0.000938769	A0A1Y3T3I7_9BACT	Uncharacterized protein
	AMUC_RS09745	Amuc_1825	134.08	58.02	0.432725	5.40005e-08	B2UN32_AKKM8	Hemolysin A
	AMUC_RS09750	Amuc_1826	164.3	176.326	1.07319	0.565599
	AMUC_RS09755	Amuc_1827	6337.78	764.808	0.120674	2.81964e-187	B2UN34_AKKM8	Pirin domain protein
	AMUC_RS09760	Amuc_1828	12965.7	3296.06	0.254214	6.00139e-94
	AMUC_RS09765		3.88004	3.31054	0.853223	0.838127	A0A1Y3SVR7_9BACT	Uncharacterized protein
	AMUC_RS09770	Amuc_1829	195.968	275.6	1.40636	0.00148365	B2UN36_AKKM8	Class II aldolase/adducin family protein
	AMUC_RS09775	Amuc_1830	146.357	249.452	1.70441	5.12486e-06	B2UN37_AKKM8	L-fuculokinase (EC 2.7.1.51) (L-fuculose kinase)
	AMUC_RS09780	Amuc_1831	63.82	71.6124	1.1221	0.49574	B2UN38_AKKM8	Uncharacterized protein
	AMUC_RS09785	Amuc_1832	279.74	775.827	2.77339	9.37787e-26	B2UN39_AKKM8	L-fucose isomerase (FucIase) (EC 5.3.1.25) (6-deoxy-L-galactose isomerase)
	AMUC_RS09790	Amuc_1833	232.669	104.564	0.449412	7.19972e-10	B2UN40_AKKM8	L-fucose transporter
	AMUC_RS09795	Amuc_1834	1504.84	375.56	0.249568	1.42262e-42	B2UN41_AKKM8	Uncharacterized protein
	AMUC_RS09800	Amuc_1835	803.997	857.975	1.06714	0.401391
	AMUC_RS09805	Amuc_1836	2306.24	531.378	0.230409	1.36091e-92	B2UN43_AKKM8	RNA polymerase, sigma-24 subunit, ECF subfamily
	AMUC_RS09810		5.41574	1.8577	0.343019	0.174031	A0A1Y3SXU1_9BACT	Uncharacterized protein
	AMUC_RS09820	Amuc_1838	1057.43	211.637	0.200142	8.4056e-84	B2UN44_AKKM8	Uncharacterized protein
	AMUC_RS09825	Amuc_1839	134.303	33.7806	0.251525	5.76826e-16	B2UN45_AKKM8	Heavy metal translocating P-type ATPase
	AMUC_RS09830	Amuc_1840	2781.31	577.499	0.207635	4.24572e-114	B2UN46_AKKM8	Phosphomethylpyrimidine synthase (EC 4.1.99.17) (Hydroxymethylpyrimidine phosphate synthase) (HMP-P synthase) (HMP-phosphate synthase) (HMPP synthase) (Thiamine biosynthesis protein ThiC)
	AMUC_RS09840	Amuc_1842	3117.89	2465.08	0.790623	0.00127743	B2UN48_AKKM8	RNA polymerase, sigma-24 subunit, ECF subfamily
	AMUC_RS09845	Amuc_1843	607.958	1006.06	1.65482	1.02978e-10	B2UN49_AKKM8	Uncharacterized protein
	AMUC_RS09855	Amuc_1844	35337.8	6730.35	0.190457	1.05942e-189
	AMUC_RS09860		1.13139	0.996117	0.880435	0.954445	A0A1Y3T3G8_9BACT	Uncharacterized protein
	AMUC_RS09865		589.712	108.402	0.183822	3.35977e-71	A0A1Y3SXT0_9BACT	Uncharacterized protein
	AMUC_RS09870	Amuc_1847	107.296	103.518	0.964794	0.760504
	AMUC_RS09880	Amuc_1849	41.1707	22.6458	0.550046	0.0192082	B2UN52_AKKM8	Uncharacterized protein
	AMUC_RS09890	Amuc_1850	417.387	1053.9	2.52498	8.17217e-31
	AMUC_RS09895	Amuc_1851	24.2004	71.3079	2.94655	2.11563e-06	B2UN54_AKKM8	Oligopeptide/dipeptide ABC transporter, ATPase subunit
	AMUC_RS09900	Amuc_1852	78.5122	96.512	1.22926	0.261758	B2UN55_AKKM8	Oligopeptide/dipeptide ABC transporter, ATPase subunit
	AMUC_RS09905		813.514	338.544	0.41615	4.2812e-29	A0A1Y3STD5_9BACT	ABC transporter substrate-binding protein
	AMUC_RS09915	Amuc_1855	155.711	151.026	0.969916	0.818688	B2UN58_AKKM8	Binding-protein-dependent transport systems inner membrane component
	AMUC_RS09920	Amuc_1856	191.581	224.417	1.1714	0.184614	A0A1Y3STU6_9BACT	Metallophosphatase family protein
	AMUC_RS09925	Amuc_1857	259.274	256.705	0.99009	0.920463	B2UN60_AKKM8	Uncharacterized protein
	AMUC_RS09930	Amuc_1858	219.744	518.214	2.35827	4.44281e-15	B2UN61_AKKM8	Uncharacterized protein
	AMUC_RS09935	Amuc_1859	100.533	384.828	3.82787	6.14034e-30	B2UN62_AKKM8	2-dehydropantoate 2-reductase (EC 1.1.1.169) (Ketopantoate reductase)
	AMUC_RS09940	Amuc_1860	275.144	1135.95	4.12857	7.08672e-56
	AMUC_RS09945	Amuc_1861	79.4953	124.745	1.56922	0.00303068	B2UN64_AKKM8	Uncharacterized protein
	AMUC_RS09950	Amuc_1862	417.575	352.595	0.844388	0.0617733	B2UN65_AKKM8	Phosphoribosylamine--glycine ligase (EC 6.3.4.13) (GARS) (Glycinamide ribonucleotide synthetase) (Phosphoribosylglycinamide synthetase)
	AMUC_RS09955	Amuc_1863	902.309	860.684	0.953868	0.606051	B2UN66_AKKM8	Single-stranded DNA-binding protein
	AMUC_RS09960	Amuc_1864	316.012	1172.57	3.71052	1.11441e-56	B2UN67_AKKM8	Uncharacterized protein
	AMUC_RS09965	Amuc_1865	54.0472	157.915	2.92179	2.54407e-12	B2UN68_AKKM8	MotA/TolQ/ExbB proton channel
	AMUC_RS09970	Amuc_1866	39.4653	113.378	2.87286	2.1153e-08
	AMUC_RS09975	Amuc_1867	416.588	905.06	2.17255	8.90197e-22	B2UN70_AKKM8	Peptide deformylase (PDF) (EC 3.5.1.88) (Polypeptide deformylase)
	AMUC_RS09980	Amuc_1868	552.686	493.971	0.893763	0.20639	B2UN71_AKKM8	Glycoside hydrolase family 57
	AMUC_RS09985	Amuc_1869	5332.63	1672.57	0.313649	4.33458e-71	B2UN72_AKKM8	Glycosyl transferase group 1
	AMUC_RS09990	Amuc_1870	380.031	319.237	0.840029	0.123995	B2UN73_AKKM8	Alpha-glucosidase (EC 3.2.1.20)
	AMUC_RS09995	Amuc_1871	250.868	150.501	0.599919	8.97583e-06	B2UN74_AKKM8	Chorismate binding-like protein
	AMUC_RS10000	Amuc_1872	271.932	137.201	0.504541	2.04742e-10
	AMUC_RS10005	Amuc_1873	15.9158	37.4045	2.35016	0.00439153	B2UN76_AKKM8	Uncharacterized protein
	AMUC_RS10025	Amuc_1878	17.0752	18.6725	1.09354	0.791046	B2UN81_AKKM8	Lactoylglutathione lyase
	AMUC_RS10030	Amuc_1879	19.213	12.0404	0.626676	0.184569	B2UN82_AKKM8	Uncharacterized protein
	AMUC_RS10035	Amuc_1880	332.151	461.33	1.38891	0.000467348	B2UN83_AKKM8	Isocitrate dehydrogenase [NADP] (EC 1.1.1.42)
	AMUC_RS10040	Amuc_1881	92.6992	174.071	1.8778	2.03447e-06	B2UN84_AKKM8	Uncharacterized protein
	AMUC_RS10045	Amuc_1882	191.437	194.993	1.01858	0.888033	B2UN85_AKKM8	Uncharacterized protein
	AMUC_RS10050		1.81972	3.06353	1.68352	0.507088	A0A1Y3STZ0_9BACT	Uncharacterized protein
	AMUC_RS10055	Amuc_1883	219.542	259.225	1.18076	0.136591	B2UN86_AKKM8	Beta-lactamase domain protein
	AMUC_RS10060	Amuc_1884	28.0764	54.9267	1.95633	0.00594114	KTHY_AKKM8	Thymidylate kinase (EC 2.7.4.9) (dTMP kinase)
	AMUC_RS10065	Amuc_1885	35.1528	168.224	4.78551	3.24585e-20
	AMUC_RS10070	Amuc_1886	67.841	254.532	3.7519	4.63132e-22
	AMUC_RS10075	Amuc_1887	300.481	560.576	1.86559	1.57995e-12	B2UN90_AKKM8	MscS Mechanosensitive ion channel
	AMUC_RS10080	Amuc_1888	187.561	500.217	2.66696	2.5765e-22	SYE_AKKM8	Glutamate--tRNA ligase (EC 6.1.1.17) (Glutamyl-tRNA synthetase) (GluRS)
	AMUC_RS10090	Amuc_1890	39.4981	76.5783	1.93878	0.00412912	B2UN93_AKKM8	Undecaprenyl-diphosphatase (EC 3.6.1.27) (Bacitracin resistance protein) (Undecaprenyl pyrophosphate phosphatase)
	AMUC_RS10095	Amuc_1891	1581.46	2566.87	1.6231	1.29509e-14	B2UN94_AKKM8	Uncharacterized protein
	AMUC_RS10100	Amuc_1892	1490.86	173.494	0.116372	1.39054e-147	B2UN95_AKKM8	Uncharacterized protein
	AMUC_RS10105	Amuc_1893	384.117	117.974	0.30713	2.44742e-26	B2UN96_AKKM8	Uncharacterized protein
	AMUC_RS10110	Amuc_1894	70.8537	148.362	2.09391	3.36219e-07	AROA_AKKM8	3-phosphoshikimate 1-carboxyvinyltransferase (EC 2.5.1.19) (5-enolpyruvylshikimate-3-phosphate synthase) (EPSP synthase) (EPSPS)
	AMUC_RS10120	Amuc_1895	273.112	320.255	1.17261	0.16373	MURA_AKKM8	UDP-N-acetylglucosamine 1-carboxyvinyltransferase (EC 2.5.1.7) (Enoylpyruvate transferase) (UDP-N-acetylglucosamine enolpyruvyl transferase) (EPT)
	AMUC_RS10125	Amuc_1896	3684.87	1498.08	0.406547	1.05497e-35	B2UNJ4_AKKM8	Histone family protein DNA-binding protein
	AMUC_RS10130	Amuc_1897	931.3	915.425	0.982954	0.817399	AROC_AKKM8	Chorismate synthase (CS) (EC 4.2.3.5) (5-enolpyruvylshikimate-3-phosphate phospholyase)
	AMUC_RS10135	Amuc_1898	138.77	151.846	1.09423	0.545301	B2UNJ6_AKKM8	Uncharacterized protein
	AMUC_RS10140	Amuc_1899	218.13	54.1257	0.248135	7.4462e-26	B2UNJ7_AKKM8	Flavodoxin/nitric oxide synthase
	AMUC_RS10145	Amuc_1900	223.166	22.6004	0.101271	2.40068e-47	B2UNJ8_AKKM8	Uncharacterized protein
	AMUC_RS10150	Amuc_1901	8645.96	452.515	0.0523384	0
	AMUC_RS10155	Amuc_1902	236.006	951.429	4.03138	2.15254e-59	B2UNK0_AKKM8	Uncharacterized protein
	AMUC_RS10160	Amuc_1903	338.16	1073.12	3.1734	1.96871e-31	B2UNK1_AKKM8	Uncharacterized protein
	AMUC_RS10165	Amuc_1904	896.934	430.628	0.48011	2.36157e-20	A0A1Y3ST84_9BACT	Uncharacterized protein
	AMUC_RS10170	Amuc_1905	901.185	117.232	0.130086	7.76572e-86	B2UNK3_AKKM8	Site-specific DNA-methyltransferase (Adenine-specific) (EC 2.1.1.72)
	AMUC_RS10175	Amuc_1906	54.6539	19.9536	0.36509	1.15071e-05	B2UNK4_AKKM8	Tyrosine recombinase XerC
	AMUC_RS10180	Amuc_1907	161.617	39.6965	0.24562	2.51121e-17	B2UNK5_AKKM8	Uncharacterized protein
	AMUC_RS10185	Amuc_1908	129.316	101.084	0.781685	0.114301
	AMUC_RS10190	Amuc_1909	24.5331	55.0843	2.2453	0.00188127	B2UNK7_AKKM8	Uncharacterized protein
	AMUC_RS10195	Amuc_1910	465.187	128.354	0.275919	6.83839e-30	B2UNK8_AKKM8	Uncharacterized protein
	AMUC_RS10200	Amuc_1911	208.871	467.702	2.23919	4.95558e-15	B2UNK9_AKKM8	Iron-containing alcohol dehydrogenase
	AMUC_RS10205	Amuc_1913	906.327	388.613	0.428778	7.15245e-17	B2UNL0_AKKM8	Type I restriction enzyme R Protein (EC 3.1.21.3)
	AMUC_RS10215	Amuc_1915	391.717	343.358	0.876545	0.270365	B2UNL2_AKKM8	Type I restriction-modification system, M subunit
	AMUC_RS10220	Amuc_1916	22.2645	35.4161	1.5907	0.125923	B2UNL3_AKKM8	Putative fluoride ion transporter CrcB
	AMUC_RS10225	Amuc_1917	92.4018	222.168	2.40437	1.81735e-11	B2UNL4_AKKM8	PfkB domain protein
	AMUC_RS10230		94.2055	50.3959	0.534957	0.000653659	A0A1Y3STD3_9BACT	Uncharacterized protein
	AMUC_RS10235	Amuc_1918	374.486	714.364	1.90759	5.8596e-12	B2UNL5_AKKM8	Multifunctional fusion protein [Includes: UDP-3-O-acyl-N-acetylglucosamine deacetylase (UDP-3-O-acyl-GlcNAc deacetylase) (EC 3.5.1.108) (UDP-3-O-[R-3-hydroxymyristoyl]-N-acetylglucosamine deacetylase); 3-hydroxyacyl-[acyl-carrier-protein] dehydratase FabZ (EC 4.2.1.59) ((3R)-hydroxymyristoyl-[acyl-carrier-protein] dehydratase) (Beta-hydroxyacyl-ACP dehydratase) ((3R)-hydroxymyristoyl-ACP dehydras…
	AMUC_RS10240	Amuc_1919	69.552	91.576	1.31666	0.124906	B2UNL6_AKKM8	Nucleotidyl transferase
	AMUC_RS10245	Amuc_1920	27.6415	93.3513	3.37722	1.58092e-08
	AMUC_RS10250	Amuc_1921	345.485	125.782	0.364075	1.82324e-21
	AMUC_RS10255	Amuc_1922	550.342	644.594	1.17126	0.0829425	B2UNL9_AKKM8	Putative ferredoxin
	AMUC_RS10260	Amuc_1923	87.9683	40.2763	0.457851	3.95682e-05	B2UNM0_AKKM8	Uncharacterized protein
	AMUC_RS10265	Amuc_1924	339.342	452.014	1.33203	0.00180591	B2UNM1_AKKM8	Beta-N-acetylhexosaminidase (EC 3.2.1.52)
	AMUC_RS10270	Amuc_1925	39.091	13.9801	0.357629	0.000733289	B2UNM2_AKKM8	Uncharacterized protein
	AMUC_RS10275		2.74864	3.43771	1.25069	0.83818	A0A1Y3STV2_9BACT	Uncharacterized protein
	AMUC_RS10280	Amuc_1926	30.4054	9.69563	0.318878	0.000220132
	AMUC_RS10285	Amuc_1927	31.7439	11.1411	0.350968	0.000723147	B2UNM4_AKKM8	Uncharacterized protein
	AMUC_RS10290	Amuc_1928	284.89	60.8976	0.213758	3.42605e-30	B2UNM5_AKKM8	Periplasmic binding protein
	AMUC_RS10295	Amuc_1929	187.869	20.7362	0.110376	8.58324e-39	B2UNM6_AKKM8	ABC transporter related
	AMUC_RS10300	Amuc_1930	59.5985	6.01054	0.10085	1.40371e-15	B2UNM7_AKKM8	Transport system permease protein
	AMUC_RS10305	Amuc_1931	46.9326	9.20125	0.196052	4.49906e-09	B2UNM8_AKKM8	Transport system permease protein
	AMUC_RS10310		53.3722	16.7473	0.313783	8.81501e-06	B2UNM9_AKKM8	Endoribonuclease L-PSP
	AMUC_RS10315	Amuc_1933	202.43	55.3207	0.273283	1.17814e-20	B2UNN0_AKKM8	Uncharacterized protein
	AMUC_RS10320	Amuc_1934	199.05	68.9825	0.346558	2.04037e-15	B2UNN1_AKKM8	Uncharacterized protein
	AMUC_RS10325	Amuc_1935	865.304	285.727	0.330204	5.97438e-35	B2UNN2_AKKM8	GCN5-related N-acetyltransferase
	AMUC_RS10330	Amuc_1936	52443.4	5547.73	0.105785	1.62616e-231	A0A1Y3STU1_9BACT	Uncharacterized protein
	AMUC_RS10335	Amuc_1937	55.0536	39.2552	0.713037	0.107927	B2UNN4_AKKM8	Phosphoribosyltransferase
	AMUC_RS10340	Amuc_1938	469.368	490.222	1.04443	0.592302	B2UNN5_AKKM8	DNA polymerase I (EC 2.7.7.7)
	AMUC_RS10345		7.76007	16.8372	2.16972	0.0654185	A0A1Y3T378_9BACT	Uncharacterized protein
	AMUC_RS10350	Amuc_1939	955.486	708.832	0.741855	3.31306e-05	A0A1Y3T004_9BACT	Uncharacterized protein
	AMUC_RS10355	Amuc_1940	1906.17	1191.86	0.625266	1.26108e-09	B2UNN7_AKKM8	Uncharacterized protein
	AMUC_RS10360	Amuc_1941	107.006	401.333	3.75057	4.80059e-23	B2UNN8_AKKM8	Adenylosuccinate lyase (ASL) (EC 4.3.2.2) (Adenylosuccinase)
	AMUC_RS10365		3.6154	1.25453	0.346995	0.236863
	AMUC_RS10370	Amuc_1942	128.769	185.802	1.44291	0.00869351	B2UNN9_AKKM8	Peptidase T (EC 3.4.11.4) (Aminotripeptidase) (Tripeptidase) (Tripeptide aminopeptidase)
	AMUC_RS10375	Amuc_1943	1048.9	1809.34	1.725	5.07548e-15	B2UNP0_AKKM8	Tetratricopeptide TPR_2 repeat protein
	AMUC_RS10380	Amuc_1944	93.5906	229.704	2.45435	4.93419e-11	B2UNP1_AKKM8	6-phosphogluconate dehydrogenase NAD-binding
	AMUC_RS10385	Amuc_1945	93.6915	209.354	2.23451	4.05025e-09	B2UNP2_AKKM8	Uncharacterized protein
	AMUC_RS10390	Amuc_1946	106.43	262.036	2.46206	3.95979e-14	B2UNP3_AKKM8	Dihydrodipicolinate synthetase
	AMUC_RS10395	Amuc_1947	172.526	425.499	2.46629	2.53307e-17	B2UNP4_AKKM8	N-acylglucosamine 2-epimerase (EC 5.1.3.8)
	AMUC_RS10400	Amuc_1948	78.4355	48.4077	0.617166	0.0126036	B2UNP5_AKKM8	Uncharacterized protein
	AMUC_RS10405	Amuc_1949	371.732	136.528	0.367274	1.09396e-19	B2UNP6_AKKM8	Chorismate binding-like protein
	AMUC_RS10410	Amuc_1950	89.879	56.303	0.626431	0.00612158
	AMUC_RS10415	Amuc_1951	9385.7	1732.25	0.184563	6.02243e-166	A0A1Y3T3U6_9BACT	12-oxophytodienoate reductase
	AMUC_RS10420		14.2257	7.53451	0.529642	0.180813	B2UNP9_AKKM8	Conserved hypothetical integral membrane protein
	AMUC_RS10425	Amuc_1953	37.1016	72.1617	1.94498	0.00154751
	AMUC_RS10430	Amuc_1954	106.072	68.9221	0.649766	0.00520018	B2UNQ1_AKKM8	Glutamine amidotransferase class-I
	AMUC_RS10435	Amuc_1956	78.0839	52.3885	0.670926	0.0274617	B2UNQ3_AKKM8	Cys-tRNA(Pro)/Cys-tRNA(Cys) deacylase (EC 4.2.-.-)
	AMUC_RS10440	Amuc_1957	213.613	86.0203	0.402692	9.42022e-12	B2UNQ4_AKKM8	Membrane protein-like protein
	AMUC_RS10445	Amuc_1958	433.43	41.371	0.0954501	2.97111e-76	B2UNQ5_AKKM8	Uncharacterized protein
	AMUC_RS10455	Amuc_1959	152.196	47.0233	0.308965	6.57626e-13	B2UNQ6_AKKM8	Uncharacterized protein
	AMUC_RS10460	Amuc_1960	843.803	84.572	0.100227	5.16822e-109	B2UNQ7_AKKM8	PA14 domain protein
	AMUC_RS10465	Amuc_1961	113.535	512.751	4.51625	2.76834e-43	B2UNQ8_AKKM8	Methionine synthase (EC 2.1.1.13) (5-methyltetrahydrofolate--homocysteine methyltransferase)
	AMUC_RS10470	Amuc_1962	9.13268	52.6687	5.76706	2.38297e-08	B2UNQ9_AKKM8	Uncharacterized protein
	AMUC_RS10475	Amuc_1963	7.8957	38.1428	4.83083	4.66695e-05	B2UNR0_AKKM8	Uncharacterized protein
	AMUC_RS10490	Amuc_1964	589.226	644.458	1.09374	0.305072	B2UNR1_AKKM8	Homoserine dehydrogenase (EC 1.1.1.3)
	AMUC_RS10495	Amuc_1965	220.378	433.3	1.96616	1.12829e-09	B2UNR2_AKKM8	Aspartokinase (EC 2.7.2.4)
	AMUC_RS10500	Amuc_1967	174.625	153.859	0.881085	0.315115	B2UNR4_AKKM8	Thioredoxin domain
	AMUC_RS10505	Amuc_1968	191.16	28.9382	0.151382	4.73757e-30	B2UNR5_AKKM8	Conserved hypothetical integral membrane protein
	AMUC_RS10510	Amuc_1969	523.322	433.208	0.827803	0.0224786	A0A1Y3SVG3_9BACT	Uncharacterized protein
	AMUC_RS10515		9.92132	0.872615	0.0879536	0.0008993	A0A1Y3ST99_9BACT	Uncharacterized protein
	AMUC_RS10520	Amuc_1970	1194.66	1488.22	1.24572	0.00155884	B2UNR7_AKKM8	Vitamin B12-dependent ribonucleotide reductase (EC 1.17.4.1)
	AMUC_RS10525		3.71632	3.18703	0.857577	0.780891
	AMUC_RS10530	Amuc_1971	71.5028	218.145	3.05086	1.88993e-10
	AMUC_RS10535		83.8565	161.996	1.93182	5.92224e-06
	AMUC_RS10540	Amuc_1973	19.5792	91.6028	4.67857	6.1234e-12	LFTR_AKKM8	Leucyl/phenylalanyl-tRNA--protein transferase (EC 2.3.2.6) (L/F-transferase) (Leucyltransferase) (Phenyalanyltransferase)
	AMUC_RS10545	Amuc_1974	826.047	2530.32	3.06316	3.18459e-56	B2UNS1_AKKM8	Pyruvate, phosphate dikinase (EC 2.7.9.1)
	AMUC_RS10550		6.0419	3.82368	0.63286	0.588553	A0A1Y3SXM7_9BACT	Uncharacterized protein
	AMUC_RS10555	Amuc_1975	223.387	773.715	3.46357	2.34908e-32	B2UNS2_AKKM8	Glucose-6-phosphate isomerase (EC 5.3.1.9)
	AMUC_RS10560	Amuc_1976	172.772	572.818	3.31545	1.15332e-35	B2UNS3_AKKM8	Sel1 domain protein repeat-containing protein
	AMUC_RS10565	Amuc_1977	212.806	179.805	0.844927	0.165288	B2UNS4_AKKM8	Uncharacterized protein
	AMUC_RS10570	Amuc_1978	318.322	80.2632	0.252144	1.49179e-31	A0A1Y3ST89_9BACT	PEP-CTERM sorting domain-containing protein
	AMUC_RS10575		153.843	67.9265	0.441531	1.18346e-08
	AMUC_RS10580	Amuc_1982	56.787	23.1548	0.407749	0.000554172	B2UNS7_AKKM8	Uncharacterized protein
	AMUC_RS10585	Amuc_1983	1102.46	1771.7	1.60704	4.28544e-07	B2UNS8_AKKM8	Methylmalonyl-CoA mutase, large subunit (EC 5.4.99.2)
	AMUC_RS10590	Amuc_1984	3518.57	1972.05	0.56047	4.86201e-20	B2UNS9_AKKM8	Methylmalonyl-CoA mutase (EC 5.4.99.2)
	AMUC_RS10595	Amuc_1985	522.805	609.605	1.16603	0.178225	A0A1Y3SWT1_9BACT	Uncharacterized protein
	AMUC_RS10600	Amuc_1986	31.2534	82.6205	2.64357	2.35752e-06	B2UNT1_AKKM8	Uncharacterized protein
	AMUC_RS10605	Amuc_1987	18.0817	104.01	5.75222	5.58419e-13	B2UNT2_AKKM8	Squalene-hopene cyclase-like protein
	AMUC_RS10610	Amuc_1988	45.6141	265.144	5.81277	1.26781e-31	B2UNT3_AKKM8	Uncharacterized protein
	AMUC_RS10615	Amuc_1989	79.3655	229.548	2.89229	9.36768e-14	B2UNT4_AKKM8	Uncharacterized protein
	AMUC_RS10620	Amuc_1990	85.6556	249.455	2.91231	1.04561e-13
	AMUC_RS10625	Amuc_1991	51.2023	82.4459	1.6102	0.00688756
	AMUC_RS10630	Amuc_1992	626.593	334.559	0.533933	1.29497e-13	B2UP32_AKKM8	Uncharacterized protein
	AMUC_RS10635	Amuc_1993	223.012	205.103	0.919694	0.520763	B2UP33_AKKM8	Uncharacterized protein
	AMUC_RS10640		145.054	167.041	1.15158	0.289105	B2UP34_AKKM8	Serine/threonine protein kinase
	AMUC_RS10645	Amuc_1995	434.838	93.251	0.21445	5.39302e-42	B2UP35_AKKM8	Tryptophanase (EC 4.1.99.1)
	AMUC_RS10650		16.1804	11.5271	0.71241	0.411332	B2UP36_AKKM8	Uncharacterized protein
	AMUC_RS10660	Amuc_1998	268.723	552.769	2.05702	9.20389e-10	B2UP38_AKKM8	Phenylalanine--tRNA ligase beta subunit (EC 6.1.1.20) (Phenylalanyl-tRNA synthetase beta subunit) (PheRS)
	AMUC_RS10665	Amuc_1999	148.224	326.463	2.20249	6.09947e-10	B2UP39_AKKM8	Phenylalanine--tRNA ligase alpha subunit (EC 6.1.1.20) (Phenylalanyl-tRNA synthetase alpha subunit) (PheRS)
	AMUC_RS10670	Amuc_2000	4314.12	649.341	0.150515	8.30986e-191	B2UP40_AKKM8	Major facilitator superfamily MFS_1
	AMUC_RS10675		4150.19	1044.36	0.251641	6.07339e-106	B2UP41_AKKM8	Putative lipoprotein
	AMUC_RS10680	Amuc_2002	5630.35	1993.94	0.354141	5.28603e-65	B2UP42_AKKM8	Chaperone protein HtpG (Heat shock protein HtpG) (High temperature protein G)
	AMUC_RS10685		222.397	77.4091	0.348067	7.36492e-14
	AMUC_RS10695		17.5189	8.87119	0.506378	0.161001	A0A1Y3SZ32_9BACT	Uncharacterized protein
	AMUC_RS10700	Amuc_2006	19.2706	28.0729	1.45678	0.285975	B2UP45_AKKM8	Integrase family protein
	AMUC_RS10705	Amuc_2008	19.9208	19.0656	0.95707	0.873078	B2UP47_AKKM8	CRISPR-associated endoribonuclease Cas2 (EC 3.1.-.-)
	AMUC_RS10715	Amuc_2010	410.015	204.87	0.499665	1.68466e-10
	AMUC_RS10720	Amuc_2011	200.915	394.756	1.96479	6.46748e-08	B2UP50_AKKM8	Alanine racemase (EC 5.1.1.1)
	AMUC_RS10725	Amuc_2012	124.651	109.032	0.874698	0.521193	A0A1Y3SXY4_9BACT	Rrf2 family transcriptional regulator
	AMUC_RS10730	Amuc_2013	1692.25	988.754	0.584285	4.90407e-14	B2UP52_AKKM8	O-acetylhomoserine/O-acetylserine sulfhydrylase (EC 2.5.1.49)
	AMUC_RS10735	Amuc_2014	1488.73	1162.77	0.781047	0.00629617	B2UP53_AKKM8	Cysteine synthase (EC 2.5.1.47)
	AMUC_RS10740	Amuc_2015	230.341	236.939	1.02864	0.938985	B2UP54_AKKM8	Thiamine-phosphate synthase (TP synthase) (TPS) (EC 2.5.1.3) (Thiamine-phosphate pyrophosphorylase) (TMP pyrophosphorylase) (TMP-PPase)
	AMUC_RS10745	Amuc_2016	199.909	201.779	1.00935	0.997884	THIM_AKKM8	Hydroxyethylthiazole kinase (EC 2.7.1.50) (4-methyl-5-beta-hydroxyethylthiazole kinase) (TH kinase) (Thz kinase)
	AMUC_RS10760		102.068	39.7834	0.389772	4.17747e-08	B2UP57_AKKM8	Beta-N-acetylhexosaminidase (EC 3.2.1.52)
	AMUC_RS10765		585.868	265.757	0.453611	3.93686e-20	B2UP58_AKKM8	Beta-N-acetylhexosaminidase (EC 3.2.1.52)
	AMUC_RS10770	Amuc_2020	102.987	118.751	1.15306	0.315321	B2UP59_AKKM8	LAO/AO transport system ATPase
	AMUC_RS10775	Amuc_2021	132.328	167.711	1.26739	0.0650322
	AMUC_RS10780	Amuc_2022	3150.54	316.728	0.100531	2.5918e-129
	AMUC_RS10785	Amuc_2023	189.263	44.3057	0.234096	6.18948e-21	B2UP62_AKKM8	Uncharacterized protein
	AMUC_RS10790	Amuc_2024	29.375	118.278	4.02649	1.06024e-12	RUVC_AKKM8	Crossover junction endodeoxyribonuclease RuvC (EC 3.1.22.4) (Holliday junction nuclease RuvC) (Holliday junction resolvase RuvC)
	AMUC_RS10795	Amuc_2025	216.607	693.221	3.20036	5.9224e-37	B2UP64_AKKM8	DEAD/DEAH box helicase domain protein
	AMUC_RS10805	Amuc_2027	365.869	296.568	0.810586	0.0240343	B2UP66_AKKM8	Dihydroorotase (DHOase) (EC 3.5.2.3)
	AMUC_RS10820	Amuc_2028	808.356	637.186	0.788248	0.00783397	B2UP67_AKKM8	Transcriptional regulator, MarR family
	AMUC_RS10825	Amuc_2029	1027.09	4337.96	4.22356	4.04543e-113	B2UP68_AKKM8	Efflux transporter, RND family, MFP subunit
	AMUC_RS10830	Amuc_2030	976.997	2819.71	2.8861	1.44587e-53	B2UP69_AKKM8	Transporter, hydrophobe/amphiphile efflux-1 (HAE1) family
	AMUC_RS10835	Amuc_2031	73.5249	89.6042	1.21869	0.265992	B2UP70_AKKM8	Dihydrofolate reductase (EC 1.5.1.3)
	AMUC_RS10840	Amuc_2032	305.115	210.85	0.69105	0.000809063	B2UP71_AKKM8	Thymidylate synthase (TS) (TSase) (EC 2.1.1.45)
	AMUC_RS10845	Amuc_2033	297.468	148.747	0.500043	1.9793e-10	A0A1Y3T3L5_9BACT	Cardiolipin synthase
	AMUC_RS10850	Amuc_2034	1563.81	914.105	0.584537	1.80574e-09	B2UP73_AKKM8	Methylmalonyl-CoA carboxytransferase (EC 2.1.3.1)
	AMUC_RS10855	Amuc_2035	332.503	89.4106	0.268901	6.8917e-31	B2UP74_AKKM8	Uncharacterized protein
	AMUC_RS10860	Amuc_2036	165.248	102.486	0.620193	0.000674596	B2UP75_AKKM8	MATE efflux family protein
	AMUC_RS10865	Amuc_2037	560.735	722.647	1.28875	0.0039726	B2UP76_AKKM8	Iron-sulfur cluster carrier protein
	AMUC_RS10870	Amuc_2038	1012.46	553.847	0.547032	2.78104e-10	B2UP77_AKKM8	PUR-alpha/beta/gamma DNA/RNA-binding
	AMUC_RS10875		12.2616	27.5254	2.24485	0.019656	A0A1Y3SZ57_9BACT	Uncharacterized protein
	AMUC_RS10880	Amuc_2039	458.733	533.529	1.16305	0.1066	B2UP78_AKKM8	2-isopropylmalate synthase/homocitrate synthase family protein
	AMUC_RS10885	Amuc_2040	67.8826	180.602	2.66051	1.41136e-11	A0A1Y3T1E8_9BACT	Uncharacterized protein
	AMUC_RS10890	Amuc_2041	161.323	855.572	5.30348	7.62583e-62	B2UP80_AKKM8	Efflux transporter, RND family, MFP subunit
	AMUC_RS10895	Amuc_2042	176.045	1405.77	7.98527	3.9231e-118	B2UP81_AKKM8	Transporter, hydrophobe/amphiphile efflux-1 (HAE1) family
	AMUC_RS10900	Amuc_2043	83.0872	889.529	10.706	6.52754e-92
	AMUC_RS10905	Amuc_2044	28.047	258.349	9.2113	1.13813e-37	B2UP83_AKKM8	Uncharacterized protein
	AMUC_RS10910	Amuc_2045	77.5459	113.899	1.46879	0.0286766	B2UP84_AKKM8	Uncharacterized protein
	AMUC_RS10915	Amuc_2046	377.061	319.034	0.846106	0.0716347	B2UP85_AKKM8	Uncharacterized protein
	AMUC_RS10920	Amuc_2047	178.806	159.014	0.889313	0.348854	B2UP86_AKKM8	Uncharacterized protein
	AMUC_RS10930	Amuc_2049	1503.11	464.168	0.308805	1.3286e-31	B2UP88_AKKM8	Chloride channel core
	AMUC_RS10935		33.8818	9.39221	0.277205	3.4285e-05	A0A1Y3T1G3_9BACT	Uncharacterized protein
	AMUC_RS10945		12.6225	2.92863	0.232016	0.00500645	A0A1Y3T3N3_9BACT	Uncharacterized protein
	AMUC_RS10950	Amuc_2051	1372.16	1713.98	1.24911	0.00114974	B2UP90_AKKM8	Glutamate dehydrogenase
	AMUC_RS10955	Amuc_2052	711.048	209.569	0.294732	5.69962e-45
	AMUC_RS10960	Amuc_2053	117.039	156.917	1.34072	0.0313721	B2UP92_AKKM8	SNARE associated Golgi protein
	AMUC_RS10965	Amuc_2054	14.5284	26.6187	1.83218	0.073089	B2UP93_AKKM8	Uncharacterized protein
	AMUC_RS10970	Amuc_2055	7698.16	1303.54	0.169331	4.48922e-109	B2UP94_AKKM8	Uncharacterized protein
	AMUC_RS10975	Amuc_2056	4785.21	636.93	0.133104	5.18717e-137	A0A1Y3SZ73_9BACT	Rubrerythrin
	AMUC_RS10980	Amuc_2057	2298.78	2522.93	1.09751	0.177967	B2UP96_AKKM8	Uncharacterized protein
	AMUC_RS10990	Amuc_2058	78.4206	59.4588	0.758203	0.135351	B2UP97_AKKM8	Uncharacterized protein
	AMUC_RS10995	Amuc_2059	28.0183	22.3579	0.797976	0.436653	B2UP98_AKKM8	Uncharacterized protein
	AMUC_RS11000	Amuc_2060	85.6221	52.4896	0.613038	0.00385418	B2UP99_AKKM8	Uncharacterized protein
	AMUC_RS11005	Amuc_2061	48.209	42.7215	0.886173	0.710542	B2UPA0_AKKM8	Uncharacterized protein
	AMUC_RS11010	Amuc_2062	19.7423	9.80811	0.496806	0.0575614	B2UPA1_AKKM8	Uncharacterized protein
	AMUC_RS11015	Amuc_2063	3.35076	1.69654	0.506314	0.494491	B2UPA2_AKKM8	Uncharacterized protein
	AMUC_RS11020	Amuc_2064	2.7874	2.42321	0.869346	0.863342	B2UPA3_AKKM8	Uncharacterized protein
	AMUC_RS11025	Amuc_2065	1552.12	91.8498	0.0591768	2.40769e-210	B2UPA4_AKKM8	Acyltransferase 3
	AMUC_RS11030		29.4765	3.19439	0.108371	2.17245e-08	A0A1Y3SX70_9BACT	Uncharacterized protein
	AMUC_RS11035	Amuc_2066	1628.22	873.649	0.536568	2.95053e-19	B2UPA5_AKKM8	Aldehyde Dehydrogenase
	AMUC_RS11040	Amuc_2067	391.96	318.924	0.813665	0.028657	B2UPA6_AKKM8	Uncharacterized protein
	AMUC_RS11045		650.373	345.919	0.531878	3.64047e-13	A0A1Y3SX49_9BACT	Uncharacterized protein
	AMUC_RS11050		17.5377	8.62103	0.491572	0.0664239
	AMUC_RS11055	Amuc_2070	4368.84	1851.2	0.423729	1.28137e-38
	AMUC_RS11065	Amuc_2071	403.534	69.2971	0.171725	1.90327e-58
	AMUC_RS11070	Amuc_2072	2194.87	278.096	0.126703	2.9237e-140	B2UPB0_AKKM8	Rubrerythrin
	AMUC_RS11075	Amuc_2074	36.6504	31.7496	0.866283	0.695975	B2UPB2_AKKM8	Acetyltransferase including N-acetylase of ribosomal protein-like protein
	AMUC_RS11080	Amuc_2075	62.5924	99.617	1.59152	0.00552804	B2UPB3_AKKM8	Uncharacterized protein
	AMUC_RS11085	Amuc_2076	775.352	619.108	0.798486	0.00434976
[truncated: 248 more rows]
