# Supplementary material for: Elucidation of Akkermansia muciniphila Probiotic Traits Driven by Mucin Depletion
Source: Front Microbiol. 2019 May 22;10:1137. doi: 10.3389/fmicb.2019.01137 (PMC6538878; doi:10.3389/fmicb.2019.01137)
Supplement: Supplementary file 3 [file Table_3.XLSX]

## Sheet: Sheet1
Supplementary Table S3. Functional enrichment of GO term and KEGG pathway enrichment analysis in the identified DEGs.
Gene expression	ID	GO Term / KEGG	Source	Term PValue (Benjamini-Hochberg)	Associated Genes
Up-regulated	ko03010	Ribosome	KEGG	0.00033	[Amuc_0247, Amuc_0293, Amuc_0294, Amuc_0295, Amuc_0296, Amuc_0297, Amuc_0298, Amuc_0300, Amuc_0301, Amuc_0302, Amuc_0303, Amuc_0304, Amuc_0305, Amuc_0307, Amuc_0308, Amuc_0416, Amuc_0438, Amuc_0439, Amuc_0674, Amuc_0925, Amuc_0926, Amuc_0927, Amuc_0928, Amuc_0929, Amuc_0931, Amuc_1042, Amuc_1043, Amuc_1044, Amuc_1045, Amuc_1234, Amuc_1235, Amuc_1472]
	ko00190	Oxidative phosphorylation	KEGG	3.1e-06	[Amuc_0505, Amuc_0506, Amuc_0507, Amuc_0508, Amuc_0509, Amuc_0510, Amuc_0938, Amuc_0984, Amuc_0985, Amuc_0986, Amuc_1225, Amuc_1604, Amuc_1605, Amuc_1606, Amuc_1607, Amuc_1608, Amuc_1609, Amuc_1610, Amuc_1611, Amuc_1612, Amuc_1613, Amuc_1614]
	GO:0050794	regulation of cellular process	GO_BiologicalProcess	0.007	[Amuc_0246, Amuc_0857, Amuc_1180, Amuc_1484, Amuc_2173]
	GO:0003677	DNA binding	GO_MolecularFunction	0.014	[Amuc_0246, Amuc_0325, Amuc_0374, Amuc_0683, Amuc_0898, Amuc_1180, Amuc_1227, Amuc_1228, Amuc_1521, Amuc_1522]
	GO:0003954	NADH dehydrogenase activity	GO_MolecularFunction	0.017	[Amuc_1605, Amuc_1606, Amuc_1608, Amuc_1611, Amuc_1612]
	GO:0050136	NADH dehydrogenase (quinone) activity	GO_MolecularFunction	0.017	[Amuc_1605, Amuc_1606, Amuc_1608, Amuc_1611, Amuc_1612]
	GO:0008137	NADH dehydrogenase (ubiquinone) activity	GO_MolecularFunction	0.017	[Amuc_1605, Amuc_1606, Amuc_1608, Amuc_1611, Amuc_1612]
Down-regulated	ko03010	Ribosome	KEGG	0.011	[Amuc_1257, Amuc_1556, Amuc_1557]
	GO:0016798	hydrolase activity, acting on glycosyl bonds	GO_MolecularFunction	0.046	[Amuc_0017, Amuc_0052, Amuc_0146, Amuc_0369, Amuc_0539, Amuc_0724, Amuc_0855, Amuc_0868, Amuc_0875, Amuc_0920, Amuc_1120, Amuc_1467, Amuc_1666, Amuc_1669, Amuc_1686, Amuc_1751, Amuc_1812, Amuc_2108, Amuc_2164]
	GO:1901564	organonitrogen compound metabolic process	GO_BiologicalProcess	0.032	[Amuc_0372, Amuc_0400, Amuc_0664, Amuc_0730, Amuc_0813, Amuc_1223, Amuc_1300, Amuc_1301, Amuc_1386, Amuc_1491, Amuc_1995, Amuc_2164]
	GO:0003676	nucleic acid binding	GO_MolecularFunction	0.029	[Amuc_0015, Amuc_0051, Amuc_0109, Amuc_0127, Amuc_0133, Amuc_0261, Amuc_0262, Amuc_0330, Amuc_0377, Amuc_0468, Amuc_0486, Amuc_0811, Amuc_0816, Amuc_0888, Amuc_0910, Amuc_1007, Amuc_1067, Amuc_1110, Amuc_1115, Amuc_1194, Amuc_1316, Amuc_1361, Amuc_1365, Amuc_1367, Amuc_1368, Amuc_1377, Amuc_1378, Amuc_1517, Amuc_1574, Amuc_1577, Amuc_1578, Amuc_1659, Amuc_1663, Amuc_1668, Amuc_1701, Amuc_1770, Am…
	GO:0003677	DNA binding	GO_MolecularFunction	0.00091	[Amuc_0109, Amuc_0127, Amuc_0133, Amuc_0261, Amuc_0262, Amuc_0330, Amuc_0377, Amuc_0468, Amuc_0486, Amuc_0811, Amuc_0816, Amuc_0888, Amuc_0910, Amuc_1007, Amuc_1067, Amuc_1110, Amuc_1115, Amuc_1194, Amuc_1316, Amuc_1361, Amuc_1365, Amuc_1367, Amuc_1368, Amuc_1377, Amuc_1378, Amuc_1517, Amuc_1577, Amuc_1659, Amuc_1663, Amuc_1668, Amuc_1701, Amuc_1770, Amuc_1810, Amuc_1836, Amuc_1838, Amuc_1896, Am…
	GO:0050794	regulation of cellular process	GO_BiologicalProcess	0.014	[Amuc_0109, Amuc_0147, Amuc_0311, Amuc_0377, Amuc_0378, Amuc_0468, Amuc_0486, Amuc_0624, Amuc_0691, Amuc_0730, Amuc_0827, Amuc_0888, Amuc_0910, Amuc_1007, Amuc_1067, Amuc_1110, Amuc_1316, Amuc_1321, Amuc_1368, Amuc_1516, Amuc_1517, Amuc_1635, Amuc_1701, Amuc_1770, Amuc_1810, Amuc_1836, Amuc_1838, Amuc_1841]
	GO:0006820	anion transport	GO_BiologicalProcess	0.028	[Amuc_0037, Amuc_0367, Amuc_0717, Amuc_1304, Amuc_1410, Amuc_1445, Amuc_2049]
	GO:0098656	anion transmembrane transport	GO_BiologicalProcess	0.023	[Amuc_0037, Amuc_0367, Amuc_0717, Amuc_1304, Amuc_1445, Amuc_2049]
	GO:0019222	regulation of metabolic process	GO_BiologicalProcess	0.049	[Amuc_0109, Amuc_0377, Amuc_0468, Amuc_0486, Amuc_0624, Amuc_0888, Amuc_0910, Amuc_1007, Amuc_1067, Amuc_1110, Amuc_1316, Amuc_1368, Amuc_1517, Amuc_1701, Amuc_1770, Amuc_1810, Amuc_1836, Amuc_1838]
	GO:0009889	regulation of biosynthetic process	GO_BiologicalProcess	0.032	[Amuc_0109, Amuc_0377, Amuc_0468, Amuc_0486, Amuc_0624, Amuc_0888, Amuc_0910, Amuc_1007, Amuc_1067, Amuc_1110, Amuc_1316, Amuc_1368, Amuc_1517, Amuc_1701, Amuc_1770, Amuc_1810, Amuc_1836, Amuc_1838]
	GO:0031323	regulation of cellular metabolic process	GO_BiologicalProcess	0.049	[Amuc_0109, Amuc_0377, Amuc_0468, Amuc_0486, Amuc_0624, Amuc_0888, Amuc_0910, Amuc_1007, Amuc_1067, Amuc_1110, Amuc_1316, Amuc_1368, Amuc_1517, Amuc_1701, Amuc_1770, Amuc_1810, Amuc_1836, Amuc_1838]
	GO:0051171	regulation of nitrogen compound metabolic process	GO_BiologicalProcess	0.032	[Amuc_0109, Amuc_0377, Amuc_0468, Amuc_0486, Amuc_0624, Amuc_0888, Amuc_0910, Amuc_1007, Amuc_1067, Amuc_1110, Amuc_1316, Amuc_1368, Amuc_1517, Amuc_1701, Amuc_1770, Amuc_1810, Amuc_1836, Amuc_1838]
	GO:0060255	regulation of macromolecule metabolic process	GO_BiologicalProcess	0.049	[Amuc_0109, Amuc_0377, Amuc_0468, Amuc_0486, Amuc_0624, Amuc_0888, Amuc_0910, Amuc_1007, Amuc_1067, Amuc_1110, Amuc_1316, Amuc_1368, Amuc_1517, Amuc_1701, Amuc_1770, Amuc_1810, Amuc_1836, Amuc_1838]
	GO:0080090	regulation of primary metabolic process	GO_BiologicalProcess	0.049	[Amuc_0109, Amuc_0377, Amuc_0468, Amuc_0486, Amuc_0624, Amuc_0888, Amuc_0910, Amuc_1007, Amuc_1067, Amuc_1110, Amuc_1316, Amuc_1368, Amuc_1517, Amuc_1701, Amuc_1770, Amuc_1810, Amuc_1836, Amuc_1838]
	GO:0010468	regulation of gene expression	GO_BiologicalProcess	0.032	[Amuc_0109, Amuc_0377, Amuc_0468, Amuc_0486, Amuc_0624, Amuc_0888, Amuc_0910, Amuc_1007, Amuc_1067, Amuc_1110, Amuc_1316, Amuc_1368, Amuc_1517, Amuc_1701, Amuc_1770, Amuc_1810, Amuc_1836, Amuc_1838]
	GO:0010556	regulation of macromolecule biosynthetic process	GO_BiologicalProcess	0.032	[Amuc_0109, Amuc_0377, Amuc_0468, Amuc_0486, Amuc_0624, Amuc_0888, Amuc_0910, Amuc_1007, Amuc_1067, Amuc_1110, Amuc_1316, Amuc_1368, Amuc_1517, Amuc_1701, Amuc_1770, Amuc_1810, Amuc_1836, Amuc_1838]
	GO:0019219	regulation of nucleobase-containing compound metabolic process	GO_BiologicalProcess	0.028	[Amuc_0109, Amuc_0377, Amuc_0468, Amuc_0486, Amuc_0624, Amuc_0888, Amuc_0910, Amuc_1007, Amuc_1067, Amuc_1110, Amuc_1316, Amuc_1368, Amuc_1517, Amuc_1701, Amuc_1770, Amuc_1810, Amuc_1836, Amuc_1838]
	GO:0031326	regulation of cellular biosynthetic process	GO_BiologicalProcess	0.032	[Amuc_0109, Amuc_0377, Amuc_0468, Amuc_0486, Amuc_0624, Amuc_0888, Amuc_0910, Amuc_1007, Amuc_1067, Amuc_1110, Amuc_1316, Amuc_1368, Amuc_1517, Amuc_1701, Amuc_1770, Amuc_1810, Amuc_1836, Amuc_1838]
	GO:0051252	regulation of RNA metabolic process	GO_BiologicalProcess	0.028	[Amuc_0109, Amuc_0377, Amuc_0468, Amuc_0486, Amuc_0624, Amuc_0888, Amuc_0910, Amuc_1007, Amuc_1067, Amuc_1110, Amuc_1316, Amuc_1368, Amuc_1517, Amuc_1701, Amuc_1770, Amuc_1810, Amuc_1836, Amuc_1838]
	GO:2000112	regulation of cellular macromolecule biosynthetic process	GO_BiologicalProcess	0.032	[Amuc_0109, Amuc_0377, Amuc_0468, Amuc_0486, Amuc_0624, Amuc_0888, Amuc_0910, Amuc_1007, Amuc_1067, Amuc_1110, Amuc_1316, Amuc_1368, Amuc_1517, Amuc_1701, Amuc_1770, Amuc_1810, Amuc_1836, Amuc_1838]
	GO:0032774	RNA biosynthetic process	GO_BiologicalProcess	0.028	[Amuc_0109, Amuc_0377, Amuc_0468, Amuc_0486, Amuc_0624, Amuc_0888, Amuc_0910, Amuc_1007, Amuc_1067, Amuc_1110, Amuc_1316, Amuc_1368, Amuc_1517, Amuc_1577, Amuc_1701, Amuc_1770, Amuc_1810, Amuc_1836, Amuc_1838]
	GO:2001141	regulation of RNA biosynthetic process	GO_BiologicalProcess	0.028	[Amuc_0109, Amuc_0377, Amuc_0468, Amuc_0486, Amuc_0624, Amuc_0888, Amuc_0910, Amuc_1007, Amuc_1067, Amuc_1110, Amuc_1316, Amuc_1368, Amuc_1517, Amuc_1701, Amuc_1770, Amuc_1810, Amuc_1836, Amuc_1838]
	GO:0006351	transcription, DNA-templated	GO_BiologicalProcess	0.027	[Amuc_0109, Amuc_0377, Amuc_0468, Amuc_0486, Amuc_0624, Amuc_0888, Amuc_0910, Amuc_1007, Amuc_1067, Amuc_1110, Amuc_1316, Amuc_1368, Amuc_1517, Amuc_1577, Amuc_1701, Amuc_1770, Amuc_1810, Amuc_1836, Amuc_1838]
	GO:0097659	nucleic acid-templated transcription	GO_BiologicalProcess	0.027	[Amuc_0109, Amuc_0377, Amuc_0468, Amuc_0486, Amuc_0624, Amuc_0888, Amuc_0910, Amuc_1007, Amuc_1067, Amuc_1110, Amuc_1316, Amuc_1368, Amuc_1517, Amuc_1577, Amuc_1701, Amuc_1770, Amuc_1810, Amuc_1836, Amuc_1838]
	GO:0006355	regulation of transcription, DNA-templated	GO_BiologicalProcess	0.028	[Amuc_0109, Amuc_0377, Amuc_0468, Amuc_0486, Amuc_0624, Amuc_0888, Amuc_0910, Amuc_1007, Amuc_1067, Amuc_1110, Amuc_1316, Amuc_1368, Amuc_1517, Amuc_1701, Amuc_1770, Amuc_1810, Amuc_1836, Amuc_1838]
	GO:1903506	regulation of nucleic acid-templated transcription	GO_BiologicalProcess	0.028	[Amuc_0109, Amuc_0377, Amuc_0468, Amuc_0486, Amuc_0624, Amuc_0888, Amuc_0910, Amuc_1007, Amuc_1067, Amuc_1110, Amuc_1316, Amuc_1368, Amuc_1517, Amuc_1701, Amuc_1770, Amuc_1810, Amuc_1836, Amuc_1838]
