# Supplementary material for: Elucidation of Akkermansia muciniphila Probiotic Traits Driven by Mucin Depletion
Source: Front Microbiol. 2019 May 22;10:1137. doi: 10.3389/fmicb.2019.01137 (PMC6538878; doi:10.3389/fmicb.2019.01137)
Supplement: Supplementary file 5 [file Table_5.XLSX]

## Sheet: Sheet1
	Supplementary Table S5. Predicted extracellular proteins in A. muciniphila genome
	Locus_tag	Locus_tag (old)	Uniprot	LipoP	HMTMM	Mucin+	Mucin-	Fold-change	Adj. P-val	Function
	AMUC_RS00040	Amuc_0006	B2UL64	TMH	1	474.845	247.319	0.520842	6.8812e-13	Uncharacterized protein
	AMUC_RS00060		B2UL68	SpI	0	83.1347	105.683	1.27123	0.131195	Alpha-L-fucosidase (EC 3.2.1.51)
	AMUC_RS00085	Amuc_0016	B2UL74	SpI	0	239764	9961.29	0.0415463	0	Uncharacterized protein
	AMUC_RS00095	Amuc_0017	B2UL75	SpI	0	2008.72	805.333	0.400918	3.36745e-38	Glycosyl hydrolase family 109 protein 1 (EC 3.2.1.-)
	AMUC_RS00120	Amuc_0022		SpI	0	235.23	93.5209	0.397573	2.01832e-13
	AMUC_RS00135	Amuc_0025		SpI	0	638.877	591.511	0.925859	0.343101
	AMUC_RS00140	Amuc_0026	B2UL84	SpI	0	320.986	476.852	1.48558	2.46687e-05	Uncharacterized protein
	AMUC_RS00315	Amuc_0053	A0A1Y3SY79	SpI	0	210.618	462.14	2.19421	5.0079e-15	Zinc ABC transporter substrate-binding protein
	AMUC_RS00320	Amuc_0054	B2ULB1	TMH	0	85.5793	182.059	2.12737	4.23785e-08	Uncharacterized protein
	AMUC_RS00350	Amuc_0060	B2ULB7	SpI	0	78.0082	63.6879	0.816425	0.300654	Alpha-N-acetylglucosaminidase (EC 3.2.1.50)
	AMUC_RS00390	Amuc_0066	B2ULC2	SpI	0	267.291	465.545	1.74171	1.11163e-09	Putative ATP/GTP-binding protein
	AMUC_RS00425		A0A1Y3SYA1	SpII	0	36.1239	33.1541	0.917786	0.663624	Uncharacterized protein
	AMUC_RS00435	Amuc_0074	B2ULD0	SpII	0	24.7644	84.6098	3.41659	2.76177e-08	Uncharacterized protein
	AMUC_RS00485	Amuc_0081	B2ULD7	SpII	0	551.301	133.803	0.242705	1.05279e-44	Uncharacterized protein
	AMUC_RS00495	Amuc_0083	B2ULD9	SpI	0	2196.97	359.316	0.16355	6.366e-112	Uncharacterized protein
	AMUC_RS00600	Amuc_0102	B2ULQ3	SpI	1	4442.21	2710.63	0.610199	8.7631e-14	Efflux transporter, RND family, MFP subunit
	AMUC_RS00615	Amuc_0105	B2ULQ6	SpI	0	193.636	587.307	3.03305	1.24152e-26	RND efflux system, outer membrane lipoprotein, NodT family
	AMUC_RS00690	Amuc_0119	B2ULS0	SpII	0	133.816	303.232	2.26603	5.20784e-12	Uncharacterized protein
	AMUC_RS00700	Amuc_0121	B2ULS2	SpI	0	117.112	285.068	2.43415	4.3709e-14	Sulfatase
	AMUC_RS00720	Amuc_0124	A0A1Y3T2B7	SpI	0	86.581	38.7232	0.447248	1.98743e-05	Uncharacterized protein
	AMUC_RS00725	Amuc_0125	B2ULS5	SpI	0	219.378	36.4238	0.166032	2.29423e-35	Lipolytic protein G-D-S-L family
	AMUC_RS00845	Amuc_0146		SpI	0	239.058	104.197	0.435866	5.84406e-10
	AMUC_RS00865	Amuc_0149	B2ULU9	SpI	0	127.806	95.9269	0.750564	0.0803516	Metallophosphoesterase
	AMUC_RS00870	Amuc_0150	B2ULV0	SpI	0	117.526	107.283	0.912841	0.67781	Uncharacterized protein
	AMUC_RS00895	Amuc_0154	A0A1Y3T2H4	SpII	0	277.263	394.115	1.42145	0.000283646	Uncharacterized protein
	AMUC_RS00990	Amuc_0172	B2ULX2	SpI	1	2628.86	1607.24	0.611384	1.45269e-08	Uncharacterized protein
	AMUC_RS01000	Amuc_0174	B2ULX4	SpI	0	451.402	502.771	1.1138	0.223567	Uncharacterized protein
	AMUC_RS01005	Amuc_0175	B2ULX5	SpI	0	1450.2	2168.91	1.49559	1.12115e-10	PDZ/DHR/GLGF domain protein
	AMUC_RS01045	Amuc_0183		SpI	0	82.3695	180.897	2.19616	5.62106e-09
	AMUC_RS01065	Amuc_0186		SpI	0	194.403	113.35	0.583066	1.40934e-05
	AMUC_RS01070	Amuc_0187	B2UM82	SpII	0	41.9212	85.8677	2.04831	0.000161589	Peptidase M28
	AMUC_RS01075	Amuc_0188	B2UM83	SpI	0	20.0023	31.668	1.58322	0.112374	Esterase/lipase-like protein
	AMUC_RS01125	Amuc_0199		SpI	1	139.184	145.826	1.04772	0.737192
	AMUC_RS01200	Amuc_0215	B2UMA9	TMH	0	357.832	69.6648	0.194686	4.0216e-46	Uncharacterized protein
	AMUC_RS01205	Amuc_0216	B2UMB0	SpI	0	431.814	396.866	0.919068	0.35867	Uncharacterized protein
	AMUC_RS01250	Amuc_0225		SpII	0	188.287	111.315	0.591201	1.67231e-05
	AMUC_RS01255	Amuc_0226		SpI	0	400.429	203.222	0.50751	4.41527e-09
	AMUC_RS01260	Amuc_0227	A0A1Y3SRC1	SpI	0	52.9305	94.8542	1.79205	0.0015124	Uncharacterized protein
	AMUC_RS01300	Amuc_0231	B2UMC5	SpII	0	688.218	1138.12	1.65372	6.27851e-09	Uncharacterized protein
	AMUC_RS01385	Amuc_0248	B2UME2	SpI	0	205.513	92.5239	0.450209	6.74445e-11	Nitroreductase
	AMUC_RS01400	Amuc_0250	B2UME4	SpI	0	541.178	38.9667	0.0720034	6.45171e-105	Uncharacterized protein
	AMUC_RS01480	Amuc_0260		SpI	0	272.8	506.865	1.85801	1.08309e-07
	AMUC_RS01565	Amuc_0274		SpI	1	9421.93	2335.22	0.247849	4.52225e-112
	AMUC_RS01605		A0A1Y3SZD2	SpII	0	1432.74	605.632	0.422708	5.66084e-32	Uncharacterized protein
	AMUC_RS01615	Amuc_0284	B2UMS0	SpII	0	1150.65	758.054	0.658803	3.02465e-07	Uncharacterized protein
	AMUC_RS01655		B2UMS6	SpI	0	2557.07	2301.9	0.90021	0.20368	Glycoside hydrolase family 2 sugar binding
	AMUC_RS01790	Amuc_0316	B2UMV2	SpI	0	68.9906	257.064	3.72607	1.22528e-21	TPR repeat-containing protein
	AMUC_RS01880	Amuc_0336		SpI	0	222.679	1735.48	7.79362	1.53302e-118
	AMUC_RS01890	Amuc_0338	A0A1Y3SVE5	TMH	0	1478.62	1398.13	0.945559	0.455026	Uncharacterized protein
	AMUC_RS01905	Amuc_0341	A0A1Y3T4V8	SpII	0	136.399	37.9926	0.278541	5.58697e-15	Uncharacterized protein
	AMUC_RS01920	Amuc_0344	B2UMX7	SpI	0	246.497	114.005	0.462499	2.02245e-11	Lipolytic protein G-D-S-L family
	AMUC_RS01985	Amuc_0355	B2UMY8	SpII	0	408.252	862.458	2.11256	4.97838e-22	Uncharacterized protein
	AMUC_RS01990	Amuc_0356	B2UMY9	SpII	0	234.283	442.126	1.88714	5.83622e-11	Uncharacterized protein
	AMUC_RS02035	Amuc_0364	B2UMZ7	SpI	1	40.8667	260.857	6.38311	2.03002e-32	Uncharacterized protein
	AMUC_RS02070	Amuc_0371	B2UN98	SpI	1	292.213	305.476	1.04539	0.65952	Two component regulator propeller domain protein
	AMUC_RS02105	Amuc_0378		SpI	0	1161.28	339.527	0.292373	3.25603e-35
	AMUC_RS02180	Amuc_0392	B2UNB9	TMH	1	820.426	1185.3	1.44474	3.50461e-07	Coagulation factor 5/8 type domain protein
	AMUC_RS02190	Amuc_0394	B2UNC1	TMH	1	20195.9	2747.98	0.136066	2.19166e-166	Uncharacterized protein
	AMUC_RS02240	Amuc_0405		SpI	0	1756.7	5421.2	3.08601	7.01903e-50
	AMUC_RS02260	Amuc_0409	B2UND5	SpII	0	5967.71	807.588	0.135326	1.10741e-256	Putative substrate-binding protein of aliphatic sulfonate ABC transporter
	AMUC_RS02270	Amuc_0411	A0A1Y3SUM2	SpI	0	698.625	216.965	0.310559	3.0024e-27	Uncharacterized protein
	AMUC_RS02310	Amuc_0418	B2UNE4	SpI	0	264.195	482.929	1.82793	4.15118e-10	Ankyrin
	AMUC_RS02370	Amuc_0428	B2UNF4	SpI	0	648.548	770.997	1.1888	0.0481223	Uncharacterized protein
	AMUC_RS02395	Amuc_0433	B2UNF9	SpI	0	165.908	90.689	0.546621	0.00052872	Uncharacterized protein
	AMUC_RS02400	Amuc_0434	B2UNG0	SpI	1	67.3633	151.225	2.24492	3.43691e-08	Uncharacterized protein
	AMUC_RS02405	Amuc_0435	B2UNG1	SpI	1	4996.45	2781.56	0.556706	4.19993e-23	Uncharacterized protein
	AMUC_RS02450			SpII	0	181.611	195.227	1.07498	0.650023
	AMUC_RS02485	Amuc_0451	B2UNH7	SpI	0	281.984	160.305	0.568491	6.54196e-07	Sulfatase
	AMUC_RS02505	Amuc_0454	B2UNI0	SpI	0	38.5123	359.198	9.32684	4.21732e-47	Uncharacterized protein
	AMUC_RS02510	Amuc_0455	B2UNI1	SpI	0	38.1227	229.189	6.01186	9.28173e-28	Lipolytic protein G-D-S-L family
	AMUC_RS02555	Amuc_0464		SpII	0	847.466	1426.08	1.68276	2.94311e-14
	AMUC_RS02560	Amuc_0465	B2UNJ1	SpI	1	387.625	586.616	1.51336	2.00739e-06	Peptidase M23
	AMUC_RS02565	Amuc_0466	B2UNJ2	SpI	0	494.895	653.062	1.3196	0.000947185	TPR repeat-containing protein
	AMUC_RS02600	Amuc_0473	B2UNU1	SpI	0	207.375	350.613	1.69072	1.50229e-07	Uncharacterized protein
	AMUC_RS02615	Amuc_0476		SpI	0	1399.59	805.081	0.575228	1.13619e-11
	AMUC_RS02620		A0A1Y3SUE1	SpII	0	2632.2	289.457	0.109968	1.32443e-216	Uncharacterized protein
	AMUC_RS02645	Amuc_0481	B2UNU9	SpII	0	486.59	151.589	0.311532	3.74625e-34	Uncharacterized protein
	AMUC_RS02700	Amuc_0491	B2UNV9	SpI	0	216.99	40.4016	0.186191	1.11969e-28	Sulfatase
	AMUC_RS02720	Amuc_0495	A0A1Y3SYV1	SpI	0	5860.18	5131.61	0.875675	0.026231	Uncharacterized protein
	AMUC_RS02810	Amuc_0513	B2UNY1	SpII	0	3729.68	887.047	0.237834	6.94629e-120	Uncharacterized protein
	AMUC_RS02815	Amuc_0514	B2UNY2	SpI	0	619.785	501.187	0.808646	0.0467395	Peptidoglycan glycosyltransferase (EC 2.4.1.129)
	AMUC_RS02835	Amuc_0517		SpI	0	36.462	41.7226	1.14427	0.607856
	AMUC_RS02840	Amuc_0518	B2UNY6	SpI	0	8.22251	13.3173	1.61962	0.269122	Uncharacterized protein
	AMUC_RS02875	Amuc_0525	B2UNZ3	SpI	0	395.105	2359.76	5.97249	9.41399e-131	Cycloartenol synthase-like protein
	AMUC_RS02950	Amuc_0539		SpI	0	4255.9	635.253	0.149264	8.92997e-156
	AMUC_RS02975	Amuc_0544	B2UP12	SpI	0	1499.55	4347.18	2.89899	2.35226e-67	Tetratricopeptide TPR_2 repeat protein
	AMUC_RS03070		A0A1Y3SU64	SpI	0	30.791	16.0813	0.522271	0.0244945	Uncharacterized protein
	AMUC_RS03085	Amuc_0563	B2UPC3	SpI	1	898.182	560.455	0.623989	2.4731e-07	Uncharacterized protein
	AMUC_RS03195	Amuc_0584		SpI	0	309.744	146.587	0.473251	4.67536e-12
	AMUC_RS03270	Amuc_0599	B2UPF9	SpI	0	258.004	109.928	0.426069	6.82044e-14	Uncharacterized protein
	AMUC_RS03310	Amuc_0607	B2UPG7	SpI	1	335.279	71.7118	0.213887	3.86099e-37	Endonuclease/exonuclease/phosphatase
	AMUC_RS03320	Amuc_0609	B2UPG9	SpII	1	72.4182	61.1587	0.844521	0.363086	Uncharacterized protein
	AMUC_RS03325	Amuc_0610	B2UPH0	SpII	0	600	604.796	1.00799	0.986583	Tetratricopeptide TPR_2 repeat protein
	AMUC_RS03380	Amuc_0622	B2UPI2	SpI	0	31.8067	37.1198	1.16704	0.466242	Uncharacterized protein
	AMUC_RS03385		B2UPI3	SpI	0	51.8238	91.8992	1.7733	0.0010557	Glycosyl hydrolase BNR repeat-containing protein
	AMUC_RS03395	Amuc_0625		SpI	1	1877.4	1833.08	0.976396	0.764714
	AMUC_RS03405	Amuc_0627	B2UPI7	SpI	0	222.445	190.748	0.857507	0.196469	Uncharacterized protein
	AMUC_RS03495	Amuc_0641	B2UPK1	SpI	1	5.51667	10.0215	1.81659	0.278241	Uncharacterized protein
	AMUC_RS03520	Amuc_0646	B2UPK6	SpI	0	96.2476	106.729	1.1089	0.458667	Uncharacterized protein
	AMUC_RS03550	Amuc_0652	B2UPL2	TMH	1	211.674	818.31	3.8659	1.5945e-50	Peptidoglycan glycosyltransferase (EC 2.4.1.129)
	AMUC_RS03635		B2UPX1	SpI	0	252.606	1839.76	7.28312	4.21913e-138	2-alkenal reductase (EC 1.3.1.74)
	AMUC_RS03640	Amuc_0670	B2UPX2	SpII	0	96.1174	739.448	7.69318	2.40811e-83	Trypsin-like protein serine protease typically periplasmic contain C-terminal PDZ domain-like protein
	AMUC_RS03685	Amuc_0677	B2UPX9	SpI	0	131.257	273.056	2.08032	2.97727e-10	Uncharacterized protein
	AMUC_RS03690	Amuc_0678	B2UPY0	SpII	0	358.696	964.872	2.68994	5.40327e-29	Uncharacterized protein
	AMUC_RS03705	Amuc_0681	B2UPY3	SpI	0	307.069	369.648	1.20379	0.0578964	UDP-N-acetylmuramate
	AMUC_RS03735	Amuc_0687		SpI	0	30463.1	3852.64	0.126469	2.37479e-272
	AMUC_RS03740	Amuc_0688		SpI	0	254.99	235.931	0.925257	0.582477
	AMUC_RS03750	Amuc_0690	B2UPZ2	SpI	0	2082.82	1109.24	0.532564	2.06149e-17	Uncharacterized protein
	AMUC_RS03775	Amuc_0695	B2UPZ7	SpI	0	98.0674	147.166	1.50066	0.00308592	Uncharacterized protein
	AMUC_RS03780	Amuc_0696	B2UPZ8	SpI	0	44.7661	103.317	2.30792	3.5473e-06	Uncharacterized protein
	AMUC_RS03785	Amuc_0697	B2UPZ9	SpI	0	34.1892	122.966	3.59664	3.38966e-12	Beta-glucanase
	AMUC_RS03790	Amuc_0698	B2UQ00	SpI	0	29.6208	82.8022	2.7954	4.28544e-07	Beta-glucanase
	AMUC_RS03800	Amuc_0700	B2UQ02	SpII	0	3003.98	680.432	0.22651	5.16066e-74	Uncharacterized protein
	AMUC_RS03930	Amuc_0724		SpI	0	1268.6	492.325	0.388085	2.02876e-28
	AMUC_RS03970	Amuc_0732	B2UQ34	SpI	0	77.3004	84.8911	1.0982	0.554764	Uncharacterized protein
	AMUC_RS04015	Amuc_0743	A0A1Y3SSG2	SpII	0	134.703	148.197	1.10018	0.465336	Uncharacterized protein
	AMUC_RS04055	Amuc_0751	B2UQ52	SpI	0	857.794	100.531	0.117198	1.02385e-118	Uncharacterized protein
	AMUC_RS04120		A0A1Y3SUK9	SpI	0	656.683	213.943	0.325793	6.34756e-23	Uncharacterized protein
	AMUC_RS04150	Amuc_0770		SpI	0	30.95	12.2051	0.394347	0.00325449
	AMUC_RS04195	Amuc_0778	B2UQ77	SpI	1	94.3511	39.9435	0.42335	6.89402e-07	Uncharacterized protein
	AMUC_RS04275	Amuc_0793	B2UQ92	SpI	0	1709.23	782.471	0.457791	2.06983e-21	Uncharacterized protein
	AMUC_RS04280	Amuc_0794	B2UQ93	SpI	0	2951.53	998.118	0.33817	3.75591e-52	Uncharacterized protein
	AMUC_RS04425	Amuc_0821		SpII	0	293.894	636.058	2.16425	6.6775e-20
	AMUC_RS04435	Amuc_0823	A0A1Y3SRV1	SpI	0	131.057	412.629	3.14846	1.5547e-25	Uncharacterized protein
	AMUC_RS04440	Amuc_0824		SpI	0	2697.97	2144.35	0.794801	0.00031657
	AMUC_RS04445	Amuc_0825	B2UQC3	SpI	0	302.805	221.362	0.73104	0.00192693	Uncharacterized protein
	AMUC_RS04535	Amuc_0837	B2UQD5	SpII	0	271.825	169.32	0.622901	3.54056e-05	Uncharacterized protein
	AMUC_RS04585	Amuc_0846	B2UQE4	SpI	0	48.0881	54.6173	1.13578	0.511099	Coagulation factor 5/8 type domain protein
	AMUC_RS04610	Amuc_0851	B2UQE9	SpII	0	24.0467	73.3039	3.0484	3.90928e-06	Uncharacterized protein
	AMUC_RS04615			SpII	0	428.115	185.832	0.434071	3.37525e-11
	AMUC_RS04700	Amuc_0868	B2UQG6	SpI	0	169.634	74.5287	0.439351	1.40777e-09	Beta-N-acetylhexosaminidase (EC 3.2.1.52)
	AMUC_RS04710	Amuc_0870	B2UQG8	SpI	0	169.512	120.751	0.712343	0.0069256	Alkaline phosphatase (EC 3.1.3.1)
	AMUC_RS04735	Amuc_0875	B2UQH3	SpI	0	231.348	105.551	0.456243	1.00105e-09	Glycoside hydrolase family 16
	AMUC_RS04810	Amuc_0889	B2UQI7	SpII	0	57.6632	229.098	3.97304	4.12574e-17	Efflux transporter, RND family, MFP subunit
	AMUC_RS04820	Amuc_0891		SpI	0	6.48434	11.0626	1.70605	0.348854
	AMUC_RS04830	Amuc_0893	B2UQJ1	SpI	0	1148.86	110.907	0.096536	2.14699e-137	Uncharacterized protein
	AMUC_RS04870	Amuc_0900	B2UQJ8	SpI	0	1070.97	470.815	0.439614	4.12181e-20	Uncharacterized protein
	AMUC_RS04880	Amuc_0903	B2UQK0	SpII	0	279.198	417.028	1.49366	1.17582e-05	N-acetylmuramoyl-L-alanine amidase family 2
	AMUC_RS04885	Amuc_0904	B2UQK1	SpI	0	363.717	426.753	1.17331	0.178553	Aconitate hydratase (Aconitase) (EC 4.2.1.3)
	AMUC_RS04895	Amuc_0906	B2UQK3	SpI	1	6988.66	2665.18	0.381357	7.54456e-40	Multifunctional fusion protein [Includes: Peptide methionine sulfoxide reductase MsrB (EC 1.8.4.12) (Peptide-methionine (R)-S-oxide reductase); Peptide methionine sulfoxide reductase MsrA (Protein-methionine-S-oxide reductase) (EC 1.8.4.11) (Peptide-methionine (S)-S-oxide reductase) (Peptide Met(O) reductase)]
	AMUC_RS04905	Amuc_0908	B2UQK5	SpI	1	413.706	194.277	0.469602	1.40841e-12	Uncharacterized protein
	AMUC_RS04970	Amuc_0920	B2UQL7	SpI	0	1188.93	147.14	0.123759	1.53743e-142	Glycosyl hydrolase family 109 protein 2 (EC 3.2.1.-)
	AMUC_RS04980	Amuc_0922	B2UQL9	SpI	0	979.449	100.572	0.102682	1.53872e-125	Metallophosphoesterase
	AMUC_RS04985	Amuc_0923	A0A1Y3SW60	SpII	0	2332.13	132.502	0.0568156	1.57822e-293	Probable endolytic peptidoglycan transglycosylase RlpA (EC 4.2.2.-)
	AMUC_RS05115	Amuc_0949		SpI	0	621.837	402.91	0.647936	1.56947e-07
	AMUC_RS05130	Amuc_0952	B2UQP9	SpI	0	446.001	769.861	1.72614	7.8904e-10	Uncharacterized protein
	AMUC_RS05170	Amuc_0961	A0A1Y3T0V4	SpI	0	1654.57	644.281	0.389396	4.27131e-16	Tat (Twin-arginine translocation) pathway signal sequence
	AMUC_RS05190	Amuc_0965	B2UQR2	SpI	0	587.975	1271.5	2.16252	5.1673e-27	Uncharacterized protein
	AMUC_RS05195			SpI	1	65.2702	211.738	3.24403	5.82655e-14
	AMUC_RS05270			SpII	0	11.9823	174.876	14.5946	3.40523e-29
	AMUC_RS05320	Amuc_0990	B2UQT4	SpI	0	102.228	534.188	5.22545	1.55323e-50	Uncharacterized protein
	AMUC_RS05335		B2UQT6	SpII	0	208.839	106.597	0.510426	2.10068e-07	Uncharacterized protein
	AMUC_RS05345	Amuc_0995	B2UQT8	SpI	0	103.859	62.9338	0.605956	0.00400659	Uncharacterized protein
	AMUC_RS05355	Amuc_0997	B2UQU0	SpII	0	45.9409	28.6787	0.624253	0.0482659	Uncharacterized protein
	AMUC_RS05410	Amuc_1008	B2UQU9	SpI	0	1063.38	3584.73	3.37107	2.58421e-68	Glycoside hydrolase family 31
	AMUC_RS05445	Amuc_1015	B2UQV6	SpI	0	18.0863	13.1865	0.729085	0.460917	Uncharacterized protein
	AMUC_RS05465	Amuc_1019		SpI	0	2623.57	419.366	0.159846	1.56613e-112
	AMUC_RS05485	Amuc_1023	B2UQW4	SpI	1	51.3748	270.674	5.26861	4.1967e-28	Uncharacterized protein
	AMUC_RS05535	Amuc_1033	B2UQX4	SpI	0	225.683	398.639	1.76636	1.92423e-09	Sulfatase
	AMUC_RS05560	Amuc_1039	B2UQY0	SpI	0	1782.35	652.848	0.366285	1.82485e-29	Outer membrane autotransporter barrel domain protein
	AMUC_RS05640	Amuc_1053		TMH	0	664.633	1821.49	2.74059	4.88954e-44
	AMUC_RS05675	Amuc_1060	B2UR01	SpI	0	192.318	147.535	0.767138	0.028557	Membrane-fusion protein-like protein
	AMUC_RS05685	Amuc_1062	A0A1Y3SVY2	SpI	0	36.8523	118.234	3.20833	2.54024e-10	Uncharacterized protein
	AMUC_RS05755	Amuc_1074	B2UR15	SpI	0	308.924	1160.51	3.75663	4.16689e-63	Sulfatase
	AMUC_RS05785			SpI	0	375.324	218.894	0.583213	4.32415e-08
	AMUC_RS05790	Amuc_1079	B2UR20	SpI	0	1222.33	651.739	0.533195	2.28636e-13	L-aspartate oxidase (EC 1.4.3.16)
	AMUC_RS05830	Amuc_1085		SpI	0	160.447	75.7755	0.472276	4.02893e-08
	AMUC_RS05855	Amuc_1091		SpI	1	415.603	459.532	1.1057	0.265257
	AMUC_RS05890	Amuc_1098	B2UR39	SpI	0	1199.91	2469.62	2.05817	4.2313e-21	Type II and III secretion system protein
	AMUC_RS05900	Amuc_1100	B2UR41	SpI	1	85.0085	458.628	5.39509	4.01939e-44	Uncharacterized protein
	AMUC_RS05910	Amuc_1102	B2UR43	SpI	0	309.539	356.583	1.15198	0.154379	Uncharacterized protein
	AMUC_RS05965	Amuc_1114		SpI	0	509.201	324.361	0.637	2.75795e-07
	AMUC_RS05995	Amuc_1120		SpI	0	1001.99	424.075	0.423232	6.46838e-20
	AMUC_RS06070	Amuc_1135	B2UR76	SpI	0	15.049	6.41541	0.426301	0.0447268	Uncharacterized protein
	AMUC_RS06100	Amuc_1141	B2UR82	TMH	0	11.5111	9.6657	0.839685	0.76001	Glycosyl transferase family 11
	AMUC_RS06150	Amuc_1153	B2UR93	TMH	1	86.172	30.2363	0.350883	5.28031e-08	Potassium-transporting ATPase KdpC subunit (ATP phosphohydrolase [potassium-transporting] C chain) (Potassium-binding and translocating subunit C) (Potassium-translocating ATPase C chain)
	AMUC_RS06165	Amuc_1155	B2UR95	SpI	0	164.665	43.7899	0.265933	6.15048e-18	Uncharacterized protein
	AMUC_RS06170	Amuc_1156		SpI	1	27.9307	12.8196	0.45898	0.0438373
	AMUC_RS06175	Amuc_1157	B2UR97	SpI	0	736.02	234.542	0.318663	1.52507e-28	Beta-lactamase domain protein
	AMUC_RS06190	Amuc_1160	B2URA0	SpI	0	44.6277	64.5035	1.44537	0.0710816	Aldo/keto reductase
	AMUC_RS06310		B2URC2	SpI	0	791.285	258.926	0.327222	2.79334e-39	Sulfatase
	AMUC_RS06330			SpI	0	138.873	631.025	4.54392	3.16307e-51
	AMUC_RS06385	Amuc_1196	A0A1Y3T5K2	SpI	0	44.6258	106.458	2.38556	4.1753e-06	Uncharacterized protein
	AMUC_RS06415	Amuc_1202	B2URE2	SpI	0	27.8245	68.1351	2.44874	0.000110971	Uncharacterized protein
	AMUC_RS06450	Amuc_1209	B2URE9	SpI	0	269.491	122.431	0.454305	7.35803e-13	Uncharacterized protein
	AMUC_RS06460	Amuc_1211	B2URF1	SpII	0	281.598	142.813	0.507151	0.0278515	N-acetylmuramoyl-L-alanine amidase family 2
	AMUC_RS06470	Amuc_1213	B2URF3	SpI	0	22116.8	1940.5	0.0877389	8.00845e-268	Uncharacterized protein
	AMUC_RS06475	Amuc_1214		SpI	0	161.431	180.442	1.11777	0.35867
	AMUC_RS06490	Amuc_1216		SpI	0	1016.85	505.799	0.49742	1.45171e-16
	AMUC_RS06540	Amuc_1220		SpI	0	242.294	313.776	1.29502	0.0191805
	AMUC_RS06645	Amuc_1240	A0A1Y3SYV5	SpI	0	335.427	1237.72	3.68998	2.68849e-55	Uncharacterized protein
	AMUC_RS06730	Amuc_1255		TMH	0	164.464	158.254	0.962241	0.808301
	AMUC_RS06755	Amuc_1260		SpI	0	90.4223	119.675	1.32351	0.0543463
	AMUC_RS06785			SpI	1	119.245	35.8761	0.300862	5.74907e-12
	AMUC_RS06795	Amuc_1267	B2URK7	SpI	0	614.843	1023.2	1.66416	9.15e-09	Uncharacterized protein
	AMUC_RS06810	Amuc_1270	B2URL0	SpI	0	84.1458	68.3844	0.812689	0.247214	Uncharacterized protein
	AMUC_RS06830	Amuc_1274	B2URL4	SpII	0	94.8622	65.2449	0.687786	0.035118	Uncharacterized protein
	AMUC_RS06840	Amuc_1276	B2URL6	SpI	0	144.11	54.8454	0.380579	3.60975e-09	Uncharacterized protein
	AMUC_RS06870		B2URM2	SpI	0	2320.19	1767.92	0.761974	0.000143249	Peptidyl-prolyl cis-trans isomerase
	AMUC_RS06875	Amuc_1283		SpI	0	2268.23	5584.57	2.46208	1.31401e-54
	AMUC_RS06905		A0A1Y3T3G1	SpI	1	700.801	179.902	0.256709	2.83172e-58	Uncharacterized protein
	AMUC_RS06910	Amuc_1291	B2URN0	SpII	0	94.519	70.1697	0.742387	0.0696391	Putative surface layer protein, with cytochrome c domain
	AMUC_RS06985	Amuc_1306	B2URP5	SpI	0	188.845	59.2946	0.313985	5.17394e-15	Phosphate binding protein
	AMUC_RS07005		B2URP9	SpII	0	2225.09	693.01	0.311452	4.20446e-55	17 kDa surface antigen
	AMUC_RS07010	Amuc_1311	B2URQ0	SpI	0	31553.4	15099.1	0.478526	1.02958e-29	Uncharacterized protein
	AMUC_RS07115	Amuc_1333	B2UKN4	SpI	0	2866.48	2252.46	0.785794	0.000188257	Uncharacterized protein
	AMUC_RS07165	Amuc_1343	B2UKP4	SpI	0	1752.77	176.604	0.100757	9.36264e-120	Uncharacterized protein
	AMUC_RS07360	Amuc_1382	B2UKT3	SpI	1	1602.84	960.24	0.599088	3.73717e-11	Secretion protein HlyD family protein
	AMUC_RS07375	Amuc_1385	B2UKT6	SpI	0	383.975	182.299	0.474767	8.53753e-12	Uncharacterized protein
	AMUC_RS07410	Amuc_1391	B2UKU2	SpI	0	52.9745	26.2263	0.495073	0.00167707	Uncharacterized protein
	AMUC_RS07525	Amuc_1409	B2UKV9	SpI	0	36182.1	4875.1	0.134738	7.84495e-110	Uncharacterized protein
	AMUC_RS07545	Amuc_1411	B2UKW1	SpI	0	1881.51	1970.49	1.04729	0.50817	Uncharacterized protein
	AMUC_RS07550	Amuc_1412	B2UKW2	SpI	0	1332.43	1866.15	1.40056	3.36121e-06	Uncharacterized protein
	AMUC_RS07560	Amuc_1414	B2UKW4	SpI	0	84.2802	121.349	1.43983	0.0214443	Polysaccharide export protein
	AMUC_RS07590	Amuc_1419		SpI	0	141.159	253.788	1.79789	9.42071e-07
	AMUC_RS07630	Amuc_1426	B2UKX5	SpI	0	1810.66	3734.44	2.06248	1.46092e-19	Uncharacterized protein
	AMUC_RS07700	Amuc_1438		SpI	0	818.858	825.054	1.00757	0.950434
	AMUC_RS07705	Amuc_1439	B2UKY8	SpI	0	316.687	489	1.54411	7.71329e-07	Organic solvent tolerance protein OstA-like protein
	AMUC_RS07710			SpI	0	5.89756	3.65111	0.619088	0.520763
	AMUC_RS07780	Amuc_1451	B2UL00	SpI	0	287.13	114.59	0.399085	1.15309e-14	Uncharacterized protein
	AMUC_RS07805	Amuc_1456	A0A1Y3T5W8	SpI	0	43.2264	623.541	14.425	3.74182e-66	Uncharacterized protein
	AMUC_RS07890	Amuc_1473	B2UL22	SpI	0	443.039	642.24	1.44962	8.94082e-05	Uncharacterized protein
	AMUC_RS07920	Amuc_1478	B2UL27	SpI	1	182.27	130.705	0.717095	0.00881564	Uncharacterized protein
	AMUC_RS07930	Amuc_1480		SpI	0	407.782	260.851	0.639683	2.21057e-05
	AMUC_RS07960	Amuc_1486	B2UL35	SpII	0	244.783	523.035	2.13672	3.44636e-16	Uncharacterized protein
	AMUC_RS08030	Amuc_1499	B2UL48	SpI	1	300.072	510.919	1.70266	2.83429e-08	Putative sigma E regulatory protein, MucB/RseB
	AMUC_RS08035		B2UL49	SpII	0	190.175	791.927	4.16421	2.87753e-41	Polysaccharide deacetylase
	AMUC_RS08045		A0A1Y3T1H8	SpI	0	24974.1	34135.8	1.36685	2.93947e-08	Uncharacterized protein
	AMUC_RS08105	Amuc_1514		TMH	1	508.692	498.561	0.980084	0.876392
	AMUC_RS08150	Amuc_1524		TMH	1	142.723	209.749	1.46963	0.000903113
	AMUC_RS08155	Amuc_1525	B2ULF9	SpI	1	178.203	303.64	1.7039	8.81149e-06	Uncharacterized protein
	AMUC_RS08175	Amuc_1529		SpI	1	699.273	104.838	0.149925	7.15044e-63
	AMUC_RS08225	Amuc_1537		SpI	1	918.896	1251.34	1.36179	9.81562e-05
	AMUC_RS08260	Amuc_1544		SpI	1	171.223	165.929	0.969079	0.889814
	AMUC_RS08265		B2ULI0	SpI	0	145.419	103.7	0.713114	0.0327081	Lipolytic protein G-D-S-L family
	AMUC_RS08270	Amuc_1547	B2ULI1	SpI	0	156.722	154.44	0.985438	0.991754	Uncharacterized protein
	AMUC_RS08345	Amuc_1560		SpI	0	2233.65	1280.2	0.573143	1.54304e-16
	AMUC_RS08375	Amuc_1565	B2ULJ9	SpI	0	1793.6	1000.73	0.557946	7.19207e-20	Alpha-2-macroglobulin domain protein
	AMUC_RS08395	Amuc_1568	A0A1Y3SZL9	SpI	0	3729.44	259.459	0.0695707	0	Uncharacterized protein
	AMUC_RS08400	Amuc_1569	B2ULK3	SpII	0	99244.1	6209.88	0.0625718	0	Uncharacterized protein
	AMUC_RS08515	Amuc_1593	B2ULM6	SpI	0	99.0458	198.917	2.00833	5.3065e-07	Uncharacterized protein
	AMUC_RS08560		B2ULN6	SpI	0	76.5248	138.901	1.81512	7.60622e-05	Uncharacterized protein
	AMUC_RS08625	Amuc_1616	B2ULZ2	SpI	0	180.246	606.549	3.36512	4.72439e-35	Polysaccharide deacetylase
	AMUC_RS08650	Amuc_1620	B2ULZ6	SpI	0	170.862	140.695	0.823443	0.189746	Outer membrane autotransporter barrel domain protein
	AMUC_RS08665	Amuc_1622	B2ULZ8	SpII	0	631.716	484.428	0.766845	0.00613749	Uncharacterized protein
	AMUC_RS08690	Amuc_1627		SpII	0	99.3325	177.077	1.78267	3.04435e-05
	AMUC_RS08710	Amuc_1631	B2UM07	SpI	0	908.239	1804.2	1.98648	5.57879e-21	Carboxyl-terminal protease (EC 3.4.21.102)
	AMUC_RS08735	Amuc_1635	B2UM11	SpI	0	2565.33	1230.36	0.47961	4.7084e-32	Uncharacterized protein
	AMUC_RS08750	Amuc_1638		SpI	0	472.742	752.994	1.59282	8.23774e-09
	AMUC_RS08835	Amuc_1655		SpI	0	2192.51	208.336	0.0950215	5.35725e-216
	AMUC_RS08840	Amuc_1656	A0A1Y3T498	TMH	1	473.159	360.668	0.762257	0.00940436	Uncharacterized protein
	AMUC_RS08860			SpI	0	550.509	57.9089	0.105192	1.13891e-97
	AMUC_RS08875			SpI	0	140.875	57.9053	0.411041	9.43043e-09
	AMUC_RS08890	Amuc_1666	B2UM40	SpI	0	403.864	55.1371	0.136524	1.74337e-61	Beta-galactosidase (EC 3.2.1.23) (Lactase)
	AMUC_RS08895	Amuc_1667		SpI	1	85.8527	65.678	0.765008	0.14372
	AMUC_RS08905	Amuc_1669	B2UM43	SpI	0	263.374	83.4021	0.316667	8.267e-19	Beta-N-acetylhexosaminidase (EC 3.2.1.52)
	AMUC_RS08930	Amuc_1672	B2UM46	SpI	0	40.8707	54.4148	1.33139	0.232522	Uncharacterized protein
	AMUC_RS08995	Amuc_1684	B2UM58	SpI	0	823.732	6439.22	7.81713	1.70398e-206	TonB-dependent receptor
	AMUC_RS09005	Amuc_1686	B2UM60	SpI	0	829.926	306.789	0.369659	8.71571e-36	Beta-galactosidase (EC 3.2.1.23)
	AMUC_RS09010	Amuc_1687	B2UM61	SpI	0	1752.5	497.665	0.283974	4.62627e-80	Uncharacterized protein
	AMUC_RS09115	Amuc_1707	A0A1Y3TA33	SpI	0	150.224	20.1069	0.133846	1.11572e-29	Nucleotide pyrophosphatase
	AMUC_RS09150	Amuc_1712	B2UMH4	SpI	0	219.098	223.823	1.02157	0.888342	Succinate--CoA ligase [ADP-forming] subunit alpha (EC 6.2.1.5)
	AMUC_RS09205	Amuc_1722		SpI	0	1163.54	562.98	0.483851	3.75035e-15
	AMUC_RS09210	Amuc_1723		SpI	0	1252.84	395.83	0.315945	3.36277e-55
	AMUC_RS09250	Amuc_1731	B2UMJ3	SpI	0	241.184	492.097	2.04034	6.17845e-14	Uncharacterized protein
	AMUC_RS09310	Amuc_1743	B2UMK5	SpI	0	1359.44	160.648	0.118172	1.34875e-142	Uncharacterized protein
	AMUC_RS09355	Amuc_1752	A0A1Y3STQ6	SpII	0	28.2636	76.1482	2.69422	6.13439e-06	Uncharacterized protein
	AMUC_RS09370	Amuc_1755	B2UML7	SpI	0	1886.9	722.047	0.382664	7.28275e-44	Sulfatase
	AMUC_RS09430	Amuc_1767	A0A1Y3SY58	SpI	0	618.639	884.518	1.42978	1.39402e-06	Uncharacterized protein
	AMUC_RS09550	Amuc_1790	B2UMQ2	SpI	0	156.733	130.495	0.832594	0.167525	PDZ/DHR/GLGF domain protein
	AMUC_RS09555		B2UMQ3	SpI	0	332.715	143.176	0.430327	2.13196e-13	Peptidase S1 and S6 chymotrypsin/Hap
	AMUC_RS09600	Amuc_1799	B2UN06	SpI	0	324.32	427.113	1.31695	0.00228472	Uncharacterized Fe-S center protein, putative ferredoxin
	AMUC_RS09610	Amuc_1801	B2UN08	SpI	0	306.257	624.027	2.0376	7.45714e-14	Peptidase S15
	AMUC_RS09615	Amuc_1802	B2UN09	SpI	0	194.033	353.598	1.82236	1.04927e-08	Aldo/keto reductase
	AMUC_RS09630	Amuc_1805		SpI	0	115.14	239.619	2.08111	1.73838e-07
	AMUC_RS09635	Amuc_1806		SpI	0	170.889	760.755	4.45175	9.97745e-46
	AMUC_RS09685	Amuc_1815		SpI	0	252.353	134.844	0.534347	1.46698e-07
	AMUC_RS09735	Amuc_1824	B2UN31	SpI	0	3477.75	562.705	0.161801	4.72362e-114	Uncharacterized protein
	AMUC_RS09795	Amuc_1834	B2UN41	SpI	0	1504.84	375.56	0.249568	1.42262e-42	Uncharacterized protein
	AMUC_RS09800			SpI	0	803.997	857.975	1.06714	0.401391
	AMUC_RS09905		A0A1Y3STD5	SpII	0	813.514	338.544	0.41615	4.2812e-29	ABC transporter substrate-binding protein
	AMUC_RS09945	Amuc_1861	B2UN64	SpI	0	79.4953	124.745	1.56922	0.00303068	Uncharacterized protein
	AMUC_RS09960	Amuc_1864	B2UN67	SpI	1	316.012	1172.57	3.71052	1.11441e-56	Uncharacterized protein
	AMUC_RS10095	Amuc_1891	B2UN94	SpII	0	1581.46	2566.87	1.6231	1.29509e-14	Uncharacterized protein
	AMUC_RS10185	Amuc_1908		SpI	0	129.316	101.084	0.781685	0.114301
	AMUC_RS10190	Amuc_1909	B2UNK7	SpI	1	24.5331	55.0843	2.2453	0.00188127	Uncharacterized protein
	AMUC_RS10195	Amuc_1910	B2UNK8	SpII	0	465.187	128.354	0.275919	6.83839e-30	Uncharacterized protein
	AMUC_RS10265	Amuc_1924	B2UNM1	SpI	0	339.342	452.014	1.33203	0.00180591	Beta-N-acetylhexosaminidase (EC 3.2.1.52)
	AMUC_RS10290	Amuc_1928	B2UNM5	SpI	0	284.89	60.8976	0.213758	3.42605e-30	Periplasmic binding protein
	AMUC_RS10320	Amuc_1934	B2UNN1	SpI	0	199.05	68.9825	0.346558	2.04037e-15	Uncharacterized protein
	AMUC_RS10350	Amuc_1939	A0A1Y3T004	TMH	1	955.486	708.832	0.741855	3.31306e-05	Uncharacterized protein
	AMUC_RS10375	Amuc_1943	B2UNP0	SpI	0	1048.9	1809.34	1.725	5.07548e-15	Tetratricopeptide TPR_2 repeat protein
	AMUC_RS10385	Amuc_1945	B2UNP2	SpI	0	93.6915	209.354	2.23451	4.05025e-09	Uncharacterized protein
	AMUC_RS10455	Amuc_1959	B2UNQ6	SpI	0	152.196	47.0233	0.308965	6.57626e-13	Uncharacterized protein
	AMUC_RS10460	Amuc_1960	B2UNQ7	SpI	0	843.803	84.572	0.100227	5.16822e-109	PA14 domain protein
	AMUC_RS10500	Amuc_1967	B2UNR4	SpII	0	174.625	153.859	0.881085	0.315115	Thioredoxin domain
	AMUC_RS10510	Amuc_1969	A0A1Y3SVG3	SpI	0	523.322	433.208	0.827803	0.0224786	Uncharacterized protein
	AMUC_RS10560	Amuc_1976	B2UNS3	SpI	0	172.772	572.818	3.31545	1.15332e-35	Sel1 domain protein repeat-containing protein
	AMUC_RS10570	Amuc_1978	A0A1Y3ST89	SpI	1	318.322	80.2632	0.252144	1.49179e-31	PEP-CTERM sorting domain-containing protein
	AMUC_RS10580	Amuc_1982	B2UNS7	SpI	0	56.787	23.1548	0.407749	0.000554172	Uncharacterized protein
	AMUC_RS10600	Amuc_1986	B2UNT1	SpI	0	31.2534	82.6205	2.64357	2.35752e-06	Uncharacterized protein
	AMUC_RS10605	Amuc_1987	B2UNT2	SpI	0	18.0817	104.01	5.75222	5.58419e-13	Squalene-hopene cyclase-like protein
	AMUC_RS10610	Amuc_1988	B2UNT3	SpI	1	45.6141	265.144	5.81277	1.26781e-31	Uncharacterized protein
	AMUC_RS10615	Amuc_1989	B2UNT4	SpI	0	79.3655	229.548	2.89229	9.36768e-14	Uncharacterized protein
	AMUC_RS10760		B2UP57	SpI	0	102.068	39.7834	0.389772	4.17747e-08	Beta-N-acetylhexosaminidase (EC 3.2.1.52)
	AMUC_RS10765		B2UP58	SpI	0	585.868	265.757	0.453611	3.93686e-20	Beta-N-acetylhexosaminidase (EC 3.2.1.52)
	AMUC_RS10785	Amuc_2023	B2UP62	SpI	0	189.263	44.3057	0.234096	6.18948e-21	Uncharacterized protein
	AMUC_RS10825	Amuc_2029	B2UP68	SpI	0	1027.09	4337.96	4.22356	4.04543e-113	Efflux transporter, RND family, MFP subunit
	AMUC_RS10890	Amuc_2041	B2UP80	SpII	0	161.323	855.572	5.30348	7.62583e-62	Efflux transporter, RND family, MFP subunit
	AMUC_RS10900	Amuc_2043		SpI	0	83.0872	889.529	10.706	6.52754e-92
	AMUC_RS10905	Amuc_2044	B2UP83	SpI	1	28.047	258.349	9.2113	1.13813e-37	Uncharacterized protein
	AMUC_RS10910	Amuc_2045	B2UP84	SpI	0	77.5459	113.899	1.46879	0.0286766	Uncharacterized protein
	AMUC_RS10980	Amuc_2057	B2UP96	SpI	0	2298.78	2522.93	1.09751	0.177967	Uncharacterized protein
	AMUC_RS11080	Amuc_2075	B2UPB3	SpII	0	62.5924	99.617	1.59152	0.00552804	Uncharacterized protein
	AMUC_RS11090	Amuc_2077	B2UPB5	SpII	1	3640.08	286.593	0.0787325	6.98729e-242	Polysaccharide export protein
	AMUC_RS11200	Amuc_2099		SpI	0	6921.89	1269.88	0.183459	4.32482e-187
	AMUC_RS11230	Amuc_2105		SpI	1	174.112	432.751	2.48547	8.26232e-19
	AMUC_RS11270			SpII	0	167.208	389.567	2.32984	5.7592e-15
	AMUC_RS11350	Amuc_2126	A0A1Y3SXC8	SpI	0	470.861	1478.13	3.13921	3.46102e-38	PEP-CTERM sorting domain-containing protein
	AMUC_RS11355	Amuc_2127	B2UPQ8	SpI	0	510.563	304.045	0.59551	2.69368e-09	Carbohydrate-selective porin OprB
	AMUC_RS11395	Amuc_2135	B2UPR6	SpII	0	1234.94	110.567	0.0895323	1.71295e-83	Uncharacterized protein
	AMUC_RS11400	Amuc_2136	B2UPR7	SpI	0	1596.43	1236.5	0.774541	0.000101495	Glycoside hydrolase, family 20, catalytic core
	AMUC_RS11455	Amuc_2147	B2UPS7	SpII	1	385.971	148.599	0.385001	6.12654e-18	Uncharacterized protein
	AMUC_RS11515	Amuc_2159	B2UPT8	SpII	0	209.339	392.493	1.87491	3.55695e-10	Uncharacterized protein
	AMUC_RS11535	Amuc_2163	B2UPU2	SpI	0	2011.71	5139.48	2.55478	2.78742e-51	Sel1 domain protein repeat-containing protein
	AMUC_RS11540	Amuc_2164		TMH	0	1498.64	647.205	0.43186	1.1795e-27
	AMUC_RS11560	Amuc_2168	B2UPU7	SpII	0	434.892	231.527	0.532379	0.0455927	Tetratricopeptide TPR_2 repeat protein
	AMUC_RS11580	Amuc_2173	A0A1Y3SXF8	SpI	1	117.218	256.831	2.19105	1.69764e-11	Uncharacterized protein
	AMUC_RS11625	Amuc_0019	B2UL77	SpII	0	124.645	79.5766	0.638426	0.00205777	Uncharacterized protein
	AMUC_RS11650	Amuc_0052	B2ULA9	SpI	0	2322.18	594.904	0.256183	4.27349e-98	Hyalurononglucosaminidase (EC 3.2.1.35)
	AMUC_RS11690	Amuc_0145	B2ULU5	SpII	0	140.41	221.418	1.57694	0.000351674	4-phytase (EC 3.1.3.26)
	AMUC_RS11695	Amuc_0147	B2ULU7	SpI	0	30135.2	5808.44	0.192746	8.9301e-161	Thioredoxin domain
	AMUC_RS11710	Amuc_0191	B2UM86	SpI	0	36.9726	229.082	6.19599	3.43687e-30	Uncharacterized protein
	AMUC_RS11715	Amuc_0194	B2UM89	SpII	0	37.7519	218.906	5.79854	2.53146e-25	Uncharacterized protein
	AMUC_RS11765	Amuc_0369		SpI	0	121.117	32.6715	0.269751	7.74427e-14
	AMUC_RS11775	Amuc_0385		SpII	0	877.087	281.787	0.321276	9.16981e-34
	AMUC_RS11815	Amuc_0565	B2UPC5	SpI	0	235.07	268.287	1.1413	0.223404	Sulfatase
	AMUC_RS11850	Amuc_0745	B2UQ46	SpI	1	2924.93	609.157	0.208263	8.81842e-120	Uncharacterized protein
	AMUC_RS11875	Amuc_0803	A0A1Y3SRS5	SpI	1	547.906	300.631	0.548691	1.5478e-11	Uncharacterized protein
	AMUC_RS11885	Amuc_0820	B2UQB8	SpII	0	161.443	484.899	3.00353	1.01754e-24	ErfK/YbiS/YcfS/YnhG family protein
	AMUC_RS11890	Amuc_0863	B2UQG1	SpI	0	1147.92	111.268	0.0969304	3.33345e-148	Glycosyl hydrolase family 88
	AMUC_RS11900	Amuc_0882	B2UQI0	SpI	1	20824.4	4586.63	0.220253	2.80103e-41	Uncharacterized protein
	AMUC_RS11910	Amuc_0895	B2UQJ3	SpI	0	137.783	141.158	1.0245	0.881333	Uncharacterized protein
	AMUC_RS11920	Amuc_0905		SpII	0	6055.69	312.269	0.0515662	0
	AMUC_RS11945	Amuc_0953		TMH	0	151.317	194.849	1.28769	0.0483189
	AMUC_RS11965	Amuc_1032	A0A1Y3T0C9	SpI	0	207.853	408.213	1.96395	1.22363e-10	Uncharacterized protein
	AMUC_RS11990	Amuc_1119	B2UR60	SpI	0	312.722	602.611	1.92698	5.8715e-13	Uncharacterized protein
	AMUC_RS12025	Amuc_1259		SpI	0	255.96	64.9912	0.253911	3.19822e-24
	AMUC_RS12090	Amuc_1583	B2ULL6	TMH	1	214.945	409.698	1.90606	1.22992e-10	Uncharacterized protein
	AMUC_RS12105	Amuc_1644	B2UM20	SpI	0	173.494	122.623	0.706789	0.00729451	Transglutaminase domain protein
	AMUC_RS12150	Amuc_1841	B2UN47	SpI	0	912.911	367.181	0.402209	1.36484e-24	Thioredoxin domain
	AMUC_RS12245	Amuc_2108	B2UPN9	SpI	1	829.115	307.841	0.371289	1.8291e-30	Glycoside hydrolase family 16
	AMUC_RS12270	Amuc_0049		TMH	0	69.2504	21.0172	0.303495	1.70033e-07
	AMUC_RS12315	Amuc_0579		SpII	0	29.4812	26.5743	0.9014	0.722052
	AMUC_RS12320	Amuc_0580		SpII	1	16662.2	572.428	0.034355	0
	AMUC_RS12430	Amuc_1765		SpII	0	108.37	363.215	3.35163	4.15765e-26
	AMUC_RS12445	Amuc_2165		SpI	0	1559.63	584.379	0.374691	7.74714e-37
